# Supplementary material
Source: PubMed Central journal article supplement (PMC9046466)
Supplement: NIHMS1748393-supplement-Supp1.pdf [file NIHMS1748393-supplement-Supp1.pdf]

**Supplemental Table 1.** Detailed search strategy

| Search terms                                                                                                                                                                                                                                                                                             | Search date | Database            | Dates                 | Additional filters | Number of articles returned |
|----------------------------------------------------------------------------------------------------------------------------------------------------------------------------------------------------------------------------------------------------------------------------------------------------------|-------------|---------------------|-----------------------|--------------------|-----------------------------|
| 1. ((natural language processing) OR (nlp)) AND ((cardiology) OR (cardiac) OR (cardiovascular))                                                                                                                                                                                                          | 4/10/2020   | PubMed              | 1/1/2015 – 4/10/2020  | English            | 200                         |
| 2. ((natural language processing) OR (nlp)) AND ((cardiology) OR (cardiac) OR (cardiovascular))                                                                                                                                                                                                          | 4/10/2020   | Embase              | 1/1/2015 – 4/10/2020  | English            | 159                         |
| 3. ((natural language processing) OR (nlp)) AND ((cardiology) OR (cardiac) OR (cardiovascular))                                                                                                                                                                                                          | 4/10/2020   | Scopus              | 1/1/2015 – 4/10/2020  | English            | 161                         |
| 4. ((natural language processing) OR (nlp)) AND ((cardiology) OR (cardiac) OR (cardiovascular))                                                                                                                                                                                                          | 4/10/2020   | ACM Digital Library | 1/1/2015 – 4/10/2020  | None               | 109                         |
| 5. natural language processing) OR (nlp)) AND ((cardiology) OR (cardiac) OR (cardiovascular))                                                                                                                                                                                                            | 4/10/2020   | IEEE Explore        | 1/1/2015 – 4/10/2020  | None               | 20                          |
| 6. natural language processing) OR (nlp)) AND ((cardiology) OR (cardiac) OR (cardiovascular))                                                                                                                                                                                                            | 4/10/2020   | Arxiv               | 1/1/2015 – 4/10/2020  | None               | 4                           |
| 7. ((natural language processing) OR (nlp)) AND ((cardiology) OR (cardiac) OR (cardiovascular))                                                                                                                                                                                                          | 8/1/2021    | PubMed              | 4/1/2020 – 12/31/2020 | English            | 56                          |
| 8. ((natural language processing) OR (nlp)) AND ((cardiology) OR (cardiac) OR (cardiovascular))                                                                                                                                                                                                          | 8/1/2021    | Embase              | 4/1/2020 – 12/31/2020 | English            | 67                          |
| 9. ((natural language processing) OR (nlp)) AND ((cardiology) OR (cardiac) OR (cardiovascular))                                                                                                                                                                                                          | 8/1/2021    | Scopus              | 4/1/2020 – 12/31/2020 | English            | 52                          |
| 10. ((natural language processing) OR (nlp)) AND ((cardiology) OR (cardiac) OR (cardiovascular))                                                                                                                                                                                                         | 8/1/2021    | ACM Digital Library | 4/1/2020 – 12/31/2020 | None               | 23                          |
| 11. natural language processing) OR (nlp)) AND ((cardiology) OR (cardiac) OR (cardiovascular))                                                                                                                                                                                                           | 8/1/2021    | IEEE Explore        | 4/1/2020 – 12/31/2020 | None               | 0                           |
| 12. natural language processing) OR (nlp)) AND ((cardiology) OR (cardiac) OR (cardiovascular))                                                                                                                                                                                                           | 8/1/2021    | Arxiv               | 4/1/2020 – 12/31/2020 | None               | 0                           |
| 13. (electronic health record* OR electronic medical record*) AND (information extraction OR named entity extraction OR named entity recognition OR coreference resolution OR relation extraction OR text mining) AND (cardiology OR cardiac OR cardiovascular) NOT (natural language processing OR nlp) | 8/2/2021    | PubMed              | 1/1/2015 – 12/31/2020 | English            | 92                          |

|                                                                                                                                                                                                                                                                                                                         |          |                           |                          |         |    |
|-------------------------------------------------------------------------------------------------------------------------------------------------------------------------------------------------------------------------------------------------------------------------------------------------------------------------|----------|---------------------------|--------------------------|---------|----|
| 14. (electronic health record* OR electronic medical record*)<br>AND (information extraction OR named entity extraction OR<br>named entity recognition OR coreference resolution OR<br>relation extraction OR text mining) AND (cardiology OR<br>cardiac OR cardiovascular) NOT (natural language processing<br>OR nlp) | 8/2/2021 | Embase                    | 1/1/2015 –<br>12/31/2020 | English | 14 |
| 15. (electronic health record* OR electronic medical record*)<br>AND (information extraction OR named entity extraction OR<br>named entity recognition OR coreference resolution OR<br>relation extraction OR text mining) AND (cardiology OR<br>cardiac OR cardiovascular) NOT (natural language processing<br>OR nlp) | 8/2/2021 | Scopus                    | 1/1/2015 –<br>12/31/2020 | English | 12 |
| 16. (electronic health record* OR electronic medical record*)<br>AND (information extraction OR named entity extraction OR<br>named entity recognition OR coreference resolution OR<br>relation extraction OR text mining) AND (cardiology OR<br>cardiac OR cardiovascular) NOT (natural language processing<br>OR nlp) | 8/2/2021 | ACM<br>Digital<br>Library | 1/1/2015 –<br>12/31/2020 | None    | 77 |
| 17. (electronic health record* OR electronic medical record*)<br>AND (information extraction OR named entity extraction OR<br>named entity recognition OR coreference resolution OR<br>relation extraction OR text mining) AND (cardiology OR<br>cardiac OR cardiovascular) NOT (natural language processing<br>OR nlp) | 8/2/2021 | IEEE<br>Explore           | 1/1/2015 –<br>12/31/2020 | None    | 41 |
| 18. (electronic health record* OR electronic medical record*)<br>AND (information extraction OR named entity extraction OR<br>named entity recognition OR coreference resolution OR<br>relation extraction OR text mining) AND (cardiology OR<br>cardiac OR cardiovascular) NOT (natural language processing<br>OR nlp) | 8/2/2021 | Arxiv                     | 1/1/2015 –<br>12/31/2020 | None    | 0  |

| <b>Supplemental Table 2. Detailed exclusion cascade</b> |                            |                             |              |
|---------------------------------------------------------|----------------------------|-----------------------------|--------------|
|                                                         | <b>Round 1: April 2020</b> | <b>Round 2: August 2021</b> | <b>Total</b> |
| <b>Retrieved</b>                                        | 654                        | 434                         | 1,088        |
| Pubmed                                                  | 200                        | 148                         | 348          |
| Scopus                                                  | 161                        | 64                          | 225          |
| Embase                                                  | 159                        | 81                          | 240          |
| ACM Digital Library                                     | 109                        | 100                         | 209          |
| IEEE Explore                                            | 21                         | 41                          | 62           |
| Arxiv                                                   | 4                          | 0                           | 4            |
| <b>Duplicates excluded</b>                              | 192                        | 69                          | 261          |
| <b>Title/ abstract: excluded</b>                        | 268                        | 339                         | 607          |
| Non-cardiology focus                                    | 148                        | 178                         | 326          |
| No NLP focus/details                                    | 87                         | 94                          | 181          |
| Duplicate                                               | 31                         | 19                          | 50           |
| Non-English                                             | 2                          | 0                           | 2            |
| Review/perspective article                              | 0                          | 22                          | 22           |
| Abstract only                                           | 0                          | 25                          | 25           |
| Outside of date range                                   | 0                          | 1                           | 1            |
| <b>Full-text: excluded</b>                              | 161                        | 22                          | 183          |
| Non-cardiology focus                                    | 59                         | 6                           | 65           |
| No NLP focus/details                                    | 42                         | 10                          | 52           |
| Similar research study                                  | 13                         | 0                           | 13           |
| Abstract only                                           | 35                         | 4                           | 39           |
| Review/perspective article                              | 12                         | 0                           | 12           |
| Outside of date range                                   | 0                          | 2                           | 2            |
| <b>Records included</b>                                 | 33                         | 4                           | 37           |

**Supplemental Table 3.** Patient populations, datasets, and NLP methods of included studies

|                                      | Patient population                                  | Patient sample size | Patient demographic characteristics                                                                             | Setting or dataset                                                                                                                   | No. of documents | Document types                                      | NLP Tools and Methods                                                                                                                                                                          | NLP Evaluation Methods                                                                               |
|--------------------------------------|-----------------------------------------------------|---------------------|-----------------------------------------------------------------------------------------------------------------|--------------------------------------------------------------------------------------------------------------------------------------|------------------|-----------------------------------------------------|------------------------------------------------------------------------------------------------------------------------------------------------------------------------------------------------|------------------------------------------------------------------------------------------------------|
| Adekanattu et al, 2019 <sup>44</sup> | Patients undergoing echocardiogram                  | 600                 | Not reported                                                                                                    | 3 academic medical centers in the US and the MIMIC III database                                                                      | 600              | Echocardiogram reports                              | Information extraction using <i>EchoExtractor</i> tool, implemented through <i>Leo</i> NLP system                                                                                              | Manual annotation by 2 clinicians and 1 researcher                                                   |
| Alnazzawi et al, 2016 <sup>29</sup>  | Heart failure patients                              | Not reported        | Not reported                                                                                                    | PhenoCHF corpus: discharge summaries (a subset of the documents from the i2b2 recognizing obesity challenge) and scientific articles | 310              | Discharge notes (n=300); scientific articles (n=10) | Named entity recognition with normalization methods (novel tool: <i>PhenoNorm</i> )                                                                                                            | Previously annotated gold standard corpora linking entity mentions to other terminological resources |
| Bean et al, 2019 <sup>22</sup>       | Hospitalized AF patients                            | 10,030              | Mean age 75.3 (SD 12.3); 56.6% male                                                                             | Single hospital in the United Kingdom                                                                                                | 17,387           | Discharge summaries                                 | Named entity recognition (previously developed tool: <i>SemEHR</i> )                                                                                                                           | Manual annotation by two expert clinicians                                                           |
| Bielinski et al, 2015 <sup>30</sup>  | Heart Failure patients                              | 110,110             | MayoGC: mean age 65 (SD 12); Group Health: mean age 90 (SD 10); sex and race reported separately by HFpEF/HFrEF | eMERGE Cohort and multiple Mayo Clinic cohorts                                                                                       | 110,110          | Genomic data; inpatient and outpatient notes        | Sectionizer to detect note sections and rule-based methods to identify concepts and assign status modifiers (positive, negative, probable) (previously developed tool: <i>MedTagger</i> )      | Manual annotation by trained medical chart abstractors and nurse abstractors                         |
| Eggerth et al, 2020 <sup>42</sup>    | Heart failure patients                              | 106                 | Mean age 71.1 (SD 12.1), 30% male                                                                               | Austrian HF disease management network HerzMobil Tirol                                                                               | 3,952            | Outpatient collaborative care notes                 | Classification: Bag-of-words model; tokenization: spaCy; classification: binary classifier trained using stochastic gradient descent learning with the machine-learning framework scikit-learn | Manual annotation (number of annotators not reported)                                                |
| Esteban et al, 2017 <sup>15</sup>    | Cardiovascular and cerebrovascular disease patients | 1,106               | Not reported                                                                                                    | Single hospital in Argentina                                                                                                         | 1,106            | Inpatient, outpatient, emergency room notes         | Named entity recognition and rule-based methods                                                                                                                                                | Manual annotation by 3 family physicians                                                             |
| Evans et al, 2016 <sup>36</sup>      | Hospitalized HF patients                            | 16,971              | Not reported                                                                                                    | Regional health system in the US                                                                                                     | Not specified    | Inpatient notes                                     | Key term search                                                                                                                                                                                | The entire risk prediction model                                                                     |

|                                        |                                               |              |                                                             |                                                                                          |               |                                       |                                                                                                                                           |                                                                                    |
|----------------------------------------|-----------------------------------------------|--------------|-------------------------------------------------------------|------------------------------------------------------------------------------------------|---------------|---------------------------------------|-------------------------------------------------------------------------------------------------------------------------------------------|------------------------------------------------------------------------------------|
|                                        |                                               |              |                                                             |                                                                                          |               |                                       |                                                                                                                                           | (but not NLP alone) was compared with and without unstructured data.               |
| Galper et al, 2018 <sup>31</sup>       | Patients receiving TAVR or Mitraclip          | Not reported | Not reported                                                | FDA's MAUDE system for post-market surveillance and Transcatheter Valve Therapy Registry | 4,951         | Registry reports, post-market reports | Named entity recognition, word embeddings (Novel tool: <i>Boomerang NLP</i> )                                                             | Manual annotation                                                                  |
| Garvin et al, 2018 <sup>39</sup>       | Hospitalized HF patients                      | 1,083        | Not reported                                                | 8 VA medical centers                                                                     | 45,703        | Inpatient notes                       | Key term search, rule-based and machine learning methods (novel tool: <i>CHIEF</i> )                                                      | Manual annotation by 2 independent reviewers; cardiologist resolved conflicts      |
| Hu et al, 2016 <sup>19</sup>           | Hospitalized acute coronary syndrome patients | 2,930        | Mean age 62.3 (SD 12.1) years; 71% male                     | Single hospital in China                                                                 | 2,930         | Inpatient admission notes             | Rule-based methods and machine learning (conditional random fields)                                                                       | Manual annotation by 3 physicians                                                  |
| Hu et al, 2019 <sup>27</sup>           | Patients who received CRT                     | 990          | Mean age 71.6 (SD 11.8), 78.1% male, 87.2% White            | Partners Healthcare Research Patient Data Registry                                       | Not specified | Inpatient notes                       | Word embeddings and bag-of-words models                                                                                                   | Held-out testing set to evaluate entire machine learning algorithm (not NLP alone) |
| Jonnalagadda et al, 2017 <sup>40</sup> | HFpEF patients                                | 3,200        | Not reported                                                | Academic medical center in the US                                                        | 1,934,640     | Inpatient notes                       | Named entity recognition                                                                                                                  | Manual annotation by experienced clinical research coordinator                     |
| Kaspar et al, 2018 <sup>31</sup>       | HF patients                                   | 71,625       | Age 26% <65 years; 28% 65-74 years, 50% >74 years; 59% male | Single tertiary care facility in Germany                                                 | 71,625        | Inpatient notes                       | Key term search                                                                                                                           | Manual annotation by 1 physician                                                   |
| Leiter et al, 2020 <sup>43</sup>       | HFrEF patients undergoing CRT                 | 990          | Mean age 71.2 (SD 12.2) years, 80.9% male, 86.1% White      | Partners HealthCare Research Patient Data Registry                                       | 10,870        | Discharge notes                       | Deep NLP algorithm for information extraction, Graph-IE, using local sequential and nonlocal coreferential dependencies between the words | Manual annotation by three study team members                                      |
| Liu et al, 2019 <sup>37</sup>          | Hospitalized HF patients                      | Not reported | Not reported                                                | MIMIC III database                                                                       | 13,746        | Discharge notes                       | Machine learning methods                                                                                                                  | Basic random forest machine                                                        |

|                                     |                                                                |           |                                                   |                                                                          |               |                                                                |                                                                                                             |                                                                                                             |
|-------------------------------------|----------------------------------------------------------------|-----------|---------------------------------------------------|--------------------------------------------------------------------------|---------------|----------------------------------------------------------------|-------------------------------------------------------------------------------------------------------------|-------------------------------------------------------------------------------------------------------------|
|                                     |                                                                |           |                                                   |                                                                          |               |                                                                | (convolutional neural networks)                                                                             | learning algorithm                                                                                          |
| Mahajan et al, 2019 <sup>38</sup>   | Hospitalized HF patients                                       | 1,629     | Not reported                                      | 6 VA medical centers                                                     | 136,963       | Inpatient notes                                                | General information extraction methods (details not provided)                                               | Held out validation set; compared to structured predictors alone and combined structured/unstructured model |
| Moon et al, 2019 <sup>26</sup>      | Hypertrophic cardiomyopathy patients                           | 200       | Mean age 61, 55% male, 89% White                  | Mayo Hypertrophic Cardiomyopathy Registry                                | 16,270        | Inpatient notes                                                | Rule-based methods and named entity recognition (previously developed tool: <i>MedTagger</i> )              | Manual annotation by 2 reviewers, billing codes, patient surveys                                            |
| Moon et al, 2020 <sup>25</sup>      | Hypertrophic cardiomyopathy patients                           | 1,127     | Not reported                                      | Academic medical center in the US                                        | 687           | ICD interrogation reports and electrophysiology notes          | Rule-based methods (previously developed tool: <i>MedTagger</i> )                                           | Manual annotation by 2 reviewers                                                                            |
| Nath et al, 2016 <sup>45</sup>      | Cardiomyopathy patients                                        | 1,683     | Mean age 67.9 (SD 13.9), 67.6% male               | Academic medical center in the US                                        | 15,116        | Echocardiogram reports                                         | Rule-based methods to identify key terms and relationships between concepts (novel tool: <i>EchoInfer</i> ) | Manual annotation by 2 reviewers, conflicts resolved by third reviewer                                      |
| Owlia et al, 2019 <sup>16</sup>     | Patients with stable angina                                    | 6,556,919 | Mean age 66.6 (SD 9.8) years; 99% male; 81% White | Veterans Health Administration (VA) clinical and administrative database | 1,856,340     | Inpatient and outpatient notes                                 | Named entity recognition and rule-based methods (previously developed tool: <i>Leo</i> )                    | Chex validation tool and eHOST applications applied to held-out validation dataset                          |
| Patel et al, 2018 <sup>32</sup>     | HFpEF patients                                                 | 80,248    | Mean age 72 years; 96% male; 88% White            | National VA healthcare database                                          | Not specified | Inpatient and outpatient notes                                 | Named entity recognition and rule-based methods (previously developed tool: <i>Leo</i> )                    | Manual annotation by 3 reviewers                                                                            |
| Patterson et al, 2017 <sup>48</sup> | HIV infected and uninfected patients undergoing echocardiogram | 54,747    | Not reported                                      | National VA healthcare database                                          | 445,487       | Outpatient notes, echocardiogram reports, radiology reports    | Named entity recognition and rule-based methods (previously developed tool: <i>Leo</i> )                    | Manual annotation                                                                                           |
| Rosier et al, 2016 <sup>24</sup>    | AF patients                                                    | 60        | Not reported                                      | Academic medical center in France                                        | 1,783         | Inpatient and outpatient notes, lab reports, radiology reports | Key term search                                                                                             | Manual annotation by 2 physicians                                                                           |

|                                      |                                                               |              |                                                                                                                        |                                                                                                                                   |               |                                                                                                   |                                                                                                                          |                                                                                                    |
|--------------------------------------|---------------------------------------------------------------|--------------|------------------------------------------------------------------------------------------------------------------------|-----------------------------------------------------------------------------------------------------------------------------------|---------------|---------------------------------------------------------------------------------------------------|--------------------------------------------------------------------------------------------------------------------------|----------------------------------------------------------------------------------------------------|
| Safarova et al, 2016 <sup>17</sup>   | Patients with elevated low-density lipoprotein ( $\geq 190$ ) | 6,547        | Mean age 64.7 (SD 14.7) years; 45% male; 94% White                                                                     | Mayo Employee and Community Health (ECH) system                                                                                   | 6,547         | Outpatient notes                                                                                  | Named entity recognition (previously developed tool: <i>MedTagger</i> )                                                  | Manual annotation by 1 physician                                                                   |
| Shah et al, 2019 <sup>18</sup>       | Patients with myocardial infarction                           | 2,000        | Median age 75 (IQR 63-83) years; 61% male                                                                              | Clinical Practice Research Datalink (CPRD), a population-based source of longitudinal clinical information in the United Kingdom. | 31,913        | Outpatient notes                                                                                  | Key term search and rule-based methods (novel tool: <i>Freetext Matching Algorithm</i> )                                 | Manual annotation by 2 physicians                                                                  |
| Shah et al, 2020a <sup>23</sup>      | AF patients                                                   | 786          | Patients identified with AF: mean age 69.0 (SD 14.2) years, 60.6% male, 89.1% White                                    | Academic medical center in the US                                                                                                 | 22,000        | Inpatient and outpatient notes, lab reports, radiology reports                                    | Key term search (previously developed tool: <i>pyConText</i> )                                                           | Manual annotation by 3 clinicians                                                                  |
| Shah et al, 2020b <sup>21</sup>      | AF patients                                                   | 561          | Site 1: Mean age 67.7 (SD 15.0); 43% female; 83-84% White<br>Site 2: Mean age 70.0 (SD 15.1); 38% female; 61-84% White | Two academic medical centers in the US                                                                                            | 1,800,000     | Patient, visit, clinical, operational, financial, and research data from clinical data warehouses | Model built using logistic regression, extra trees, and naive Bayes classifiers                                          | Manual annotation                                                                                  |
| Shi et al, 2015 <sup>46</sup>        | Congenital heart disease patients                             | Not reported | Not reported                                                                                                           | Open-source forum associated with a hospital in China                                                                             | 3,464         | Echocardiogram reports                                                                            | Named entity recognition                                                                                                 | Manual annotation by 5 reviewers                                                                   |
| Toerper et al, 2016 <sup>20</sup>    | Patients undergoing cardiac catheterization                   | 13,932       | 32% age 70 years and older; 64% male                                                                                   | Single urban hospital in the US                                                                                                   | Not specified | Inpatient and outpatient notes                                                                    | Key term search and rule-based methods                                                                                   | The entire forecasting algorithm (but not NLP alone) was validated using 10-fold cross-validation. |
| Topaz et al, 2017 <sup>41</sup>      | Hospitalized HF patients                                      | 8,901        | Mean age 72.5 (SD 14.3) years; 57.2% male; 82.7% White                                                                 | Academic medical center in the US                                                                                                 | 8,901         | Discharge summaries                                                                               | Named entity recognition, semantic analysis, and rule-based methods (previously developed tool: <i>MTERMS</i> )          | Manual annotation by 2 reviewers                                                                   |
| Valtchinov et al, 2020 <sup>49</sup> | Patients with cardiac implantable devices                     | Not reported | Not reported                                                                                                           | Academic medical center in the US                                                                                                 | 240,854       | Inpatient and outpatient notes, radiology reports, procedure notes, microbiology reports          | Expert-derived system, <i>QPID</i> , and ontology-derived rule-based methods (previously developed tool: <i>cTakes</i> ) | Manual annotation by 1 researcher                                                                  |

|                                     |                                                                                                                                           |              |                                            |                                                 |           |                                                                                 |                                                                                                                                   |                                                               |
|-------------------------------------|-------------------------------------------------------------------------------------------------------------------------------------------|--------------|--------------------------------------------|-------------------------------------------------|-----------|---------------------------------------------------------------------------------|-----------------------------------------------------------------------------------------------------------------------------------|---------------------------------------------------------------|
| Viani et al, 2019 <sup>28</sup>     | General cardiology patients                                                                                                               | Not reported | Not reported                               | Molecular cardiology lab at a hospital in Italy | 75        | Notes describing clinical and family history, tests, medications, and diagnoses | Recurrent neural networks (RNNs)                                                                                                  | Manual annotation by 2 researchers                            |
| Waghlikar et al, 2018 <sup>33</sup> | HFrEF patients                                                                                                                            | 57,158       | Not reported                               | Academic medical center in the US               | 46,634    | Echocardiogram reports                                                          | Key term search                                                                                                                   | Manual annotation by clinical experts                         |
| Wang et al, 2015 <sup>34</sup>      | Hospitalized HF patients                                                                                                                  | 18,295       | Not reported                               | Health Information Exchange in the US           | 2,139,299 | Inpatient and outpatient notes                                                  | Machine learning methods (random forest/decision tree models)                                                                     | Manual annotations by 2 physicians                            |
| Xie et al, 2017 <sup>47</sup>       | Patients undergoing echocardiogram                                                                                                        | 621,856      | 51.2% age $\geq$ 65;<br>49.5% male         | Large regional health system in the US          | 621,856   | Echocardiogram reports                                                          | Key term search and normalization methods                                                                                         | Manual annotation by 1 cardiologist                           |
| Zhang et al, 2018 <sup>35</sup>     | HF patients with a CRT device                                                                                                             | 36,276       | Not reported                               | Academic medical center in the US               | 6,174     | Inpatient and outpatient notes                                                  | Rule-based and multiple machine-learning methods (bag-of-words, support vector machine, logistical regression, and random forest) | Structured documentation of NYHA class                        |
| Zheng et al, 2020 <sup>50</sup>     | Patients presenting to the emergency department who had a troponin laboratory test and underwent an ETT within 30 days of their ED visits | 5,214        | Mean age 56 years, 49.6% male, 48.1% white | Large regional health system in the US          | 5,214     | Exercise treadmill test reports                                                 | Rule-based methods to identify key terms and relationships between concepts                                                       | Manual review by one emergency physician and one cardiologist |

AF: atrial fibrillation; CRT: cardiac resynchronization therapy; EHR: electronic health record; HF: Heart failure; HFrEF: Heart failure with reduced ejection fraction; HFpEF: Heart failure with preserved ejection fraction; NLP: natural language processing



**Supplemental Table 4.** Purpose and findings of included studies by cardiac disease focus

|                                    | Study purpose                                                                                                                                                                                                                                                 | Performance of NLP algorithm                                              |                                                                                   | Study outcomes                                                                                                                                                                                                                                       |
|------------------------------------|---------------------------------------------------------------------------------------------------------------------------------------------------------------------------------------------------------------------------------------------------------------|---------------------------------------------------------------------------|-----------------------------------------------------------------------------------|------------------------------------------------------------------------------------------------------------------------------------------------------------------------------------------------------------------------------------------------------|
| <b>Coronary Artery Disease</b>     |                                                                                                                                                                                                                                                               |                                                                           |                                                                                   |                                                                                                                                                                                                                                                      |
| Esteban et al, 2017 <sup>15</sup>  | To assess the sensitivity, specificity, and agreement level of a rule-based algorithm for the detection of cardiovascular and cerebrovascular disease.                                                                                                        | Sensitivity: 96-99%<br>Specificity: 86-97%                                |                                                                                   | The developed algorithm used only standardized and non-standardized coded terms within an EHR to properly detect clinically relevant events and symptoms of cardiovascular and cerebrovascular disease.                                              |
| Hu et al, 2016 <sup>19</sup>       | To explore major adverse cardiovascular event (MACE) prediction in a proactive manner using inpatient admission records.                                                                                                                                      | AUC: 72%                                                                  |                                                                                   | NLP algorithm predicted MACE for acute coronary syndrome patients at the early stage of their hospitalizations significantly better than two well-known acute coronary syndrome risk score tools.                                                    |
| Owlia et al, 2019 <sup>16</sup>    | To use NLP to extract Canadian Cardiovascular Society (CCS) angina severity classifications from clinical notes and determine associations between CCS and all-cause mortality and healthcare utilization.                                                    | PPV: 93%<br>Sensitivity: 76%                                              |                                                                                   | NLP-extracted CCS classification was positively associated with all-cause mortality and healthcare utilization, demonstrating the prognostic importance of anginal symptom assessment and documentation.                                             |
| Safarova et al, 2016 <sup>17</sup> | To develop an ePhenotyping algorithm for rapid identification of familial hypercholesterolemia.                                                                                                                                                               | PPV and NPV $\geq$ 85%                                                    |                                                                                   | The algorithm identified patient with familial hypercholesterolemia, many of whom had not been previously identified.                                                                                                                                |
| Shah et al, 2019 <sup>18</sup>     | To describe the contribution of outpatient notes in the 90 days prior to a myocardial infarction to the recording of information about myocardial infarction (subtype, left ventricular function, laboratory results and symptoms) and cause of death.        | PPV: 83-92%<br>Sensitivity: 17-41%<br>Specificity: 96-97%                 |                                                                                   | Outpatient notes contained information such as symptoms, results and specific diagnoses that could be useful in characterizing a myocardial infarction.                                                                                              |
| Toerper et al, 2016 <sup>20</sup>  | To develop and prospectively evaluate a web-based tool that forecasts the daily bed need for admissions from the cardiac catheterization laboratory using structured and unstructured EHR data.                                                               | AUC: 72%                                                                  |                                                                                   | The forecast model identified older age, male gender, invasive procedures, coronary artery bypass grafts, and a history of congestive heart failure as qualities indicating a patient was at increased risk for admission following catheterization. |
| <b>Electrophysiology</b>           |                                                                                                                                                                                                                                                               |                                                                           |                                                                                   |                                                                                                                                                                                                                                                      |
| Bean et al, 2019 <sup>22</sup>     | To develop and validate an NLP risk scoring pipeline, explore trends in antithrombotic medication use for AF, and quantify the association between antithrombotic medication use and relevant clinical patient-level variables.                               | PPV: 95%<br>Sensitivity: 97%<br>F-score: 96%<br>Accuracy: 98%             |                                                                                   | Automatic risk scores were in strong agreement with the two independent experts for CHA2DS2-VASc. Agreement was lower for HAS-BLED.                                                                                                                  |
| Hu et al, 2019 <sup>27</sup>       | To apply machine learning to create an algorithm that predicts CRT outcomes using EHR data.                                                                                                                                                                   | PPV: 79%<br>Sensitivity: 26%<br>F-score: 77%<br>Accuracy: 65%<br>AUC: 75% |                                                                                   | A machine learning model that leveraged readily available EHR data and clinical notes identified a subset of CRT patients who may not benefit from CRT before the procedure.                                                                         |
| Moon et al, 2019 <sup>26</sup>     | To develop and deploy NLP algorithms for automated extraction of syncope, family history of sudden cardiac death, and family history of hypertrophic cardiomyopathy from clinical narratives.                                                                 | NPV: 90-97%<br>Sensitivity: 91-95%<br>Specificity: 90-98%                 |                                                                                   | Automated extraction of the desired data elements using NLP is feasible and has promise to increase efficiency of workflow for providers managing hypertrophic cardiomyopathy patients.                                                              |
| Moon et al, 2020 <sup>25</sup>     | To compare the performance of unstructured notes to structured device data in determining heart rhythm from implantable cardioverter defibrillators (ICDs) and whether patients with hypertrophic cardiomyopathy received appropriate therapy from their ICD. | <u>NLP only model</u><br>F-score: 0.92-0.98                               | <u>Structured data only model</u><br>F-score: 0.45-0.78                           | The NLP methods on unstructured data performed significantly better in identifying rhythm and therapy delivered from ICDs than the methods using structured data only.                                                                               |
| Rosier et al, 2016 <sup>24</sup>   | To design a prototype mechanism for AF alerts in remote monitoring of CIEDs, and to evaluate the efficacy and safety of this prototype.                                                                                                                       | Accuracy: 98%                                                             |                                                                                   | The alert classification system including the NLP classifier had high agreement (kappa= 0.93) with the manual annotation of alerts.                                                                                                                  |
| Shah et al, 2020a <sup>23</sup>    | To compare the samples and characteristics from each model, and oral anticoagulant treatment rates in each sample, of various models using structured and unstructured data to identify AF patients in EHRs.                                                  | <u>NLP only model</u><br>Sensitivity: 97%                                 | <u>Combined NLP/structured data model</u><br>Sensitivity: 90%<br>Specificity: 87% | Models that included unstructured combined with structured data were the most accurate at identifying patients with AF.                                                                                                                              |

|                                        |                                                                                                                                                                                                                        |                                                                                                                                                                            |          |                                                                                                                                                                                            |
|----------------------------------------|------------------------------------------------------------------------------------------------------------------------------------------------------------------------------------------------------------------------|----------------------------------------------------------------------------------------------------------------------------------------------------------------------------|----------|--------------------------------------------------------------------------------------------------------------------------------------------------------------------------------------------|
|                                        |                                                                                                                                                                                                                        | Specificity: 63%<br>AUC: 80%                                                                                                                                               | AUC: 89% |                                                                                                                                                                                            |
| Shah et al, 2020b <sup>21</sup>        | To create a portable NLP algorithm to identify patients with atrial fibrillation (AF) using text alone.                                                                                                                | <u>Sensitivity: 90-93%</u><br><u>Specificity: 71-89%</u><br><u>AUC: 80-91%</u><br><u>F-score: 93-94%</u>                                                                   |          | The NLP algorithm was able to identify patients with AF using text alone with >90% F-score at 2 separate sites, creating opportunities for precise, high-throughput cohort identification. |
| <b>General cardiology</b>              |                                                                                                                                                                                                                        |                                                                                                                                                                            |          |                                                                                                                                                                                            |
| Viani et al, 2019 <sup>28</sup>        | To apply novel recurrent neural networks (RNNs) for event extraction from medical reports in the cardiology domain written in Italian.                                                                                 | RNN classifier alone:<br><u>PPV: 88%</u><br><u>Sensitivity: 89%</u><br><br>RNN and dictionary lookup:<br><u>PPV: 87%</u><br><u>Sensitivity: 92%</u><br><u>F-score: 90%</u> |          | Integrating a well-performing RNN-based classifier with a standard knowledge-based approach can be a good strategy to extract information from clinical text in non-English languages.     |
| <b>Heart Failure</b>                   |                                                                                                                                                                                                                        |                                                                                                                                                                            |          |                                                                                                                                                                                            |
| Alnazzawi et al, 2016 <sup>29</sup>    | To develop a novel method, PhenoNorm, which integrates similarity measures to allow automatic linking of phenotype concept mentions to known concepts in the UMLS Metathesaurus, a biomedical terminological resource. | F-score: 76-83%<br>Accuracy: 77-86%                                                                                                                                        |          | PhenoNorm outperforms a number of alternative methods applied to the same task and has wider utility.                                                                                      |
| Bielinski et al, 2015 <sup>30</sup>    | To develop and validate an EHR-based algorithm to accurately identify HF patients with characterization of HFpEF and HFrfEF.                                                                                           | PPV: 80-94%<br>NPV: 98-100%<br>Sensitivity: 71-100%<br>Specificity: 97-99%                                                                                                 |          | The developed algorithm was expanded to include definite, probable, and possible HF based on the degree of confidence of the classification to capture HF cases.                           |
| Eggerth et al, 2020 <sup>42</sup>      | To develop classifiers for automated categorization of collaboration notes documenting medication management using NLP.                                                                                                | PPV: 75-99%<br>Sensitivity: 44-82%<br>F-score: 55-90%                                                                                                                      |          | The classifier achieved high accuracy and could be used to evaluate medication adherence and other aspects of management among HF patients.                                                |
| Evans et al, 2016 <sup>36</sup>        | To develop and evaluate an automated identification and predictive hospitalized HF patients' risk of 30-day readmissions and mortality.                                                                                | PPV: 98%<br>Sensitivity: 95%<br>Specificity: 98%                                                                                                                           |          | The addition of NLP-identified HF patients significantly improved model performance in identification and prediction activities.                                                           |
| Garvin et al, 2018 <sup>39</sup>       | To accurately automate a United States Department of Veterans Affairs quality measure for inpatients with HF.                                                                                                          | PPV: 89-99%<br>Sensitivity: 27-100%<br>F-score: 42-100%                                                                                                                    |          | The NLP methods provided accurately classified patients with HF with high performance for meeting care metrics.                                                                            |
| Jonnalagadda et al, 2017 <sup>40</sup> | To develop a high recall prescreening algorithm for recruiting patients into a multicenter, randomized controlled study.                                                                                               | PPV: 86%<br>Sensitivity: 95%                                                                                                                                               |          | Automated identification of HFpEF patients who are appropriate candidates for a clinical trial is feasible and time efficient.                                                             |
| Kaspar et al, 2018 <sup>31</sup>       | To approximate the "true number" of patients suffering from HF at a tertiary care center.                                                                                                                              | PPV: 71-96%<br>Sensitivity: 60-92%<br>F-score: 74-86%                                                                                                                      |          | The NLP-based search algorithm markedly improved diagnostic accuracy compared to ICD codes alone.                                                                                          |
| Leiter et al, 2020 <sup>43</sup>       | To develop, train, and evaluate a deep NLP algorithm to identify documented symptoms from unprocessed EHR notes in a cohort of patients with HFrfEF who would subsequently undergo CRT.                                | PPV: 78%<br>Sensitivity: 67%<br>Accuracy: 99%<br>F-score: 72%                                                                                                              |          | The deep NLP algorithm trained to capture symptoms in patients with CHF who received CRT showed promising precision (PPV) and recall.                                                      |
| Liu et al, 2019 <sup>37</sup>          | To evaluate a deep learning approach to predict heart failure readmission from clinical notes.                                                                                                                         | F-score: 73-76%                                                                                                                                                            |          | Deep learning models outperformed the regular models in prediction tasks.                                                                                                                  |
| Mahajan et al, 2019 <sup>38</sup>      | To use machine learning methods such as statistical NLP for predicting the risk of readmission for heart failure.                                                                                                      | AUC: 51-65%                                                                                                                                                                |          | Predictive models using both structured and unstructured EHR data best predicted HF readmissions compared to models using only structured and only unstructured data.                      |
| Patel et al, 2018 <sup>32</sup>        | To use NLP extraction of LVEF values and algorithm development and validation to derive an algorithm that is able to curate a cohort of HFpEF from a large national database.                                          | PPV: 96%<br>NPV: 87%<br>Sensitivity: 88%                                                                                                                                   |          | An algorithm using structured and unstructured EHR data led to the creation of a HFpEF cohort within the health system.                                                                    |

|                                      |                                                                                                                                                                                                                  |                                                                                    |                                                                                                                                                                                                   |
|--------------------------------------|------------------------------------------------------------------------------------------------------------------------------------------------------------------------------------------------------------------|------------------------------------------------------------------------------------|---------------------------------------------------------------------------------------------------------------------------------------------------------------------------------------------------|
|                                      |                                                                                                                                                                                                                  | Specificity: 96%                                                                   |                                                                                                                                                                                                   |
| Topaz et al, 2017 <sup>41</sup>      | To identify HF patients with ineffective self-management by using NLP on a subsample of discharge.                                                                                                               | PPV: 95%<br>Sensitivity: 79%                                                       | NLP successfully identified HF self-management behaviors in discharge notes. Specific types of self-management deficits were significantly associated with readmissions.                          |
| Wagholikar et al, 2018 <sup>33</sup> | To use a regular expression-based NLP system to extract LVEF from echocardiogram reports to identify patients presenting with HF <sub>rEF</sub> for driving a population-based therapeutic intervention program. | Accuracy: 100%                                                                     | The regular expression-based approach accurately extracted LVEF from echocardiograms and was useful for identifying HF <sub>rEF</sub> patients.                                                   |
| Wang et al, 2015 <sup>34</sup>       | To identify HF cases from both EHR codified and NLP found cases.                                                                                                                                                 | PPV: 91%                                                                           | A HF case finding algorithm including NLP was developed, tested, prospectively validated, and integrated into the Health Information Exchange live system.                                        |
| Zhang et al, 2018 <sup>35</sup>      | To extract NYHA class for patients with a CRT device from electronic health records.                                                                                                                             | <u>Rule-based methods</u><br>PPV: 95%<br>Sensitivity: 92%<br>F-score: 94%          | <u>Machine-learning methods</u><br>PPV: 85-95%<br>Sensitivity: 81-93%<br>F-score: 83-94%                                                                                                          |
| <b>Imaging</b>                       |                                                                                                                                                                                                                  |                                                                                    |                                                                                                                                                                                                   |
| Adekanattu et al, 2019 <sup>44</sup> | To investigate the portability of an NLP system to extract 27 key cardiac concepts from echocardiogram reports.                                                                                                  | PPV: 6-100%<br>Sensitivity: 25-100%<br>F-score: 11-100                             | The performance of the NLP methods varied widely based on the cardiac concept of interest.                                                                                                        |
| Nath et al, 2016 <sup>45</sup>       | To explore the feasibility and reliability of using NLP for large-scale and targeted extraction of multiple data elements from echocardiogram reports.                                                           | PPV: 94%<br>Sensitivity: 92%<br>F-score: 93                                        | The NLP methods reliably extracted relevant data elements from echocardiography reports.                                                                                                          |
| Patterson et al, 2017 <sup>48</sup>  | To develop a robust and efficient clinical information extraction system utilizing both coded and unstructured data towards the goal of refining heart failure phenotypes.                                       | PPV: 94-98%<br>Sensitivity: 74-82%                                                 | The NLP methods that were developed feasibly and effectively extracted HF-related information.                                                                                                    |
| Shi et al, 2015 <sup>46</sup>        | To extract anatomic site-related features in echocardiogram reports and predict risk level.                                                                                                                      | <u>Rule-based methods</u><br>PPV: 51%<br>Sensitivity: 43%<br>F-score: 44           | <u>Machine learning methods</u><br>PPV: 47%<br>Sensitivity: 42%<br>F-score: 43<br>AUC: 61%                                                                                                        |
| Valtchinov et al, 2020 <sup>49</sup> | To assess two NLP approaches (expert-derived and ontology-derived) to identify patients with implantable devices that pose safety risks for MRI.                                                                 | <u>Expert-derived NLP</u><br>Sensitivity: 88%<br>Specificity: 82%<br>Accuracy: 83% | <u>Ontology-derived NLP</u><br>Sensitivity: 96%<br>Specificity: 92%<br>Accuracy: 91%                                                                                                              |
| Xie et al, 2017 <sup>47</sup>        | To develop a computerized NLP algorithm to extract EF from echocardiogram reports.                                                                                                                               | PPV: 97%<br>Sensitivity: 95%                                                       | The NLP algorithm achieved high performance.                                                                                                                                                      |
| Zheng et al, 2020 <sup>50</sup>      | To develop and validate an automated method to interpret exercise treadmill test results and test the associations between exercise treadmill test results with 30-day patient outcomes in a large population.   | Sensitivity: 96%<br>Specificity: 95%                                               | NLP effectively extracted relevant information from exercise treadmill tests. Most patients were at low risk of severe 30-day outcomes (myocardial infarction, death) and had normal ETT results. |
| <b>Valvular Disease</b>              |                                                                                                                                                                                                                  |                                                                                    |                                                                                                                                                                                                   |

|                                                                                                                                                                                                                                                                                           |                                                                                                                                                                                                                                                  |                                                                  |                                                                                                                                                                                     |
|-------------------------------------------------------------------------------------------------------------------------------------------------------------------------------------------------------------------------------------------------------------------------------------------|--------------------------------------------------------------------------------------------------------------------------------------------------------------------------------------------------------------------------------------------------|------------------------------------------------------------------|-------------------------------------------------------------------------------------------------------------------------------------------------------------------------------------|
| Galper et al, 2018 <sup>51</sup>                                                                                                                                                                                                                                                          | To analyze reported adverse events and device problems for both TAVR and Mitraclip and compared rates between unstructured data in FDA's MAUDE system for post-market surveillance and structured data the Transcatheter Valve Therapy Registry. | <u>NLP methods (vs structured data)</u><br>R <sup>2</sup> : 0.86 | NLP enabled identification of the most common events associated with TAVR and Mitraclip procedures. Event rates derived from the two data sources were not significantly different. |
| AF: atrial fibrillation; CRT: cardiac resynchronization therapy; EHR: electronic health record; HF: Heart failure; HF <sub>r</sub> EF: Heart failure with reduced ejection fraction; HF <sub>p</sub> EF: Heart failure with preserved ejection fraction; NLP: natural language processing |                                                                                                                                                                                                                                                  |                                                                  |                                                                                                                                                                                     |
