# Supplementary material
Source: PubMed Central journal article supplement (PMC9046466)
Supplement: NIHMS1748393-supplement-Supp2.pdf [file NIHMS1748393-supplement-Supp2.pdf]

| Reviewed   | Title                                                                                                                                       | Authors                                                                                                                                                                                | Year | Journal                                                                                        | DOI                                                                                                                   | Exclusion reason     |
|------------|---------------------------------------------------------------------------------------------------------------------------------------------|----------------------------------------------------------------------------------------------------------------------------------------------------------------------------------------|------|------------------------------------------------------------------------------------------------|-----------------------------------------------------------------------------------------------------------------------|----------------------|
| April 2020 | Toward Automatic Anxiety Detection in Autism: A Real-Time Algorithm for Detecting Physiological Arousal in the Presence of Motion           | A. Puli; A. Kushki                                                                                                                                                                     | 2020 | IEEE Transactions on Biomedical Engineering                                                    | 10.1109/TBME.2019.2919273                                                                                             | Non-cardiology focus |
| April 2020 | CARE TRAJECTORY AND EARLY CLINICAL FEATURES AMONG PATIENTS WITH 99MTC-PYROPHOSPHATE POSITIVE TRANSTHYRETIN AMYLOID CARDIOMYOPATHY (ATTR-CM) | Abboud A.; Camacho A.; Nguonly A.; Fiseha N.; Bean A.; Osborne M.T.; Ibrahim N.E.; McCarthy C.P.; Tawakol A.; Ruberg F.L.; Sadjadi R.; David W.S.; Lewis G.D.; Januzzi J.L.; Gaggin H. | 2020 | Journal of the American College of Cardiology                                                  | <a href="http://dx.doi.org/10.1016/S0735-1097%2820%2931447-9">http://dx.doi.org/10.1016/S0735-1097%2820%2931447-9</a> | Abstract only        |
| April 2020 | A fully automatic cardiac segmentation method using region growing technique                                                                | Abdelaziz Daoudi; Said Mahmoudi                                                                                                                                                        | 2016 | Proceedings of the Mediterranean Conference on Pattern Recognition and Artificial Intelligence | 10.1145/3038884.3038901                                                                                               | Abstract only        |
| April 2020 | Spectroscopic Properties of Blood for Pulse Oximeter Design                                                                                 | Abeera Vaqar; Intisar Rizwan I. Haque; Tahir Zaidi                                                                                                                                     | 2019 | Proceedings of the 2019 9th International Conference on Biomedical Engineering and Technology  | 10.1145/3326172.3326205                                                                                               | No NLP focus/details |

|            |                                                                                                                             |                                                                                                                                                                                                                                     |      |                                                                                 |                                                                                                                       |                      |
|------------|-----------------------------------------------------------------------------------------------------------------------------|-------------------------------------------------------------------------------------------------------------------------------------------------------------------------------------------------------------------------------------|------|---------------------------------------------------------------------------------|-----------------------------------------------------------------------------------------------------------------------|----------------------|
| April 2020 | PREVALENCE OF TRANSTHYRETIN CARDIAC AMYLOIDOSIS IN HEART FAILURE WITH PRESERVED EJECTION FRACTION: A POPULATION BASED STUDY | Abou-Ezzeddine O.F.; Davies D.; Sexton J.A.; Scott C.G.; Fayyaz A.; Akhiyat N.; Stromme T.A.; Askew J.W.; McKie P.; Noseworthy P.; Dunlay S.; Borlaug B.; Chareonthaitawee P.; Johnson G.; Dispenzieri A.; Grogan M.; Redfield M.M. | 2020 | Journal of the American College of Cardiology                                   | <a href="http://dx.doi.org/10.1016/S0735-1097%2820%2931318-8">http://dx.doi.org/10.1016/S0735-1097%2820%2931318-8</a> | Abstract only        |
| April 2020 | A method for cohort selection of cardiovascular disease records from an electronic health record system.                    | Abrahao MTF.; Nobre MRC.; Gutierrez MA.                                                                                                                                                                                             | 2017 | International journal of medical informatics                                    | 10.1016/j.ijmedinf.2017.03.015                                                                                        | No NLP focus/details |
| April 2020 | R-Peak Detection in ECG Images using Matlab-Æ                                                                               | Aditya Verma; Kakanuru Siva Teja; Viraj Puntambekar; G. K. Rajini                                                                                                                                                                   | 2018 | Proceedings of the 2nd International Conference on Advances in Image Processing | 10.1145/3239576.3239600                                                                                               | No NLP focus/details |
| April 2020 | Natural language processing of clinical notes for identification of critical limb ischemia.                                 | Afzal N.; Mallipeddi VP.; Sohn S.; Liu H.; Chaudhry R.; Scott CG.; Kullo IJ.; Arruda-Olson AM.                                                                                                                                      | 2018 | International journal of medical informatics                                    | 10.1016/j.ijmedinf.2017.12.024                                                                                        | Non-cardiology focus |

|            |                                                                                                                      |                                                                                          |      |                                                                                                                                                      |                                                                                                       |                      |
|------------|----------------------------------------------------------------------------------------------------------------------|------------------------------------------------------------------------------------------|------|------------------------------------------------------------------------------------------------------------------------------------------------------|-------------------------------------------------------------------------------------------------------|----------------------|
| April 2020 | Identifying Peripheral Arterial Disease Cases Using Natural Language Processing of Clinical Notes.                   | Afzal N.; Sohn S.; Abram S.; Liu H.; Kullo IJ.; Arruda-Olson AM.                         | 2016 | ... IEEE-EMBS International Conference on Biomedical and Health Informatics. IEEE EMBS International Conference on Biomedical and Health Informatics | 10.1109/BHI.2016.7455851                                                                              | Non-cardiology focus |
| April 2020 | Mining peripheral arterial disease cases from narrative clinical notes using natural language processing.            | Afzal N.; Sohn S.; Abram S.; Scott CG.; Chaudhry R.; Liu H.; Kullo IJ.; Arruda-Olson AM. | 2017 | Journal of vascular surgery                                                                                                                          | 10.1016/j.jvs.2016.11.031                                                                             | Non-cardiology focus |
| April 2020 | Surveillance of Peripheral Arterial Disease Cases Using Natural Language Processing of Clinical Notes.               | Afzal N.; Sohn S.; Scott CG.; Liu H.; Kullo IJ.; Arruda-Olson AM.                        | 2017 | AMIA Joint Summits on Translational Science proceedings. AMIA Joint Summits on Translational Science                                                 |                                                                                                       | Non-cardiology focus |
| April 2020 | Voice of cancer patients: Patient experience regarding use of tyrosine kinase inhibitors in chronic myeloid leukemia | Aggarwal S.; Manish S.; Chaudhary G.; Aggarwal A.; Punetha H.; Jha J.; Gond R.K.         | 2019 | Blood                                                                                                                                                | <a href="http://dx.doi.org/10.1182/blood-2019-125195">http://dx.doi.org/10.1182/blood-2019-125195</a> | Non-cardiology focus |
| April 2020 | Computational complexity of the accessory function setting mechanism in fuzzy intellectual systems                   | Ahmad, M.A.; Tvoroshenko, I.; Baker, J.H.; Lyashenko, V.                                 | 2019 | International Journal of Advanced Trends in Computer Science and Engineering                                                                         | 10.30534/ijatcs/2019/77852019                                                                         | Non-cardiology focus |

|            |                                                                                                               |                                                                                          |      |                                                                                               |                              |                      |
|------------|---------------------------------------------------------------------------------------------------------------|------------------------------------------------------------------------------------------|------|-----------------------------------------------------------------------------------------------|------------------------------|----------------------|
| April 2020 | Mobile Sensing of Alertness, Sleep and Circadian Rhythm: Hardware & Software Platforms                        | Akane Sano; Tauhidur Rahman; Mi Zhang; Deepak Ganesan; Tanzeem Choudhury                 | 2020 | GetMobile: Mobile Comp. and Comm.                                                             | 10.1145/3379092.3379100      | Non-cardiology focus |
| April 2020 | A corpus of potentially contradictory research claims from cardiovascular research abstracts.                 | Alamri A.; Stevenson M.                                                                  | 2016 | Journal of biomedical semantics                                                               | 10.1186/s13326-016-0083-z    | No NLP focus/details |
| April 2020 | Noise-Tolerant Neural Network Approach for Electrocardiogram Signal Classification                            | Alberto Ochoa; Luis J. Mena; Vanessa G. Felix                                            | 2017 | Proceedings of the International Conference on Compute and Data Analysis                      | 10.1145/3093241.3093269      | No NLP focus/details |
| April 2020 | ECG Monitoring and Anomaly Detection Based on Compressed Measurements                                         | Alessandra Galli; Claudio Narduzzi; Giada Giorgi                                         | 2018 | Proceedings of the 2018 3rd International Conference on Biomedical Imaging, Signal Processing | 10.1145/3288200.3288206      | No NLP focus/details |
| April 2020 | Phyjama: Physiological Sensing via Fiber-enhanced Pyjamas                                                     | Ali Kiaghadi; Seyedeh Zohreh Homayounfar; Jeremy Gummeson; Trisha Andrew; Deepak Ganesan | 2019 | Proc. ACM Interact. Mob. Wearable Ubiquitous Technol.                                         | 10.1145/3351247              | No NLP focus/details |
| April 2020 | Mapping Phenotypic Information in Heterogeneous Textual Sources to a Domain-Specific Terminological Resource. | Alnazzawi N.; Thompson P.; Ananiadou S.                                                  | 2016 | PLoS one                                                                                      | 10.1371/journal.pone.0162287 | Included             |
| April 2020 | Using text mining techniques to extract phenotypic information from the PhenoCHF corpus.                      | Alnazzawi N.; Thompson P.; Batista-Navarro R.; Ananiadou S.                              | 2015 | BMC medical informatics and decision making                                                   | 10.1186/1472-6947-15-S2-S3   | Similar study        |

|            |                                                                                                                  |                                                                               |      |                                                                                                                                                                |                              |                      |
|------------|------------------------------------------------------------------------------------------------------------------|-------------------------------------------------------------------------------|------|----------------------------------------------------------------------------------------------------------------------------------------------------------------|------------------------------|----------------------|
| April 2020 | Captioning Ultrasound Images Automatically.                                                                      | Alsharid M.; Sharma H.; Drukker L.; Chatelain P.; Papageorgiou AT.; Noble JA. | 2019 | Medical image computing and computer-assisted intervention : MICCAI ... International Conference on Medical Image Computing and Computer-Assisted Intervention | 10.1007/978-3-030-32251-9_37 | Non-cardiology focus |
| April 2020 | Heart and sole - shoe-based heart monitoring: demo abstract                                                      | Amelie Bonde; Shijia Pan; Hae Young Noh; Pei Zhang                            | 2017 | Proceedings of the 16th ACM/IEEE International Conference on Information Processing in Sensor Networks                                                         | 10.1145/3055031.3055048      | No NLP focus/details |
| April 2020 | Trends in carotid imaging in the va health system following choosing wisely: An interrupted time series analysis | Anderson T.; Madden E.; Zhang S.J.; Mowery D.; Chapman W.; Keyhani S.         | 2018 | Circulation: Cardiovascular Quality and Outcomes                                                                                                               |                              | Abstract only        |
| April 2020 | CardioSounds: Real-time Auditory Assistance for Supporting Cardiac Diagnostic and Monitoring                     | Andrea Lorena Aldana Blanco; Steffen Grautoff; Thomas Hermann                 | 2017 | Proceedings of the 12th International Audio Mostly Conference on Augmented and Participatory Sound and Music Experiences                                       | 10.1145/3123514.3123542      | No NLP focus/details |

|            |                                                                                                                 |                                                  |      |                                                                                                                                   |                                                                                                                     |                            |
|------------|-----------------------------------------------------------------------------------------------------------------|--------------------------------------------------|------|-----------------------------------------------------------------------------------------------------------------------------------|---------------------------------------------------------------------------------------------------------------------|----------------------------|
| April 2020 | Editorial                                                                                                       | Anonymous.                                       | 2016 | Computer Methods and Programs in Biomedicine                                                                                      | <a href="http://dx.doi.org/10.1016/S0169-2607(2016)930568-5">http://dx.doi.org/10.1016/S0169-2607(2016)930568-5</a> | Review/perspective article |
| April 2020 | Heartbeat classification in wearables using multi-layer perceptron and time-frequency joint distribution of ECG | Anup Das; Francky Catthoor; Siebren Schaafsma    | 2018 | Proceedings of the 2018 IEEE/ACM International Conference on Connected Health: Applications, Systems and Engineering Technologies | 10.1145/3278576.3278598                                                                                             | No NLP focus/details       |
| April 2020 | Data-driven Healthcare using Affordable Sensing: Screening, Diagnosis and Therapy                               | Arpan Pal                                        | 2016 | Proceedings of the First Workshop on IoT-enabled Healthcare and Wellness Technologies and Systems                                 | 10.1145/2933566.2936014                                                                                             | Non-cardiology focus       |
| April 2020 | Clinical evaluation of generative model based monitoring and comparison with compressive sensing                | Ayan Banerjee; Sandeep K. S. Gupta               | 2015 | Proceedings of the conference on Wireless Health                                                                                  | 10.1145/2811780.2811946                                                                                             | Non-cardiology focus       |
| April 2020 | APDRChain: ANN Based Predictive Analysis of Diseases and Report Sharing Through Blockchain                      | Bagchi, S.; Chakraborty, M.; Chattopadhyay, A.K. | 2020 | Advances in Intelligent Systems and Computing                                                                                     | 10.1007/978-981-15-0361-0_8                                                                                         | No NLP focus/details       |
| April 2020 | Bridging the Global Digital Health Divide for Cardiovascular Disease.                                           | Banerjee A.                                      | 2017 | Circulation. Cardiovascular quality and outcomes                                                                                  | 10.1161/CIRCOUTCOMES.117.004297                                                                                     | No NLP focus/details       |

|            |                                                                                                            |                                                                                                 |      |                                                                                                                                                                                |                                                                                                       |                      |
|------------|------------------------------------------------------------------------------------------------------------|-------------------------------------------------------------------------------------------------|------|--------------------------------------------------------------------------------------------------------------------------------------------------------------------------------|-------------------------------------------------------------------------------------------------------|----------------------|
| April 2020 | Semantic computational analysis of anticoagulation use in atrial fibrillation from real world data.        | Bean DM.; Teo J.; Wu H.; Oliveira R.; Patel R.; Bendayan R.; Shah AM.; Dobson RJB.; Scott PA.   | 2019 | PloS one                                                                                                                                                                       | 10.1371/journal.pone.0225625                                                                          | Included             |
| April 2020 | Proton pump inhibitor use is positively associated with incidence of cardiovascular disease                | Bell E.J.; St Sauver J.L.; Folsom A.R.; Larson N.B.; Liu H.; Wang L.; Turner S.; Bielinski S.J. | 2017 | Pharmacoepidemiology and Drug Safety                                                                                                                                           | <a href="http://dx.doi.org/10.1002/pds.4275">http://dx.doi.org/10.1002/pds.4275</a>                   | Abstract only        |
| April 2020 | Proton pump inhibitor use is positively associated with incidence of cardiovascular disease                | Bell E.J.; St Sauver J.L.; Roger V.L.; Larson N.B.; Liu H.; Wang L.; Turner S.; Bielinski S.J.  | 2017 | Circulation                                                                                                                                                                    |                                                                                                       | Abstract only        |
| April 2020 | A robust automated left ventricle region of interest localization technique using a cardiac cine MRI atlas | Ben-Zikri, Y.K.; Linte, C.A.                                                                    | 2016 | Progress in Biomedical Optics and Imaging - Proceedings of SPIE                                                                                                                | 10.1117/12.2217885                                                                                    | No NLP focus/details |
| April 2020 | atmoSphere: mindfulness over haptic-audio cross modal correspondence                                       | Benjamin Tag; Takuya Goto; Kouta Minamizawa; Ryan Mannschreck; Haruna Fushimi; Kai Kunze        | 2017 | Proceedings of the 2017 ACM International Joint Conference on Pervasive and Ubiquitous Computing and Proceedings of the 2017 ACM International Symposium on Wearable Computers | 10.1145/3123024.3123190                                                                               | No NLP focus/details |
| April 2020 | Artificial intelligence for diabetes case management: The intersection of physical and mental health       | Bennett C.C.                                                                                    | 2019 | Informatics in Medicine Unlocked                                                                                                                                               | <a href="http://dx.doi.org/10.1016/j.imu.2019.100191">http://dx.doi.org/10.1016/j.imu.2019.100191</a> | Non-cardiology focus |
| April 2020 | Artificial Intelligence for Diabetes Case Management: The Intersection of Physical and Mental Health       | Bennett, Casey C.                                                                               | 2018 | arXiv pre-print                                                                                                                                                                |                                                                                                       | Duplicate            |

|            |                                                                                                                                                                                           |                                                                                                                                                                                                                                                                                                                                           |      |                                                                                            |                                                                                                              |                      |
|------------|-------------------------------------------------------------------------------------------------------------------------------------------------------------------------------------------|-------------------------------------------------------------------------------------------------------------------------------------------------------------------------------------------------------------------------------------------------------------------------------------------------------------------------------------------|------|--------------------------------------------------------------------------------------------|--------------------------------------------------------------------------------------------------------------|----------------------|
| April 2020 | EP1.18-12 The Neutrophil and Platelet to Lymphocyte Ratios and Glasgow Prognostic Score as a Predictor for Relapse After Stereotactic Radiation for Lung Cancer                           | Berg J.; Lindberg M.; Bengtson M.; Brustugun O.T.; Helland A.                                                                                                                                                                                                                                                                             | 2019 | Journal of Thoracic Oncology                                                               | <a href="http://dx.doi.org/10.1016/j.jtho.2019.08.245">http://dx.doi.org/10.1016/j.jtho.2019.08.245</a><br>7 | Non-cardiology focus |
| April 2020 | Opportunities, Threats and Future Directions in Big Data for Medical Wearables                                                                                                            | Berna Seref; Erkan Bostanci                                                                                                                                                                                                                                                                                                               | 2016 | Proceedings of the International Conference on Big Data and Advanced Wireless Technologies | 10.1145/3010089.3010100                                                                                      | No NLP focus/details |
| April 2020 | A Robust e-Epidemiology Tool in Phenotyping Heart Failure with Differentiation for Preserved and Reduced Ejection Fraction: the Electronic Medical Records and Genomics (eMERGE) Network. | Bielinski SJ.; Pathak J.; Carrell DS.; Takahashi PY.; Olson JE.; Larson NB.; Liu H.; Sohn S.; Wells QS.; Denny JC.; Rasmussen-Torvik LJ.; Pacheco JA.; Jackson KL.; Lesnick TG.; Gullerud RE.; Decker PA.; Pereira NL.; Ryu E.; Dart RA.; Peissig P.; Linneman JG.; Jarvik GP.; Larson EB.; Bock JA.; Tromp GC.; de Andrade M.; Roger VL. | 2015 | Journal of cardiovascular translational research                                           | 10.1007/s12265-015-9644-2                                                                                    | Included             |
| April 2020 | NON-LINEAR IS NOT SUPERIOR TO LINEAR AEROBIC PERIODIZATION IN CORONARY PATIENTS                                                                                                           | Boidin M.; Trachsel L.; Nigam A.; Juneau M.; Tremblay J.; M Gayda                                                                                                                                                                                                                                                                         | 2019 | Canadian Journal of Cardiology                                                             | <a href="http://dx.doi.org/10.1016/j.cjca.2019.07.194">http://dx.doi.org/10.1016/j.cjca.2019.07.194</a>      | No NLP focus/details |
| April 2020 | Non-linear is not superior to linear aerobic training periodization in coronary heart disease patients.                                                                                   | Boidin M.; Trachsel LD.; Nigam A.; Juneau M.; Tremblay J.; Gayda M.                                                                                                                                                                                                                                                                       | 2019 | European journal of preventive cardiology                                                  | 10.1177/2047487319891778                                                                                     | No NLP focus/details |
| April 2020 | A connecting system for cardiological lexicons.                                                                                                                                           | Bonacina S.; Marceglia S.; Pinello V.; Magni S.; Pincioli F.                                                                                                                                                                                                                                                                              | 2015 | Studies in health technology and informatics                                               |                                                                                                              | Non-cardiology focus |



|            |                                                                                                                                                                                                          |                                                                                                                                         |      |                                                                                          |                                                                                                     |                      |
|------------|----------------------------------------------------------------------------------------------------------------------------------------------------------------------------------------------------------|-----------------------------------------------------------------------------------------------------------------------------------------|------|------------------------------------------------------------------------------------------|-----------------------------------------------------------------------------------------------------|----------------------|
| April 2020 | Improving Refill Adherence in Medicare Patients With Tailored and Interactive Mobile Text Messaging: Pilot Study.                                                                                        | Brar Prayaga R.; Jeong EW.; Feger E.; Noble HK.; Kmiec M.; Prayaga RS.                                                                  | 2018 | JMIR mHealth and uHealth                                                                 | 10.2196/mhealth.8930                                                                                | No NLP focus/details |
| April 2020 | Canadian Cardiovascular Society (CCS) angina classification extracted from clinical notes by natural language processing: Validation and association with healthcare utilization in an integrated health | Bress A.; Dodson J.D.; Sauer B.S.; Patterson O.P.; Alba P.A.; Duvall S.D.; Crook J.C.; Reese T.R.; Nelson R.N.; Lafleur J.L.            | 2016 | European Heart Journal                                                                   | <a href="http://dx.doi.org/10.1093/eurheartj/ehw433">http://dx.doi.org/10.1093/eurheartj/ehw433</a> | Abstract only        |
| April 2020 | The Emergence and Collapse of Knowledge Boundaries                                                                                                                                                       | Broniatowski, D.A.; Magee, C.L.                                                                                                         | 2017 | IEEE Transactions on Engineering Management                                              | 10.1109/TEM.2017.2677744                                                                            | No NLP focus/details |
| April 2020 | Big Data in Drug Discovery.                                                                                                                                                                              | Brown N.; Cambuzzi J.; Cox PJ.; Davies M.; Dunbar J.; Plumbley D.; Sellwood MA.; Sim A.; Williams-Jones Bl.; Zwierzyna M.; Sheppard DW. |      | Progress in medicinal chemistry                                                          | 10.1016/bs.pmch.2017.12.003                                                                         | Non-cardiology focus |
| April 2020 | Intelligent Control based on Fuzzy logic embedded in FPGA applied in Ventricular Assist Devices (VADs)                                                                                                   | Bruno Santos; Tarcisio LeVeo; Eduardo Bock                                                                                              | 2019 | Proceedings of the 2019 4th International Conference on Robotics, Control and Automation | 10.1145/3351180.3351198                                                                             | Non-English          |
| April 2020 | Coronary Artery Motion Tracking Using Landmark Guided Point Set Registration                                                                                                                             | Bu Xu; Lisheng Xu; Ying Kang; Along Song; Bin Wang; Lu Wang; Benqiang Yang                                                              | 2019 | Proceedings of the Third International Symposium on Image Computing and Digital Medicine | 10.1145/3364836.3364875                                                                             | No NLP focus/details |

|            |                                                                                                      |                                                                                                |      |                                                                                                  |                             |                      |
|------------|------------------------------------------------------------------------------------------------------|------------------------------------------------------------------------------------------------|------|--------------------------------------------------------------------------------------------------|-----------------------------|----------------------|
| April 2020 | Automatic prediction of coronary artery disease from clinical narratives.                            | Buchan K.; Filannino M.; Uzuner vñ.                                                            | 2017 | Journal of biomedical informatics                                                                | 10.1016/j.jbi.2017.06.019   | Non-cardiology focus |
| April 2020 | Automatically finding relevant citations for clinical guideline development.                         | Bui DD.; Jonnalagadda S.; Del Fiol G.                                                          | 2015 | Journal of biomedical informatics                                                                | 10.1016/j.jbi.2015.09.003   | Non-cardiology focus |
| April 2020 | Tiling-Based Programming Model for Structured Grids on GPU Clusters                                  | Burak Bastem; Didem Unat                                                                       | 2020 | Proceedings of the International Conference on High Performance Computing in Asia-Pacific Region | 10.1145/3368474.3368485     | No NLP focus/details |
| April 2020 | EXTRaction of EMR numerical data: an efficient and generalizable tool to EXTEND clinical research.   | Cai T.; Zhang L.; Yang N.; Kumamaru KK.; Rybicki FJ.; Cai T.; Liao KP.                         | 2019 | BMC medical informatics and decision making                                                      | 10.1186/s12911-019-0970-1   | Non-cardiology focus |
| April 2020 | Antemortem Prediction of Braak Stage.                                                                | Carlson JO.; Gatz M.; Pedersen NL.; Graff C.; Nennesmo I.; Lindstrøm AK.; Gerritsen L.         | 2015 | Journal of neuropathology and experimental neurology                                             | 10.1097/NEN.000000000000251 | Non-cardiology focus |
| April 2020 | Pragmatic considerations for fostering reproducible research in artificial intelligence.             | Carter RE.; Attia ZI.; Lopez-Jimenez F.; Friedman PA.                                          | 2019 | NPJ digital medicine                                                                             | 10.1038/s41746-019-0120-2   | Non-cardiology focus |
| April 2020 | A weighty issue: Gender disparities in bariatric surgery counseling                                  | Chang L.-S.; Malmasi S.; Hosomura N.; Zhang H.; Lei V.; Rubin A.; Ting C.; Tong K.; Turchin A. | 2017 | Surgery for Obesity and Related Diseases                                                         |                             | Non-cardiology focus |
| April 2020 | A context-aware approach for progression tracking of medical concepts in electronic medical records. | Chang NW.; Dai HJ.; Jonnagaddala J.; Chen CW.; Tsai RT.; Hsu WL.                               | 2015 | Journal of biomedical informatics                                                                | 10.1016/j.jbi.2015.09.013   | Duplicate            |
| April 2020 | A context-aware approach for progression tracking of medical concepts in electronic medical records  | Chang, N.-W.; Dai, H.-J.; Jonnagaddala, J.; Chen, C.-W.; Tsai, R.T.H.; Hsu, W.-L.              | 2015 | Journal of Biomedical Informatics                                                                | 10.1016/j.jbi.2015.09.013   | Non-cardiology focus |

|            |                                                                                                                                                      |                                                                                                                                                              |      |                                                                                              |                                                                                                               |                      |
|------------|------------------------------------------------------------------------------------------------------------------------------------------------------|--------------------------------------------------------------------------------------------------------------------------------------------------------------|------|----------------------------------------------------------------------------------------------|---------------------------------------------------------------------------------------------------------------|----------------------|
| April 2020 | Tactile sensor for cardiovascular catheters                                                                                                          | Chao-Hsien Huang;<br>Cheng-Hung Shih; Nai-Jun An                                                                                                             | 2016 | Proceedings of the 3rd International Conference on Biomedical and Bioinformatics Engineering | 10.1145/3022702.3022710                                                                                       | No NLP focus/details |
| April 2020 | Innovative Informatics Approaches for Peripheral Artery Disease: Current State and Provider Survey of Strategies for Improving Guideline-Based Care. | Chaudhry AP.; Afzal N.; Abidian MM.; Mallipeddi VP.; Elayavilli RK.; Scott CG.; Kullo IJ.; Wennberg PW.; Pankratz JJ.; Liu H.; Chaudhry R.; Arruda-Olson AM. | 2018 | Mayo Clinic proceedings. Innovations, quality & outcomes                                     | 10.1016/j.mayocpiqo.2018.02.001                                                                               | Non-cardiology focus |
| April 2020 | An automatic system to identify heart disease risk factors in clinical texts over time.                                                              | Chen Q.; Li H.; Tang B.; Wang X.; Liu X.; Liu Z.; Liu S.; Wang W.; Deng Q.; Zhu S.; Chen Y.; Wang J.                                                         | 2015 | Journal of biomedical informatics                                                            | 10.1016/j.jbi.2015.09.002                                                                                     | Duplicate            |
| April 2020 | An automatic system to identify heart disease risk factors in clinical texts over time                                                               | Chen Q.; Li H.; Tang B.; Wang X.; Liu X.; Liu Z.; Liu S.; Wang W.; Deng Q.; Zhu S.; Chen Y.; Wang J.                                                         | 2015 | Journal of Biomedical Informatics                                                            | <a href="http://dx.doi.org/10.1016/j.jbi.2015.09.002">http://dx.doi.org/10.1016/j.jbi.2015.09.002</a>         | Non-cardiology focus |
| April 2020 | Mortality in patients with chronic pancreatitis in a diverse integrated healthcare setting                                                           | Chen Q.; Wu B.U.                                                                                                                                             | 2019 | Pancreas                                                                                     | <a href="http://dx.doi.org/10.1097/MPA.00000000000001419">http://dx.doi.org/10.1097/MPA.00000000000001419</a> | Non-cardiology focus |
| April 2020 | Breeze: Smartphone-based Acoustic Real-time Detection of Breathing Phases for a Gamified Biofeedback Breathing Training                              | Chen-Hsuan Shih; Naofumi Tomita; Yanick X. Lukic; vÁlvaro HernV°ndez Reguera; Elgar Fleisch; Tobias Kowatsch                                                 | 2019 | Proc. ACM Interact. Mob. Wearable Ubiquitous Technol.                                        | 10.1145/3369835                                                                                               | Non-cardiology focus |

|            |                                                                                                                              |                                                                                 |      |                                                                                                         |                                                                                                       |                      |
|------------|------------------------------------------------------------------------------------------------------------------------------|---------------------------------------------------------------------------------|------|---------------------------------------------------------------------------------------------------------|-------------------------------------------------------------------------------------------------------|----------------------|
| April 2020 | Digitally assisted analog front-end power management strategy via dynamic reconfigurability for robust heart rate monitoring | Chengzhi Zong; Somok Mondal; Drew A. Hall; Roozbeh Jafari                       | 2015 | SIGBED Rev.                                                                                             | 10.1145/2815482.2815489                                                                               | No NLP focus/details |
| April 2020 | Machine Learning-Based Prediction of Korean Triage and Acuity Scale Level in Emergency Department Patients.                  | Choi SW.; Ko T.; Hong KJ.; Kim KH.                                              | 2019 | Healthcare informatics research                                                                         | 10.4258/hir.2019.25.4.305                                                                             | Non-cardiology focus |
| April 2020 | Cause-specific premature death from ambient PM2.5 exposure in India: Estimate adjusted for baseline mortality.               | Chowdhury S.; Dey S.                                                            | 2016 | Environment international                                                                               | 10.1016/j.envint.2016.03.004                                                                          | No NLP focus/details |
| April 2020 | Cause-specific premature death from ambient PM <sub>2.5</sub> exposure in India: Estimate adjusted for baseline mortality    | Chowdhury, S.; Dey, S.                                                          | 2016 | Environment International                                                                               | 10.1016/j.envint.2016.03.004                                                                          | Duplicate            |
| April 2020 | A Comprehensive Approach to Decision Aids Supporting Shared Decision Making in Cardiac Rehabilitation                        | Cindel Bonneux; Gustavo Rovelo; Paul Dendale; Karin Coninx                      | 2019 | Proceedings of the 13th EAI International Conference on Pervasive Computing Technologies for Healthcare | 10.1145/3329189.3329241                                                                               | Non-cardiology focus |
| April 2020 | Transitioning self-regulated learning profiles in hypermedia-learning environments                                           | Clarissa Lau; Jeanne Sinclair; Michelle Taub; Roger Azevedo; Eunice Eunhee Jang | 2017 | Proceedings of the Seventh International Learning Analytics & Knowledge Conference                      | 10.1145/3027385.3027443                                                                               | Non-cardiology focus |
| April 2020 | PULSANTE: Integrating Anatomy Lessons into the Artistic Process                                                              | Claudia Nájuez-Pacheco; Jorge Olivares-Retamal                                  | 2020 | Proceedings of the Fourteenth International Conference on Tangible, Embedded, and Embodied Interaction  | 10.1145/3374920.3375295                                                                               | Non-cardiology focus |
| April 2020 | Agile text mining for the 2014 i2b2/UTHealth Cardiac risk factors challenge                                                  | Cormack J.; Nath C.; Milward D.; Raja K.; Jonnalagadda S.R.                     | 2015 | Journal of Biomedical Informatics                                                                       | <a href="http://dx.doi.org/10.1016/j.jbi.2015.06.030">http://dx.doi.org/10.1016/j.jbi.2015.06.030</a> | Non-cardiology focus |

|            |                                                                                                                                         |                                                                                                                                                   |      |                                                                             |                                                                                                                 |                      |
|------------|-----------------------------------------------------------------------------------------------------------------------------------------|---------------------------------------------------------------------------------------------------------------------------------------------------|------|-----------------------------------------------------------------------------|-----------------------------------------------------------------------------------------------------------------|----------------------|
| April 2020 | Agile text mining for the 2014 i2b2/UTHealth Cardiac risk factors challenge.                                                            | Cormack J.; Nath C.; Milward D.; Raja K.; Jonnalagadda SR.                                                                                        | 2015 | Journal of biomedical informatics                                           | 10.1016/j.jbi.2015.06.030                                                                                       | Duplicate            |
| April 2020 | Electronic health records (EHRs) data validation in atherosclerotic/cardiovascular clinical phenotypes                                  | Cruz N.; Serrano M.; Lopez A.; Medrano I.H.; Lozano J.; Coll B.                                                                                   | 2019 | European Heart Journal                                                      | <a href="http://dx.doi.org/10.1093/eurheartj/ehz747">http://dx.doi.org/10.1093/eurheartj/ehz747</a> .0191       | Abstract only        |
| April 2020 | Research on Risk Prediction of Dyslipidemia in Steel Workers Based on Recurrent Neural Network and LSTM Neural Network                  | Cui, S.; Li, C.; Chen, Z.; Wang, J.; Yuan, J.                                                                                                     | 2020 | IEEE Access                                                                 | 10.1109/ACCESS.2020.2974887                                                                                     | No NLP focus/details |
| April 2020 | UTILIZATION OF GUIDELINE-DIRECTED DEVICE THERAPIES IN HEART FAILURE PATIENTS: A REAL-WORLD ANALYSIS USING ELECTRONIC HEALTH RECORD DATA | Curtis A.B.; Manrodt C.M.; Fonarow G.C.                                                                                                           | 2019 | Heart Rhythm                                                                | <a href="http://dx.doi.org/10.1016/j.hrthm.2019.04.013">http://dx.doi.org/10.1016/j.hrthm.2019.04.013</a>       | Abstract only        |
| April 2020 | A Replication Study on Code Comprehension and Expertise using Lightweight Biometric Sensors                                             | D. Fucci; D. Girardi; N. Novielli; L. Quaranta; F. Lanubile                                                                                       | 2019 | 2019 IEEE/ACM 27th International Conference on Program Comprehension (ICPC) | 10.1109/ICPC.2019.00050                                                                                         | Non-cardiology focus |
| April 2020 | Ethnicity and cardiovascular health inequalities in people with severe mental illnesses: protocol for the E-CHASM study.                | Das-Munshi J.; Ashworth M.; Gaughran F.; Hull S.; Morgan C.; Nazroo J.; Roberts A.; Rose D.; Schofield P.; Stewart R.; Thornicroft G.; Prince MJ. | 2016 | Social psychiatry and psychiatric epidemiology                              | 10.1007/s00127-016-1185-8                                                                                       | No NLP focus/details |
| April 2020 | What's in a dotphrase? Evaluation of a note-based ascvd risk calculation tool                                                           | Dashiell-Earp C.; Drake L.; Osman S.; Branda M.; Chrastil H.; Altman R.; Lewis C.                                                                 | 2019 | Circulation                                                                 | <a href="http://dx.doi.org/10.1161/circ.140.suppl_1.13902">http://dx.doi.org/10.1161/circ.140.suppl_1.13902</a> | Abstract only        |
| April 2020 | Very poor visual acuity in non-arteritic anterior ischemic optic neuropathy (NAION)                                                     | Dattilo M.; Tian T.; Bruce B.B.; Narayana K.; Peragallo J.; Newman N.J.; Biousse V.                                                               | 2017 | Investigative Ophthalmology and Visual Science                              |                                                                                                                 | Non-cardiology focus |

|            |                                                                                                                                                         |                                                                                                                                                        |      |                                                                                                                  |                                                                                                       |                      |
|------------|---------------------------------------------------------------------------------------------------------------------------------------------------------|--------------------------------------------------------------------------------------------------------------------------------------------------------|------|------------------------------------------------------------------------------------------------------------------|-------------------------------------------------------------------------------------------------------|----------------------|
| April 2020 | CPS-heart: cyber-physical systems for cardiovascular diseases                                                                                           | Dhwaj Verma                                                                                                                                            | 2018 | Proceedings of the Workshop Program of the 19th International Conference on Distributed Computing and Networking | 10.1145/3170521.3170548                                                                               | No NLP focus/details |
| April 2020 | Artificial intelligence in clinical and genomic diagnostics                                                                                             | Dias R.; Torkamani A.                                                                                                                                  | 2019 | Genome Medicine                                                                                                  | <a href="http://dx.doi.org/10.1186/s13073-019-0689-8">http://dx.doi.org/10.1186/s13073-019-0689-8</a> | Non-cardiology focus |
| April 2020 | Building a Natural Language Processing Tool to Identify Patients With High Clinical Suspicion for Kawasaki Disease from Emergency Department Notes.     | Doan S.; Maehara CK.; Chaparro JD.; Lu S.; Liu R.; Graham A.; Berry E.; Hsu CN.; Kanegaye JT.; Lloyd DD.; Ohno-Machado L.; Burns JC.; Tremoulet AH.; . | 2016 | Academic emergency medicine : official journal of the Society for Academic Emergency Medicine                    | 10.1111/acem.12925                                                                                    | Similar study        |
| April 2020 | How Do You #relax When You're #stressed? A Content Analysis and Infodemiology Study of Stress-Related Tweets.                                           | Doan S.; Ritchart A.; Perry N.; Chaparro JD.; Conway M.                                                                                                | 2017 | JMIR public health and surveillance                                                                              | 10.2196/publichealth.5939                                                                             | Non-cardiology focus |
| April 2020 | Development of a cardiac-centered frailty ontology.                                                                                                     | Doing-Harris K.; Bray BE.; Thackeray A.; Shah RU.; Shao Y.; Cheng Y.; Zeng-Treitler Q.; Garvin JH.; Weir C.                                            | 2019 | Journal of biomedical semantics                                                                                  | 10.1186/s13326-019-0195-3                                                                             | Non-cardiology focus |
| April 2020 | Evaluation of Appropriate Venous Thromboembolism Prophylaxis in Patients With Orthopaedic Trauma With Symptom-Driven Vascular and Radiographic Studies. | Domes CM.; Schleyer AM.; McQueen JM.; Pergamit RF.; Beingsner DM.                                                                                      | 2017 | Journal of orthopaedic trauma                                                                                    | 10.1097/BOT.0000000000000991                                                                          | Non-cardiology focus |

|            |                                                                                                                                        |                                                                                                                                    |      |                                                                                             |                           |                      |
|------------|----------------------------------------------------------------------------------------------------------------------------------------|------------------------------------------------------------------------------------------------------------------------------------|------|---------------------------------------------------------------------------------------------|---------------------------|----------------------|
| April 2020 | Development and future deployment of a 5 years allograft survival model for kidney transplantation.                                    | DuBay DA.; Su Z.; Morinelli TA.; Baliga P.; Rohan V.; Bian J.; Northrup D.; Pilch N.; Rao V.; Srinivas TR.; Mauldin PD.; Taber DJ. | 2019 | Nephrology (Carlton, Vic.)                                                                  | 10.1111/nep.13488         | Non-cardiology focus |
| April 2020 | Natural language processing to improve identification of peripheral arterial disease in electronic health data                         | Duke J.; Chase M.; Poznanski-Ring N.; Martin J.; Fuhr R.; Chatterjee A.; Hirsch A.                                                 | 2016 | Journal of the American College of Cardiology                                               |                           | Abstract only        |
| April 2020 | Effect of Evidence-based Clinical Decision Support on the Use and Yield of CT Pulmonary Angiographic Imaging in Hospitalized Patients. | Dunne RM.; Ip IK.; Abbett S.; Gershanik EF.; Raja AS.; Hunsaker A.; Khorasani R.                                                   | 2015 | Radiology                                                                                   | 10.1148/radiol.15141208   | Similar study        |
| April 2020 | Portable computer vision-based cardiac estimation as a teaching aid                                                                    | Dustin Terence van der Haar                                                                                                        | 2017 | Proceedings of the 3rd International Conference on Communication and Information Processing | 10.1145/3162957.3163006   | No NLP focus/details |
| April 2020 | Multiple MACE Risk Prediction using Multi-Task Recurrent Neural Network with Attention                                                 | E. Xu; S. Zhao; J. Mei; E. Xia; Y. Yu; S. Huang                                                                                    | 2019 | 2019 IEEE International Conference on Healthcare Informatics (ICHI)                         | 10.1109/ICHI.2019.8904675 | No NLP focus/details |
| April 2020 | A randomized automated thresholding method to identify comet objects on comet assay images                                             | Eftal Sehirlı; M. Kamil Turan; Emrullah Demiral                                                                                    | 2017 | Proceedings of the 3rd International Conference on Communication and Information Processing | 10.1145/3162957.3163044   | No NLP focus/details |

|            |                                                                                                                              |                                                                                                                                              |      |                                                                                                                 |                                                                                                         |                      |
|------------|------------------------------------------------------------------------------------------------------------------------------|----------------------------------------------------------------------------------------------------------------------------------------------|------|-----------------------------------------------------------------------------------------------------------------|---------------------------------------------------------------------------------------------------------|----------------------|
| April 2020 | Pilot evaluation of a persuasive mobile application to change individuals, " behavior during recurrent myocardial infarction | Erik Prytz; Patrik Johansson; Sofia Sederholm Lawesson; Maria Ericsson; Ingela Thylv@n                                                       | 2019 | Proceedings of the 31st European Conference on Cognitive Ergonomics                                             | 10.1145/3335082.3335102                                                                                 | No NLP focus/details |
| April 2020 | A rule-based electronic phenotyping algorithm for detecting clinically relevant cardiovascular disease cases.                | Esteban S.; Rodr#iguez Tablado M.; Ricci RI.; Terrasa S.; Kopitowski K.                                                                      | 2017 | BMC research notes                                                                                              | 10.1186/s13104-017-2600-2                                                                               | Included             |
| April 2020 | Impact of a mobile cycling application on cardiac patients, " cycling behavior and enjoyment                                 | Eva Geurts; Dominique Hansen; Paul Dendale; Karin Coninx                                                                                     | 2018 | Proceedings of the 11th PErvasive Technologies Related to Assistive Environments Conference                     | 10.1145/3197768.3197783                                                                                 | No NLP focus/details |
| April 2020 | Automated identification and predictive tools to help identify high-risk heart failure patients: pilot evaluation.           | Evans RS.; Benuzillo J.; Horne BD.; Lloyd JF.; Bradshaw A.; Budge D.; Rasmusson KD.; Roberts C.; Buckway J.; Geer N.; Garrett T.; Lappv© DL. | 2016 | Journal of the American Medical Informatics Association : JAMIA                                                 | 10.1093/jamia/ocv197                                                                                    | Included             |
| April 2020 | Non-invasive sleep-environment monitoring system                                                                             | Fabio Lobato; Bruno Silva; Rodrigo de Bem; Diane Miranda                                                                                     | 2015 | Proceedings of the 8th ACM International Conference on PErvasive Technologies Related to Assistive Environments | 10.1145/2769493.2769563                                                                                 | Non-cardiology focus |
| April 2020 | New Approaches to Conducting Randomized Controlled Trials                                                                    | Fanaroff A.C.; Califf R.M.; Lopes R.D.                                                                                                       | 2020 | Journal of the American College of Cardiology                                                                   | <a href="http://dx.doi.org/10.1016/j.jacc.2019.11.043">http://dx.doi.org/10.1016/j.jacc.2019.11.043</a> | No NLP focus/details |



|            |                                                                                                                                                                                                                                                     |                                                                                                                  |      |                                              |                                                                                                           |                            |
|------------|-----------------------------------------------------------------------------------------------------------------------------------------------------------------------------------------------------------------------------------------------------|------------------------------------------------------------------------------------------------------------------|------|----------------------------------------------|-----------------------------------------------------------------------------------------------------------|----------------------------|
| April 2020 | IMPROVING KNOWLEDGE AND PRACTICE THROUGH MASSIVE OPEN ONLINE DEMENTIA EDUCATION: THE UNDERSTANDING DEMENTIA AND PREVENTING DEMENTIA MOOCS                                                                                                           | Farrow M.; Doherty K.; McInerney F.; Klekociuk S.Z.; Bindoff A.; Vickers J.C.                                    | 2018 | Alzheimer's and Dementia                     | <a href="http://dx.doi.org/10.1016/j.jalz.2018.06.2368">http://dx.doi.org/10.1016/j.jalz.2018.06.2368</a> | Non-cardiology focus       |
| April 2020 | Predicting Intensive Care Unit admission among patients presenting to the emergency department using machine learning and natural language processing.                                                                                              | Fernandes M.; Mendes R.; Vieira SM.; Leite F.; Palos C.; Johnson A.; Finkelstein S.; Horng S.; Celi LA.          | 2020 | PloS one                                     | 10.1371/journal.pone.0229331                                                                              | Non-cardiology focus       |
| April 2020 | Estimating a Bias in ICD Encodings for Billing Purposes.                                                                                                                                                                                            | Fette G.; Krug M.; Kaspar M.; Liman L.; Dietrich G.; Ertl M.; Krebs J.; Stvörk S.; Puppe F.                      | 2018 | Studies in health technology and informatics |                                                                                                           | Non-cardiology focus       |
| April 2020 | Using natural language processing to extract structured epilepsy data from unstructured clinic letters: development and validation of the ExECT (extraction of epilepsy clinical text) system.                                                      | Fonferko-Shadrach B.; Lacey AS.; Roberts A.; Akbari A.; Thompson S.; Ford DV.; Lyons RA.; Rees MI.; Pickrell WO. | 2019 | BMJ open                                     | 10.1136/bmjopen-2018-023232                                                                               | Non-cardiology focus       |
| April 2020 | Heart Failure Dashboard Design and Validation to Improve Care of Veterans.                                                                                                                                                                          | Foster M.; Albanese C.; Chen Q.; Sethares KA.; Evans S.; Lehmann LS.; Spencer J.; Joseph J.                      | 2020 | Applied clinical informatics                 | 10.1055/s-0040-1701257                                                                                    | No NLP focus/details       |
| April 2020 | Hot topics and trends in cardiovascular research.                                                                                                                                                                                                   | Gal D.; Thijs B.; Glvšnzal W.; Sipido KR.                                                                        | 2019 | European heart journal                       | 10.1093/eurheartj/ehz282                                                                                  | Review/perspective article |
| April 2020 | Hot topics and networks in Cardiovascular Research                                                                                                                                                                                                  | Gal D.; Vandeveld W.; Sipido K.R.                                                                                | 2015 | Cardiovascular Research                      | <a href="http://dx.doi.org/10.1093/cvr/cvv245">http://dx.doi.org/10.1093/cvr/cvv245</a>                   | Duplicate                  |
| April 2020 | Clinical Practice Guidelines Consistency for Patients with Multimorbidity: A Case-Study in the Management of Type 2 Diabetes and Hypertension                                                                                                       | Galopin, A.; Bouaud, J.; Pereira, S.; Sv©roussi, B.                                                              | 2015 | Studies in Health Technology and Informatics | 10.3233/978-1-61499-512-8-344                                                                             | Non-cardiology focus       |
| April 2020 | Comparison of adverse event and device problem rates for transcatheter aortic valve replacement and Mitraclip procedures as reported by the Transcatheter Valve Therapy Registry and the Food and Drug Administration postmarket surveillance data. | Galper BZ.; Beery DE.; Leighton G.; Englander LL.                                                                | 2018 | American heart journal                       | 10.1016/j.ahj.2017.10.013                                                                                 | Included                   |

|            |                                                                                                                                             |                                                                                                                                                                     |      |                                                                                               |                             |                      |
|------------|---------------------------------------------------------------------------------------------------------------------------------------------|---------------------------------------------------------------------------------------------------------------------------------------------------------------------|------|-----------------------------------------------------------------------------------------------|-----------------------------|----------------------|
| April 2020 | Mimvec: a deep learning approach for analyzing the human phenome.                                                                           | Gan M.; Li W.; Zeng W.; Wang X.; Jiang R.                                                                                                                           | 2017 | BMC systems biology                                                                           | 10.1186/s12918-017-0451-z   | Non-cardiology focus |
| April 2020 | Automating Quality Measures for Heart Failure Using Natural Language Processing: A Descriptive Study in the Department of Veterans Affairs. | Garvin JH.; Kim Y.; Gobbel GT.; Matheny ME.; Redd A.; Bray BE.; Heidenreich P.; Bolton D.; Heavirland J.; Kelly N.; Reeves R.; Kalsy M.; Goldstein MK.; Meystre SM. | 2018 | JMIR medical informatics                                                                      | 10.2196/medinform.9150      | Included             |
| April 2020 | Advantages of hybrid deep learning frameworks in applications with limited data                                                             | Gavrishchaka, V.V.; Yang, Z.; (Rebecca) Miao, X.; Senyukova, O.                                                                                                     | 2018 | International Journal of Machine Learning and Computing                                       | 10.18178/ijmlc.2018.8.6.744 | No NLP focus/details |
| April 2020 | Toward improving surgical outcomes by incorporating cognitive load measurement into process-driven guidance                                 | George S. Avrunin; Lori A. Clarke; Heather M. Conboy; Leon J. Osterweil; Roger D. Dias; Steven J. Yule; Julian M. Goldman; Marco A. Zenati                          | 2018 | Proceedings of the International Workshop on Software Engineering in Healthcare Systems       | 10.1145/3194696.3194705     | No NLP focus/details |
| April 2020 | Two-Dimensional Simulation of Blood Flow in Thoracic Aorta                                                                                  | Gerardo Ojeda; Danilo Galindo; Alberto Cadena; Winston S. Percybrooks; Juan C. Velez; Pablo Tello P. Juan                                                           | 2019 | Proceedings of the 2019 9th International Conference on Biomedical Engineering and Technology | 10.1145/3326172.3326206     | No NLP focus/details |
| April 2020 | Adverse drug event rates in pediatric pulmonary hypertension: a comparison of real-world data sources.                                      | Geva A.; Abman SH.; Manzi SF.; Ivy DD.; Mullen MP.; Griffin J.; Lin C.; Savova GK.; Mandl KD.                                                                       | 2020 | Journal of the American Medical Informatics Association : JAMIA                               | 10.1093/jamia/ocz194        | Non-cardiology focus |

|            |                                                                                                                                                       |                                                                                            |      |                                                                   |                                                                                                         |                      |
|------------|-------------------------------------------------------------------------------------------------------------------------------------------------------|--------------------------------------------------------------------------------------------|------|-------------------------------------------------------------------|---------------------------------------------------------------------------------------------------------|----------------------|
| April 2020 | Characterisation of mental health conditions in social media using Informed Deep Learning.                                                            | Gkotsis G.; Oellrich A.; Velupillai S.; Liakata M.; Hubbard T.J.; Dobson R.J.; Dutta R.    | 2017 | Scientific reports                                                | 10.1038/srep45141                                                                                       | Non-cardiology focus |
| April 2020 | Extracting pest risk information from risk assessment documents                                                                                       | Glen, N.; Korol, O.; Andrv©, L.; Robert, F.; Tom, G.                                       | 2019 | Proceedings of the ACM/IEEE Joint Conference on Digital Libraries | 10.1109/JCDL.2019.00074                                                                                 | Non-cardiology focus |
| April 2020 | GENDER DIFFERENCES IN CLINICAL PROFILE AND HEALTHCARE UTILIZATION OF NON ALCOHOLIC FATTY LIVER PATIENTS                                               | Goldshtein I.; Chodick G.; Shibolet O.                                                     | 2018 | Value in Health                                                   | <a href="http://dx.doi.org/10.1016/j.jval.2018.09.871">http://dx.doi.org/10.1016/j.jval.2018.09.871</a> | Abstract only        |
| April 2020 | Extra hepatic manifestation of non alcoholic fatty liver                                                                                              | Goldshtein I.; Shibolet O.; Chodick G.                                                     | 2018 | Hepatology                                                        | <a href="http://dx.doi.org/10.1002/hep.30257">http://dx.doi.org/10.1002/hep.30257</a>                   | Non-cardiology focus |
| April 2020 | An automated knowledge-based textual summarization system for longitudinal, multivariate clinical data.                                               | Goldstein A.; Shahar Y.                                                                    | 2016 | Journal of biomedical informatics                                 | 10.1016/j.jbi.2016.03.022                                                                               | Non-cardiology focus |
| April 2020 | Combining glass box and black box evaluations in the identification of heart disease risk factors and their temporal relations from clinical records. | Grouin C.; Moriceau V.; Zweigenbaum P.                                                     | 2015 | Journal of biomedical informatics                                 | 10.1016/j.jbi.2015.06.014                                                                               | Non-cardiology focus |
| April 2020 | Combining glass box and black box evaluations in the identification of heart disease risk factors and their temporal relations from clinical records  | Grouin, C.; Moriceau, V.; Zweigenbaum, P.                                                  | 2015 | Journal of Biomedical Informatics                                 | 10.1016/j.jbi.2015.06.014                                                                               | Non-cardiology focus |
| April 2020 | Development of text mining based classification of written communication within a telemedical collaborative network.                                  | Gruber K.; Modre-Osprian R.; Kreiner K.; Kastner P.; Schreier G.                           | 2015 | Studies in health technology and informatics                      |                                                                                                         | Non-cardiology focus |
| April 2020 | Automated Transformation of openEHR Data Instances to OWL.                                                                                            | Haarbrandt B.; Jack T.; Marschollek M.                                                     | 2016 | Studies in health technology and informatics                      |                                                                                                         | Non-cardiology focus |
| April 2020 | An Efficient Pattern Recognition Kernel-Based Method for Atrial Fibrillation Diagnosis                                                                | Haddi, Z.; Ananou, B.; Trardi, Y.; Pons, J.-F.; Delliaux, S.; Ouladsine, M.; Deharo, J.-C. | 2018 | Computing in Cardiology                                           | 10.22489/CinC.2018.090                                                                                  | No NLP focus/details |

|            |                                                                                                                                                                                      |                                                                                                        |      |                                                                                                                                     |                                                                                                       |                      |
|------------|--------------------------------------------------------------------------------------------------------------------------------------------------------------------------------------|--------------------------------------------------------------------------------------------------------|------|-------------------------------------------------------------------------------------------------------------------------------------|-------------------------------------------------------------------------------------------------------|----------------------|
| April 2020 | Electronic medical record phenotyping using the anchor and learn framework.                                                                                                          | Halpern Y.; Horng S.; Choi Y.; Sontag D.                                                               | 2016 | Journal of the American Medical Informatics Association : JAMIA                                                                     | 10.1093/jamia/ocw011                                                                                  | Non-cardiology focus |
| April 2020 | Improving the Efficacy of the Data Entry Process for Clinical Research With a Natural Language Processing-Driven Medical Information Extraction System: Quantitative Field Research. | Han J.; Chen K.; Fang L.; Zhang S.; Wang F.; Ma H.; Zhao L.; Liu S.                                    | 2019 | JMIR medical informatics                                                                                                            | 10.2196/13331                                                                                         | Non-cardiology focus |
| April 2020 | Label-Free Ratiometric Electrochemiluminescence Aptasensor Based on Nanographene Oxide Wrapped Titanium Dioxide Nanoparticles with Potential-Resolved Electrochemiluminescence       | Han, Z.; Shu, J.; Liang, X.; Cui, H.                                                                   | 2019 | Analytical Chemistry                                                                                                                | 10.1021/acs.analchem.9b02318                                                                          | No NLP focus/details |
| April 2020 | Patient identity verification based on physiological signal fusion                                                                                                                   | Hang Cai; Krishna K. Venkatasubramanian                                                                | 2017 | Proceedings of the Second IEEE/ACM International Conference on Connected Health: Applications, Systems and Engineering Technologies |                                                                                                       | No NLP focus/details |
| April 2020 | Conditional Convolution Generative Adversarial Network for Bi-ventricle Segmentation in Cardiac MR Images                                                                            | Haoran Zhang; Xuehao Cao; Lisheng Xu; Lin Qi                                                           | 2019 | Proceedings of the Third International Symposium on Image Computing and Digital Medicine                                            | 10.1145/3364836.3364860                                                                               | No NLP focus/details |
| April 2020 | The impact of age and comorbidities on practice patterns and outcomes in patients with relapsed/refractory multiple myeloma in the era of novel therapies                            | Hari P.; Romanus D.; Luptakova K.; Blazer M.; Yong C.; Raju A.; Farrelly E.; Labotka R.; Morrison V.A. | 2018 | Journal of Geriatric Oncology                                                                                                       | <a href="http://dx.doi.org/10.1016/j.jgo.2017.09.007">http://dx.doi.org/10.1016/j.jgo.2017.09.007</a> | Non-cardiology focus |

|            |                                                                                                                                                                                                                           |                                                                                               |      |                                                                                                                                     |                                                                                                           |                      |
|------------|---------------------------------------------------------------------------------------------------------------------------------------------------------------------------------------------------------------------------|-----------------------------------------------------------------------------------------------|------|-------------------------------------------------------------------------------------------------------------------------------------|-----------------------------------------------------------------------------------------------------------|----------------------|
| April 2020 | Fog Data: Enhancing Telehealth Big Data Through Fog Computing                                                                                                                                                             | Harishchandra Dubey; Jing Yang; Nick Constant; Amir Mohammad Amiri; Qing Yang; Kunal Makodiya | 2015 | Proceedings of the ASE BigData & SocialInformatics 2015                                                                             | 10.1145/2818869.2818889                                                                                   | Non-cardiology focus |
| April 2020 | RESPIRE: a spectral kurtosis-based method to extract respiration rate from wearable PPG signals                                                                                                                           | Harishchandra Dubey; Nicholas Constant; Kunal Mankodiya                                       | 2017 | Proceedings of the Second IEEE/ACM International Conference on Connected Health: Applications, Systems and Engineering Technologies | 10.1109/chase.2017.64                                                                                     | Non-cardiology focus |
| April 2020 | Can Machine Learning Methods Produce Accurate and Easy-to-use Prediction Models of 30-day Complications and Mortality After Knee or Hip Arthroplasty?                                                                     | Harris AHS.; Kuo AC.; Weng Y.; Trickey AW.; Bowe T.; Giori NJ.                                | 2019 | Clinical orthopaedics and related research                                                                                          | 10.1097/CORR.0000000000000601                                                                             | Non-cardiology focus |
| April 2020 | Diagnostic relevance and therapeutic efficiency of a systemic procedure of sleep (respiratory and architecture) disorders care in a 100 consecutive depressive hospitalized patients cohort into a psychiatric department | Hazouard E.; Aspe G.; Ramage I.; Viaud P.; Gibier L.; Thoreau P.; Caparros C.                 | 2019 | Sleep Medicine                                                                                                                      | <a href="http://dx.doi.org/10.1016/j.sleep.2019.11.408">http://dx.doi.org/10.1016/j.sleep.2019.11.408</a> | Non-cardiology focus |
| April 2020 | Classification of ventricular arrhythmias using feature ranking score algorithm                                                                                                                                           | Hemalatha Karnan; N. Sivakumaran; M. Rajajeya kumar                                           | 2017 | Proceedings of the 1st International Conference on Internet of Things and Machine Learning                                          | 10.1145/3109761.3109801                                                                                   | No NLP focus/details |
| April 2020 | Human-in-the-loop learning for personalized diet monitoring from unstructured mobile data                                                                                                                                 | Hezarjaribi, N.; Mazrouee, S.; Hemati, S.; Chaytor, N.S.; Perrigue, M.; Ghasemzadeh, H.       | 2019 | ACM Transactions on Interactive Intelligent Systems                                                                                 | 10.1145/3319370                                                                                           | Non-cardiology focus |

|            |                                                                                                                                            |                                                                                                                                                                                |      |                                                                                                    |                                                                                                           |                      |
|------------|--------------------------------------------------------------------------------------------------------------------------------------------|--------------------------------------------------------------------------------------------------------------------------------------------------------------------------------|------|----------------------------------------------------------------------------------------------------|-----------------------------------------------------------------------------------------------------------|----------------------|
| April 2020 | A New Algorithm for Predicting the Progression from Paroxysmal to Persistent Atrial Fibrillation                                           | Hisham ElMoaqet;<br>Zakaria Almuwaqqat;<br>Mohammed Saeed                                                                                                                      | 2017 | Proceedings of the 9th International Conference on Bioinformatics and Biomedical Technology        | 10.1145/3093293.3093311                                                                                   | No NLP focus/details |
| April 2020 | An automatic early risk classification of hard coronary heart diseases using framingham scoring model                                      | Hoda Ahmed Galal Elsayed; Liyakathunisa Syed                                                                                                                                   | 2017 | Proceedings of the Second International Conference on Internet of things, Data and Cloud Computing | 10.1145/3018896.3036384                                                                                   | No NLP focus/details |
| April 2020 | Computer-guided normal-low versus normal-high potassium control after cardiac surgery: No impact on atrial fibrillation or atrial flutter. | Hoekstra M.; Hessels L.; Rienstra M.; Yeh L.; Lansink AO.; Vogelzang M.; van der Horst IC.; van der Maaten JM.; Mariani MA.; de Smet AM.; Struys MM.; Zijlstra F.; Nijsten MW. | 2016 | American heart journal                                                                             | 10.1016/j.ahj.2015.10.020                                                                                 | No NLP focus/details |
| April 2020 | Atrial fibrillation detection with deep learning: A survey                                                                                 | Honchar O.; Sahan V.; Fridman R.; Bachynskyi A.; Pkhakadze O.                                                                                                                  | 2018 | Europace                                                                                           | <a href="http://dx.doi.org/10.1093/europace/euy202.006">http://dx.doi.org/10.1093/europace/euy202.006</a> | Abstract only        |
| April 2020 | Quantitative Regular Expressions for Arrhythmia Detection                                                                                  | Houssam Abbas; Alena Rodionova; Konstantinos Mamouras; Ezio Bartocci; Scott A. Smolka; Radu Grosu                                                                              | 2019 | IEEE/ACM Trans. Comput. Biol. Bioinformatics                                                       | 10.1109/tcbb.2018.2885274                                                                                 | No NLP focus/details |
| April 2020 | Utilizing Chinese admission records for MACE prediction of acute coronary syndrome                                                         | Hu D.; Huang Z.; Chan T.-M.; Dong W.; Lu X.; Duan H.                                                                                                                           | 2016 | International Journal of Environmental Research and Public Health                                  | <a href="http://dx.doi.org/10.3390/ijerph13090912">http://dx.doi.org/10.3390/ijerph13090912</a>           | Included             |

|            |                                                                                                         |                                                                                                                            |      |                                                                                                                       |                                   |                      |
|------------|---------------------------------------------------------------------------------------------------------|----------------------------------------------------------------------------------------------------------------------------|------|-----------------------------------------------------------------------------------------------------------------------|-----------------------------------|----------------------|
| April 2020 | Can machine learning improve patient selection for cardiac resynchronization therapy?                   | Hu SY.; Santus E.; Forsyth AW.; Malhotra D.; Haimson J.; Chatterjee NA.; Kramer DB.; Barzilay R.; Tulskey JA.; Lindvall C. | 2019 | PLoS one                                                                                                              | 10.1371/journal.pone.0222397      | Included             |
| April 2020 | Cardiovascular risk in patients with alopecia areata (AA): A propensity-matched retrospective analysis. | Huang KP.; Joyce CJ.; Topaz M.; Guo Y.; Mostaghimi A.                                                                      | 2016 | Journal of the American Academy of Dermatology                                                                        | 10.1016/j.jaad.2016.02.1234       | Non-cardiology focus |
| April 2020 | Health Assessment System Based on Big Data Analysis of Meridian Electrical Potential                    | Hui Li; Yibo Cheng; Yinghui Li; Xiaochang Ma; Delong Li                                                                    | 2018 | Proceedings of the 3rd International Conference on Biomedical Signal and Image Processing                             | 10.1145/3278229.3278235           | No NLP focus/details |
| April 2020 | [WiP] Sentiment Analysis Electronic Healthcare System Based on Heart Rate Monitoring Smart Bracelet     | I. Marin; N. Goga; A. Doncescu                                                                                             | 2018 | 2018 IEEE 11th Conference on Service-Oriented Computing and Applications (SOCA)                                       | 10.1109/SOCA.2018.00022           | No NLP focus/details |
| April 2020 | Applying Stochastic Process Model to Imputation of Censored Longitudinal Data                           | Ilya Zhbannikov; Konstantin Arbeev; Anatoliy Yashin                                                                        | 2018 | Proceedings of the 2018 ACM International Conference on Bioinformatics, Computational Biology, and Health Informatics | 10.1145/3233547.3233591           | No NLP focus/details |
| April 2020 | 4q21.2q21.3 Duplication: Molecular and Neuropsychological Aspects.                                      | Iourov IY.; Zelenova MA.; Vorsanova SG.; Voinova VV.; Yurov YB.                                                            | 2018 | Current genomics                                                                                                      | 10.2174/1389202918666170717161426 | Non-cardiology focus |

|            |                                                                                                                                                            |                                                                                                                                                                         |      |                                                                                |                                |                            |
|------------|------------------------------------------------------------------------------------------------------------------------------------------------------------|-------------------------------------------------------------------------------------------------------------------------------------------------------------------------|------|--------------------------------------------------------------------------------|--------------------------------|----------------------------|
| April 2020 | VR System for Neurorehabilitation: Where Technology Meets Medicine for Empowering Patients and Therapists in the Rehabilitation Process                    | Iulia-Cristina StfÉnicfÉ;<br>Florica Moldoveanu;<br>Maria-Iuliana DascfÉlu;<br>Alin Moldoveanu;<br>Giovanni-Paul Portelli;<br>Constanta Nicoleta Bodea                  | 2019 | Proceedings of the 6th Conference on the Engineering of Computer Based Systems | 10.1145/3352700.3352705        | Non-cardiology focus       |
| April 2020 | An adverse drug events ontology population from text using a multi-class SVM based approach                                                                | Jabnoun, O.; Achour, H.; Nouira, K.                                                                                                                                     | 2018 | Lecture Notes in Business Information Processing                               | 10.1007/978-3-319-97749-2_11   | Non-cardiology focus       |
| April 2020 | CogStack - experiences of deploying integrated information retrieval and extraction services in a large National Health Service Foundation Trust hospital. | Jackson R.; Kartoglu I.; Stringer C.; Gorrell G.; Roberts A.; Song X.; Wu H.; Agrawal A.; Lui K.; Groza T.; Lewsley D.; Northwood D.; Folarin A.; Stewart R.; Dobson R. | 2018 | BMC medical informatics and decision making                                    | 10.1186/s12911-018-0623-9      | Non-cardiology focus       |
| April 2020 | Feasibility of a voice-enabled automated platform for medical data collection: CardioCube                                                                  | Jadczyk, T.; Kiwic, O.; Khandwalla, R.M.; Grabowski, K.; Rudawski, S.; Magaczewski, P.; Benyahia, H.; Wojakowski, W.; Henry, T.D.                                       | 2019 | International Journal of Medical Informatics                                   | 10.1016/j.ijmedinf.2019.07.001 | No NLP focus/details       |
| April 2020 | Building a Semantic Interoperability Framework for Care and Research in Fibromuscular Dysplasia.                                                           | Jaulent MC.; Assv@IV@-Kama A.; Savard S.; Giavarini A.; Touzv@ E.; JeunemaV@tre X.; Ugon A.; Plouin PF.; Toubiana L.                                                    | 2015 | Studies in health technology and informatics                                   |                                | Non-cardiology focus       |
| April 2020 | Artificial intelligence in healthcare: past, present and future.                                                                                           | Jiang F.; Jiang Y.; Zhi H.; Dong Y.; Li H.; Ma S.; Wang Y.; Dong Q.; Shen H.; Wang Y.                                                                                   | 2017 | Stroke and vascular neurology                                                  | 10.1136/svn-2017-000101        | Review/perspective article |



|            |                                                                                                                                                     |                                                                                                                                             |      |                                                                                                 |                                                                                                                           |                      |
|------------|-----------------------------------------------------------------------------------------------------------------------------------------------------|---------------------------------------------------------------------------------------------------------------------------------------------|------|-------------------------------------------------------------------------------------------------|---------------------------------------------------------------------------------------------------------------------------|----------------------|
| April 2020 | Predictors associated with development of pleural and pericardial effusions in patients with small cell lung cancer treated with third-line therapy | Jiang R.; Koch M.; Gulbranson S.; Komarnitsky P.B.; Papademetriou E.; Tyczynski J.E.                                                        | 2019 | Journal of Clinical Oncology                                                                    | <a href="http://dx.doi.org/10.1200/JCO.2019.37.15_suppl.e20088">http://dx.doi.org/10.1200/JCO.2019.37.15_suppl.e20088</a> | Non-cardiology focus |
| April 2020 | Differences Analysis of HRV in Time and Meridians Based on Multi-lead ECG Signals                                                                   | Jihong Liu; Xinyu Xu; Guangwei Zhang; Simeng Wu; Mingzhen Liu; Yuning Zhou                                                                  | 2018 | Proceedings of the 2018 2nd International Conference on Algorithms, Computing and Systems       | 10.1145/3242840.3242841                                                                                                   | No NLP focus/details |
| April 2020 | MedFit: A Mobile Application for Patients in CVD Recovery                                                                                           | Jogile Kuklyte; Leonardo Gualano; Ghanashyama Prabhu; Kaushik Venkataraman; Deirdre Walsh; Catherine Woods; Kieran Moran; Noel E. O'Connell | 2017 | Proceedings of the 2nd International Workshop on Multimedia for Personal Health and Health Care | 10.1145/3132635.3132651                                                                                                   | No NLP focus/details |
| April 2020 | Social Assistive Robot for Cardiac Rehabilitation: A Pilot Study with Patients with Angioplasty                                                     | Jonathan Casas; Bahar Irfan; Emmanuel Senft; Luisa Gutiv@rrez; Monica Rincon-Roncancio; Marcela Munera; Tony Belpaeme; Carlos A. Cifuentes  | 2018 | Companion of the 2018 ACM/IEEE International Conference on Human-Robot Interaction              | 10.1145/3173386.3177052                                                                                                   | No NLP focus/details |
| April 2020 | Epidemiology of nontuberculous mycobacterial infections in the U.S. Veterans Health Administration.                                                 | Jones MM.; Winthrop KL.; Nelson SD.; Duvall SL.; Patterson OV.; Nechodom KE.; Findley KE.; Radonovich L.J.; Samore MH.; Fennelly KP.        | 2018 | PloS one                                                                                        | 10.1371/journal.pone.0197976                                                                                              | Non-cardiology focus |

|            |                                                                                                                                                                        |                                                                                   |      |                                                                                                                 |                           |                      |
|------------|------------------------------------------------------------------------------------------------------------------------------------------------------------------------|-----------------------------------------------------------------------------------|------|-----------------------------------------------------------------------------------------------------------------|---------------------------|----------------------|
| April 2020 | Monitoring obstructive sleep apnea with electrocardiography and 3-axis acceleration sensor                                                                             | Jong-Ha Lee; Hee-Jun Park; Yoon-Nyun Kim                                          | 2015 | Proceedings of the 8th ACM International Conference on Pervasive Technologies Related to Assistive Environments | 10.1145/2769493.2769522   | No NLP focus/details |
| April 2020 | Coronary artery disease risk assessment from unstructured electronic health records using text mining.                                                                 | Jonnagaddala J.; Liaw ST.; Ray P.; Kumar M.; Chang NW.; Dai HJ.                   | 2015 | Journal of biomedical informatics                                                                               | 10.1016/j.jbi.2015.08.003 | Duplicate            |
| April 2020 | Coronary artery disease risk assessment from unstructured electronic health records using text mining                                                                  | Jonnagaddala, J.; Liaw, S. T.; Ray, P.; Kumar, M.; Chang, N.-W.; Dai, H.-J.       | 2015 | Journal of Biomedical Informatics                                                                               | 10.1016/j.jbi.2015.08.003 | Non-cardiology focus |
| April 2020 | Text Mining of the Electronic Health Record: An Information Extraction Approach for Automated Identification and Subphenotyping of HFpEF Patients for Clinical Trials. | Jonnalagadda SR.; Adupa AK.; Garg RP.; Corona-Cox J.; Shah SJ.                    | 2017 | Journal of cardiovascular translational research                                                                | 10.1007/s12265-017-9752-2 | Included             |
| April 2020 | Health informatics: A new hope for familial hypercholesterolemia                                                                                                       | Joseph A.P.; Mullett C.J.; Armistead M.; Cox J.; Denney M.; Neal W.A.; Pyles L.A. | 2018 | Circulation                                                                                                     |                           | Abstract only        |
| April 2020 | Harnessing multiple source test cases in metamorphic testing: a case study in bioinformatics                                                                           | Joshua Y. S. Tang; Andrian Yang; Tsong Yueh Chen; Joshua W. K. Ho                 | 2017 | Proceedings of the 2nd International Workshop on Metamorphic Testing                                            |                           | Non-cardiology focus |
| April 2020 | ROI Localization and Initialization Method for Left Ventricle Segmentation                                                                                             | Junchi Lu; Chaolu Feng; Wei Li; Dazhe Zhao                                        | 2019 | Proceedings of the Third International Symposium on Image Computing and Digital Medicine                        | 10.1145/3364836.3364839   | No NLP focus/details |

|            |                                                                                                                                                  |                                                                                                                               |      |                                                                                    |                                                                                                       |                      |
|------------|--------------------------------------------------------------------------------------------------------------------------------------------------|-------------------------------------------------------------------------------------------------------------------------------|------|------------------------------------------------------------------------------------|-------------------------------------------------------------------------------------------------------|----------------------|
| April 2020 | Using local lexicalized rules to identify heart disease risk factors in clinical notes                                                           | Karystianis G.; Dehghan A.; Kovacevic A.; Keane J.A.; Nenadic G.                                                              | 2015 | Journal of Biomedical Informatics                                                  | <a href="http://dx.doi.org/10.1016/j.jbi.2015.06.013">http://dx.doi.org/10.1016/j.jbi.2015.06.013</a> | Duplicate            |
| April 2020 | Using local lexicalized rules to identify heart disease risk factors in clinical notes.                                                          | Karystianis G.; Dehghan A.; Kovacevic A.; Keane JA.; Nenadic G.                                                               | 2015 | Journal of biomedical informatics                                                  | 10.1016/j.jbi.2015.06.013                                                                             | Non-cardiology focus |
| April 2020 | Underestimated prevalence of heart failure in hospital inpatients: a comparison of ICD codes and discharge letter information.                   | Kaspar M.; Fette G.; Gvøder G.; Seidlmayer L.; Ertl M.; Dietrich G.; Greger H.; Puppe F.; Stvørk S.                           | 2018 | Clinical research in cardiology : official journal of the German Cardiac Society   | 10.1007/s00392-018-1245-z                                                                             | Included             |
| April 2020 | Natural Language Processing-Enabled and Conventional Data Capture Methods for Input to Electronic Health Records: A Comparative Usability Study. | Kaufman DR.; Sheehan B.; Stetson P.; Bhatt AR.; Field AI.; Patel C.; Maisel JM.                                               | 2016 | JMIR medical informatics                                                           | 10.2196/medinform.5544                                                                                | Non-cardiology focus |
| April 2020 | Automated chart review utilizing natural language processing algorithm for asthma predictive index.                                              | Kaur H.; Sohn S.; Wi Cl.; Ryu E.; Park MA.; Bachman K.; Kita H.; Croghan I.; Castro-Rodriguez JA.; Voge GA.; Liu H.; Juhn YJ. | 2018 | BMC pulmonary medicine                                                             | 10.1186/s12890-018-0593-9                                                                             | Non-cardiology focus |
| April 2020 | The feature extraction of ECG signal in myocardial infarction patients                                                                           | Ketcham, M.; Muankid, A.                                                                                                      | 2018 | Advances in Intelligent Systems and Computing                                      | 10.1007/978-3-319-70016-8_14                                                                          | No NLP focus/details |
| April 2020 | AfibPred: A Novel Atrial Fibrillation Prediction Approach based on Short Single-Lead ECG Using Deep Transfer Knowledge                           | Khadidja Benchaira; Salim Bitam; Abdelhamid Mellouk; Adel Tahri; Ridha Okbi                                                   | 2019 | Proceedings of the 4th International Conference on Big Data and Internet of Things | 10.1145/3372938.3372964                                                                               | No NLP focus/details |
| April 2020 | Adapting existing natural language processing resources for cardiovascular risk factors identification in clinical notes.                        | Khalifa A.; Meystre S.                                                                                                        | 2015 | Journal of biomedical informatics                                                  | 10.1016/j.jbi.2015.08.002                                                                             | Duplicate            |

|            |                                                                                                                                                    |                                                                                                                                                                  |      |                                                       |                                                                                                                       |                            |
|------------|----------------------------------------------------------------------------------------------------------------------------------------------------|------------------------------------------------------------------------------------------------------------------------------------------------------------------|------|-------------------------------------------------------|-----------------------------------------------------------------------------------------------------------------------|----------------------------|
| April 2020 | Adapting existing natural language processing resources for cardiovascular risk factors identification in clinical notes                           | Khalifa A.; Meystre S.                                                                                                                                           | 2015 | Journal of Biomedical Informatics                     | <a href="http://dx.doi.org/10.1016/j.jbi.2015.08.002">http://dx.doi.org/10.1016/j.jbi.2015.08.002</a>                 | Non-cardiology focus       |
| April 2020 | Artificial Intelligence and Machine Learning in Cardiovascular Healthcare.                                                                         | Kilic A.                                                                                                                                                         | 2019 | The Annals of thoracic surgery                        | 10.1016/j.athoracsur.2019.09.042                                                                                      | Review/perspective article |
| April 2020 | Classification of Contextual Use of Left Ventricular Ejection Fraction Assessments.                                                                | Kim Y.; Garvin J.; Goldstein MK.; Meystre SM.                                                                                                                    | 2015 | Studies in health technology and informatics          |                                                                                                                       | Similar study              |
| April 2020 | Extraction of left ventricular ejection fraction information from various types of clinical reports.                                               | Kim Y.; Garvin JH.; Goldstein MK.; Hwang TS.; Redd A.; Bolton D.; Heidenreich PA.; Meystre SM.                                                                   | 2017 | Journal of biomedical informatics                     | 10.1016/j.jbi.2017.01.017                                                                                             | Similar study              |
| April 2020 | A Study of Concept Extraction Across Different Types of Clinical Notes.                                                                            | Kim Y.; Riloff E.; Hurdle JF.                                                                                                                                    | 2015 | AMIA ... Annual Symposium proceedings. AMIA Symposium |                                                                                                                       | Non-cardiology focus       |
| April 2020 | Social media mining for birth defects research: A rule-based, bootstrapping approach to collecting data for rare health-related events on Twitter. | Klein AZ.; Sarker A.; Cai H.; Weissenbacher D.; Gonzalez-Hernandez G.                                                                                            | 2018 | Journal of biomedical informatics                     | 10.1016/j.jbi.2018.10.001                                                                                             | Non-cardiology focus       |
| April 2020 | THE ADDITIONAL VALUE OF NATURAL LANGUAGE PROCESSING TO IDENTIFY DISEASE PREVALENCE BASED ON ELECTRONIC MEDICAL RECORD IMAGING REPORTS              | Kocyigit D.; Milinovich A.; Lee C.M.; Hanna M.; Gabrovesk A.; Jin J.; Silverman M.; Ahmad M.; Tang W.H.W.; Grimm R.A.; Cho L.; Griffin B.P.; Flamm S.D.; Kwon D. | 2020 | Journal of the American College of Cardiology         | <a href="http://dx.doi.org/10.1016/S0735-1097%2820%2934269-8">http://dx.doi.org/10.1016/S0735-1097%2820%2934269-8</a> | Abstract only              |

|            |                                                                                                                                                                               |                                                                                                                                                                  |      |                                                                                                 |                                                                                                                       |                            |
|------------|-------------------------------------------------------------------------------------------------------------------------------------------------------------------------------|------------------------------------------------------------------------------------------------------------------------------------------------------------------|------|-------------------------------------------------------------------------------------------------|-----------------------------------------------------------------------------------------------------------------------|----------------------------|
| April 2020 | PERFORMANCE AND ACCURACY OF NATURAL LANGUAGE PROCESSING TO IDENTIFY DISEASE ETIOLOGY FROM NON-STRUCTURED CARDIAC MAGNETIC RESONANCE IMAGING ELECTRONIC MEDICAL RECORD REPORTS | Kocyigit D.; Milinovich A.; Lee C.M.; Silverman M.; Ahmad M.; Hanna M.; Gabrovesk A.; Jin J.; Tang W.H.W.; Grimm R.A.; Cho L.; Griffin B.P.; Flamm S.D.; Kwon D. | 2020 | Journal of the American College of Cardiology                                                   | <a href="http://dx.doi.org/10.1016/S0735-1097%2820%2934266-2">http://dx.doi.org/10.1016/S0735-1097%2820%2934266-2</a> | Abstract only              |
| April 2020 | Natural language processing of symptoms documented in free-text narratives of electronic health records: a systematic review.                                                 | Koleck TA.; Dreisbach C.; Bourne PE.; Bakken S.                                                                                                                  | 2019 | Journal of the American Medical Informatics Association : JAMIA                                 | 10.1093/jamia/ocy173                                                                                                  | Review/perspective article |
| April 2020 | A systematic comparison of feature space effects on disease classifier performance for phenotype identification of five diseases.                                             | Kotfila C.; Uzuner vñ.                                                                                                                                           | 2015 | Journal of biomedical informatics                                                               | 10.1016/j.jbi.2015.07.016                                                                                             | Duplicate                  |
| April 2020 | A systematic comparison of feature space effects on disease classifier performance for phenotype identification of five diseases                                              | Kotfila C.; Uzuner O.                                                                                                                                            | 2015 | Journal of Biomedical Informatics                                                               | <a href="http://dx.doi.org/10.1016/j.jbi.2015.07.016">http://dx.doi.org/10.1016/j.jbi.2015.07.016</a>                 | Non-cardiology focus       |
| April 2020 | Finding Needles in the Haystack: Identifying Patients with Rare Subtype of Multiple Myeloma Supported by a Data Warehouse and Information Extraction.                         | Krebs J.; Bittrich M.; Dietrich G.; Ertl M.; Fette G.; Kaspar M.; Liman L.; Einsele H.; Puppe F.; Knop S.                                                        | 2018 | Studies in health technology and informatics                                                    |                                                                                                                       | Non-cardiology focus       |
| April 2020 | Big data in the clinic using data to guide practice                                                                                                                           | Krupinski, E.A.                                                                                                                                                  | 2016 | Proceedings - 2016 International Conference on Collaboration Technologies and Systems, CTS 2016 | 10.1109/CTS.2016.94                                                                                                   | No NLP focus/details       |

|            |                                                                                                                                                                                      |                                                                                                                                                    |      |                                                                              |                                                                                                       |                            |
|------------|--------------------------------------------------------------------------------------------------------------------------------------------------------------------------------------|----------------------------------------------------------------------------------------------------------------------------------------------------|------|------------------------------------------------------------------------------|-------------------------------------------------------------------------------------------------------|----------------------------|
| April 2020 | Completeness in the abstraction of cardiac biomarkers and cardiac pain data from electronic health records (EHR). Findings from the atherosclerosis risk in communities (ARIC) study | Kucharska-Newton A.; Bullo M.; Loop M.; Moore C.; Haas S.W.; Rosamond W.; Futrell W.; Luo K.; Yadav H.; Bogle B.                                   | 2018 | Circulation                                                                  |                                                                                                       | Abstract only              |
| April 2020 | Creation of a new longitudinal corpus of clinical narratives.                                                                                                                        | Kumar V.; Stubbs A.; Shaw S.; Uzuner Vñ.                                                                                                           | 2015 | Journal of biomedical informatics                                            | 10.1016/j.jbi.2015.09.018                                                                             | Non-cardiology focus       |
| April 2020 | Balance between Performance and Security in IPI-based Key Schemes using Heartbeats                                                                                                   | Kwantae Cho; Juyoung Kim                                                                                                                           | 2017 | Proceedings of the 9th International Conference on Signal Processing Systems | 10.1145/3163080.3163111                                                                               | No NLP focus/details       |
| April 2020 | SEMCARE: Multilingual Semantic Search in Semi-Structured Clinical Data.                                                                                                              | Lv≥pez-Garcv#a P.; Kreuzthaler M.; Schulz S.; Scherr D.; Daumke P.; Markv≥ K.; Kors JA.; van Mulligen EM.; Wang X.; Gonna H.; Behr E.; Honrado vÅ. | 2016 | Studies in health technology and informatics                                 |                                                                                                       | Non-cardiology focus       |
| April 2020 | Machine Learning in Cardiac CT                                                                                                                                                       | Landreth S.P.; Spearman J.V.                                                                                                                       | 2017 | Current Radiology Reports                                                    | <a href="http://dx.doi.org/10.1007/s40134-017-0241-9">http://dx.doi.org/10.1007/s40134-017-0241-9</a> | Review/perspective article |
| April 2020 | Driving pressure is not associated with mortality in mechanically ventilated patients without ARDS.                                                                                  | Lanspa MJ.; Peltan ID.; Jacobs JR.; Sorensen JS.; Carpenter L.; Ferraro JP.; Brown SM.; Berry JG.; Srivastava R.; Grissom CK.                      | 2019 | Critical care (London, England)                                              | 10.1186/s13054-019-2698-9                                                                             | Non-cardiology focus       |
| April 2020 | Tool-use-associated sound in the evolution of language.                                                                                                                              | Larsson M.                                                                                                                                         | 2015 | Animal cognition                                                             | 10.1007/s10071-015-0885-x                                                                             | Non-cardiology focus       |

|            |                                                                                                                                                        |                                                                |      |                                                                                                                 |                                                                                                                       |                      |
|------------|--------------------------------------------------------------------------------------------------------------------------------------------------------|----------------------------------------------------------------|------|-----------------------------------------------------------------------------------------------------------------|-----------------------------------------------------------------------------------------------------------------------|----------------------|
| April 2020 | Connecting the dots: From big data to healthy heart                                                                                                    | Lau E.; Watson K.E.; Ping P.                                   | 2016 | Circulation                                                                                                     | <a href="http://dx.doi.org/10.1161/CIRCULATIONAHA.116.021892">http://dx.doi.org/10.1161/CIRCULATIONAHA.116.021892</a> | No NLP focus/details |
| April 2020 | IoT for remote wireless electrophysiological monitoring: proof of concept                                                                              | Laura Pravato; Thomas E. Doyle                                 | 2017 | Proceedings of the 27th Annual International Conference on Computer Science and Software Engineering            |                                                                                                                       | No NLP focus/details |
| April 2020 | An automated framework for predicting obstructive sleep apnea using a brief, daytime, non-intrusive test procedure                                     | Lauren Samy; Paul M. Macey; Nabil Alshurafa; Majid Sarrafzadeh | 2015 | Proceedings of the 8th ACM International Conference on Pervasive Technologies Related to Assistive Environments | 10.1145/2769493.2769541                                                                                               | Non-cardiology focus |
| April 2020 | Redesigning the Trans-disciplinary: Working Across Design, Craft and Technological Boundaries to Deliver an Integrated Wearable for Cardiac Monitoring | Leah Heiss; Paul Beckett; Amy Carr-Bottomley                   | 2016 | Proceedings of the 2016 ACM Conference on Designing Interactive Systems                                         | 10.1145/2901790.2901794                                                                                               | No NLP focus/details |
| April 2020 | Wavelet Transform Based ECG Denoising Using Adaptive Thresholding                                                                                      | Lei Wang; Wei Sun; Yibo Chen; Peng Li; Lingxiao Zhao           | 2018 | Proceedings of the 2018 7th International Conference on Bioinformatics and Biomedical Science                   | 10.1145/3239264.3239272                                                                                               | No NLP focus/details |
| April 2020 | High-throughput analysis of full-text cardiac catheterization reports using open-source natural language processing and machine learning tools         | Levin M.G.; Small A.M.; Giri J.S.; Rader D.J.; Damrauer S.M.   | 2017 | Circulation                                                                                                     |                                                                                                                       | Abstract only        |

|            |                                                                                                                                                                                       |                                                                         |      |                                                                                                    |                           |                      |
|------------|---------------------------------------------------------------------------------------------------------------------------------------------------------------------------------------|-------------------------------------------------------------------------|------|----------------------------------------------------------------------------------------------------|---------------------------|----------------------|
| April 2020 | Determining post-test risk in a national sample of stress nuclear myocardial perfusion imaging reports: Implications for natural language processing tools.                           | Levy AE.; Shah NR.; Matheny ME.; Reeves RM.; Gobbel GT.; Bradley SM.    | 2019 | Journal of nuclear cardiology : official publication of the American Society of Nuclear Cardiology | 10.1007/s12350-018-1275-y | Similar study        |
| April 2020 | An investigation of single-domain and multidomain medication and adverse drug event relation extraction from electronic health record notes using advanced deep learning models.      | Li F.; Yu H.                                                            | 2019 | Journal of the American Medical Informatics Association : JAMIA                                    | 10.1093/jamia/ocz018      | Non-cardiology focus |
| April 2020 | A novel approach for arrhythmia diagnosis: Self-adaptive and distribution-free mode.                                                                                                  | Li F.; Zheng D.; Zhao T.                                                | 2015 | Bio-medical materials and engineering                                                              | 10.3233/BME-151400        | No NLP focus/details |
| April 2020 | Detection of Bleeding Events in Electronic Health Record Notes Using Convolutional Neural Network Models Enhanced With Recurrent Neural Network Autoencoders: Deep Learning Approach. | Li R.; Hu B.; Liu F.; Liu W.; Cunningham F.; McManus DD.; Yu H.         | 2019 | JMIR medical informatics                                                                           | 10.2196/10788             | Non-cardiology focus |
| April 2020 | Analysis of care pathway variation patterns in patient records.                                                                                                                       | Li X.; Mei J.; Liu H.; Yu Y.; Xie G.; Hu J.; Wang F.                    | 2015 | Studies in health technology and informatics                                                       |                           | No NLP focus/details |
| April 2020 | Detection of bleeding events in electronic health record notes using convolutional neural network models enhanced with recurrent neural network autoencoders: Deep learning approach  | Li, R.; Hu, B.; Liu, F.; Liu, W.; Cunningham, F.; McManus, D.D.; Yu, H. | 2019 | Journal of Medical Internet Research                                                               | 10.2196/10788             | Duplicate            |



|            |                                                                                                                                                      |                                                                                                                                                                                                                                                                                           |      |                                        |                                                                                                                       |                      |
|------------|------------------------------------------------------------------------------------------------------------------------------------------------------|-------------------------------------------------------------------------------------------------------------------------------------------------------------------------------------------------------------------------------------------------------------------------------------------|------|----------------------------------------|-----------------------------------------------------------------------------------------------------------------------|----------------------|
| April 2020 | Methods to Develop an Electronic Medical Record Phenotype Algorithm to Compare the Risk of Coronary Artery Disease across 3 Chronic Disease Cohorts. | Liao KP.;<br>Ananthakrishnan AN.;<br>Kumar V.; Xia Z.; Cagan A.; Gainer VS.;<br>Goryachev S.; Chen P.;<br>Savova GK.; Agniel D.;<br>Churchill S.; Lee J.;<br>Murphy SN.; Plenge RM.; Szolovits P.;<br>Kohane I.; Shaw SY.;<br>Karlson EW.; Cai T.                                         | 2015 | PloS one                               | 10.1371/journal.pone.0136651                                                                                          | Non-cardiology focus |
| April 2020 | Natural language processing: An opportunity to make chart data come alive in palliative care research                                                | Lindvall C.; Forsyth A.;<br>Barzilay R.; Tulskey J.                                                                                                                                                                                                                                       | 2017 | Journal of Pain and Symptom Management | <a href="http://dx.doi.org/10.1016/j.jpainsymman.2016.12.164">http://dx.doi.org/10.1016/j.jpainsymman.2016.12.164</a> | Abstract only        |
| April 2020 | Developing an Algorithm to Detect Early Childhood Obesity in Two Tertiary Pediatric Medical Centers.                                                 | Lingren T.; Thaker V.;<br>Brady C.; Namjou B.;<br>Kennebeck S.; Bickel J.;<br>Patibandla N.; Ni Y.; Van Driest SL.; Chen L.;<br>Roach A.; Cobb B.; Kirby J.; Denny J.; Bailey-Davis L.; Williams MS.;<br>Marsolo K.; Solti I.; Holm IA.; Harley J.; Kohane IS.;<br>Savova G.; Crimmins N. | 2016 | Applied clinical informatics           | 10.4338/ACI-2016-01-RA-0015                                                                                           | Non-cardiology focus |

|            |                                                                                                                                                                                    |                                                                                                                                                                                                                                                                                                                                                                                                                                                                                                                                             |      |               |                              |                      |
|------------|------------------------------------------------------------------------------------------------------------------------------------------------------------------------------------|---------------------------------------------------------------------------------------------------------------------------------------------------------------------------------------------------------------------------------------------------------------------------------------------------------------------------------------------------------------------------------------------------------------------------------------------------------------------------------------------------------------------------------------------|------|---------------|------------------------------|----------------------|
| April 2020 | Age-related cognitive decline and associations with sex, education and apolipoprotein E genotype across ethnocultural groups and geographic regions: a collaborative cohort study. | Lipnicki DM.; Crawford JD.; Dutta R.; Thalamuthu A.; Kochan NA.; Andrews G.; Lima-Costa MF.; Castro-Costa E.; Brayne C.; Matthews FE.; Stephan BC.; Lipton RB.; Katz MJ.; Ritchie K.; Scali J.; Ancelin ML.; Scarmeas N.; Yannakoulia M.; Dardiotis E.; Lam LC.; Wong CH.; Fung AW.; Guaita A.; Vaccaro R.; Davin A.; Kim KW.; Han JW.; Kim TH.; Anstey KJ.; Cherbuin N.; Butterworth P.; Scazufca M.; Kumagai S.; Chen S.; Narazaki K.; Ng TP.; Gao Q.; Reppermund S.; Brodaty H.; Lobo A.; Lopez-Anton R.; Santabábara J.; Sachdev PS.; . | 2017 | PLoS medicine | 10.1371/journal.pmed.1002261 | Non-cardiology focus |
|------------|------------------------------------------------------------------------------------------------------------------------------------------------------------------------------------|---------------------------------------------------------------------------------------------------------------------------------------------------------------------------------------------------------------------------------------------------------------------------------------------------------------------------------------------------------------------------------------------------------------------------------------------------------------------------------------------------------------------------------------------|------|---------------|------------------------------|----------------------|

|            |                                                                                                                             |                                                                                                                                                                                                                                                                                                                                                                                                                                                                                                                                                                                                                                                                                                                                                     |      |                                                         |                                                                                             |                      |
|------------|-----------------------------------------------------------------------------------------------------------------------------|-----------------------------------------------------------------------------------------------------------------------------------------------------------------------------------------------------------------------------------------------------------------------------------------------------------------------------------------------------------------------------------------------------------------------------------------------------------------------------------------------------------------------------------------------------------------------------------------------------------------------------------------------------------------------------------------------------------------------------------------------------|------|---------------------------------------------------------|---------------------------------------------------------------------------------------------|----------------------|
| April 2020 | Determinants of cognitive performance and decline in 20 diverse ethno-regional groups: A COSMIC collaboration cohort study. | SR.; Crawford JD.; Thalamuthu A.; Kochan NA.; Lima-Costa MF.; Castro-Costa E.; Ferri CP.; Brayne C.; Stephan B.; Llibre-Rodriguez JJ.; Llibre-Guerra JJ.; Valhuerdi-Cepero AJ.; Lipton RB.; Katz MJ.; Derby CA.; Ritchie K.; Ancelin ML.; Carriv <sup>®</sup> re I.; Scarmeas N.; Yannakoulia M.; Hadjigeorgiou GM.; Lam L.; Chan WC.; Fung A.; Guaita A.; Vaccaro R.; Davin A.; Kim KW.; Han JW.; Suh SW.; Riedel-Heller SG.; Roehr S.; Pabst A.; van Boxtel M.; Kvðhler S.; Deckers K.; Ganguli M.; Jacobsen EP.; Hughes TF.; Anstey KJ.; Cherbuin N.; Haan MN.; Aiello AE.; Dang K.; Kumagai S.; Chen T.; Narazaki K.; Ng TP.; Gao Q.; Nyunt MSZ.; Scazufca M.; Brodaty H.; Numbers K.; Trollor JN.; Meguro K.; Yamaguchi S.; Ishii H.; Lobo A.; | 2019 | PLoS medicine                                           | 10.1371/journal.pmed.1002853                                                                | Non-cardiology focus |
| April 2020 | Learning to detect and understand drug discontinuation events from clinical narratives                                      | Liu F.; Pradhan R.; Druhl E.; Freund E.; Liu W.; Sauer B.C.; Cunningham F.; Gordon A.J.; Peters C.B.; Yu H.                                                                                                                                                                                                                                                                                                                                                                                                                                                                                                                                                                                                                                         | 2019 | Journal of the American Medical Informatics Association | <a href="http://dx.doi.org/10.1093/jamia/ocz048">http://dx.doi.org/10.1093/jamia/ocz048</a> | Non-cardiology focus |

|            |                                                                                                                                         |                                                                                                         |      |                                                                                               |                                                                                                       |                      |
|------------|-----------------------------------------------------------------------------------------------------------------------------------------|---------------------------------------------------------------------------------------------------------|------|-----------------------------------------------------------------------------------------------|-------------------------------------------------------------------------------------------------------|----------------------|
| April 2020 | A research framework for pharmacovigilance in health social media: Identification and evaluation of patient adverse drug event reports. | Liu X.; Chen H.                                                                                         | 2015 | Journal of biomedical informatics                                                             | 10.1016/j.jbi.2015.10.011                                                                             | Non-cardiology focus |
| April 2020 | Automatic de-identification of electronic medical records using token-level and character-level conditional random fields.              | Liu Z.; Chen Y.; Tang B.; Wang X.; Chen Q.; Li H.; Wang J.; Deng Q.; Zhu S.                             | 2015 | Journal of biomedical informatics                                                             | 10.1016/j.jbi.2015.06.009                                                                             | Non-cardiology focus |
| April 2020 | Artificial Intelligence Methods for Real-Time Pharmacovigilance Monitoring to Predict Adverse Cardiac Events                            | Lu J.; Dwivedi G.; Bennamoun M.; Sohel F.; An S.; Rankin J.; Sanfilippo F.                              | 2019 | Heart Lung and Circulation                                                                    | <a href="http://dx.doi.org/10.1016/j.hlc.2019.06.352">http://dx.doi.org/10.1016/j.hlc.2019.06.352</a> | Abstract only        |
| April 2020 | Three-Dimensional Reconstruction of Cardiac Structures Using CT Images                                                                  | Luis Lopez Diaz; Andersson Contreras Olmos; Alberto Cadena; Winston S. Percybrooks; Juan Pablo Tello P. | 2018 | Proceedings of the 2018 3rd International Conference on Biomedical Imaging, Signal Processing | 10.1145/3288200.3288210                                                                               | No NLP focus/details |
| April 2020 | Identification of Normal and Abnormal Heart Sounds by Prominent Peak Analysis                                                           | M.G.M. Milani; Pg Emeroylariffion Abas; Liyanage C. De Silva                                            | 2019 | Proceedings of the 2019 International Symposium on Signal Processing Systems                  | 10.1145/3364908.3364924                                                                               | No NLP focus/details |
| April 2020 | A data mining approach to predict risk of cardiovascular                                                                                | Ma, S.; Chen, X.                                                                                        | 2019 | AIP Conference Proceedings                                                                    | 10.1063/1.5085527                                                                                     | Non-cardiology focus |
| April 2020 | Cloud-based Graphical Simulation Tool of ECG for Educational Purpose                                                                    | Mabrook Al-Rakhami; Ahmad Alhamed                                                                       | 2016 | Proceedings of the International Conference on Internet of things and Cloud Computing         | 10.1145/2896387.2896410                                                                               | No NLP focus/details |

|            |                                                                                                                                       |                                                                                                                        |      |                                                                                         |                                         |                      |
|------------|---------------------------------------------------------------------------------------------------------------------------------------|------------------------------------------------------------------------------------------------------------------------|------|-----------------------------------------------------------------------------------------|-----------------------------------------|----------------------|
| April 2020 | Natural Language Processing and the Promise of Big Data: Small Step Forward, but Many Miles to Go.                                    | Maddox TM.; Matheny MA.                                                                                                | 2015 | Circulation. Cardiovascular quality and outcomes                                        | 10.1161/CIRCO<br>UTCOMES.115.<br>002125 | Non-cardiology focus |
| April 2020 | Combining Structured and Unstructured Data for Predicting Risk of Readmission for Heart Failure Patients.                             | Mahajan SM.; Ghani R.                                                                                                  | 2019 | Studies in health technology and informatics                                            | 10.3233/SHTI1<br>90219                  | Included             |
| April 2020 | Use of electronic medical records in development and validation of risk prediction models of hospital readmission: systematic review. | Mahmoudi E.; Kamdar N.; Kim N.; Gonzales G.; Singh K.; Waljee AK.                                                      | 2020 | BMJ (Clinical research ed.)                                                             | 10.1136/bmj.m<br>958                    | Non-cardiology focus |
| April 2020 | PM2.5-related health and economic loss assessment for 338 Chinese cities.                                                             | Maji KJ.; Ye WF.; Arora M.; Shiva Nagendra SM.                                                                         | 2018 | Environment international                                                               | 10.1016/j.envin<br>t.2018.09.024        | Non-cardiology focus |
| April 2020 | PM $>2.5$ -related health and economic loss assessment for 338 Chinese cities                                                         | Maji, K.J.; Ye, W.-F.; Arora, M.; Shiva Nagendra, S.M.                                                                 | 2018 | Environment International                                                               | 10.1016/j.envin<br>t.2018.09.024        | Non-cardiology focus |
| April 2020 | ECG Signal Processing with Haar-Schauder Multiwavelet                                                                                 | Makerem Zemni; Malika Jallouli; Anouar Ben Mabrouk; Mohamed Ali Mahjoub                                                | 2019 | Proceedings of the 9th International Conference on Information Systems and Technologies | 10.1145/33615<br>70.3361611             | No NLP focus/details |
| April 2020 | Thighrim and Calf-Life: A Study of the Conversion of Off-the-Shelf Video Games into Exergames                                         | Mallory Ketcheson; Luke Walker; T.C. Nicholas Graham                                                                   | 2016 | Proceedings of the 2016 CHI Conference on Human Factors in Computing Systems            | 10.1145/28580<br>36.2858406             | No NLP focus/details |
| April 2020 | Acute coronary syndromes in the community.                                                                                            | Manemann SM.; Gerber Y.; Chamberlain AM.; Dunlay SM.; Bell MR.; Jaffe AS.; Weston SA.; Killian JM.; Kors J.; Roger VL. | 2015 | Mayo Clinic proceedings                                                                 | 10.1016/j.mayo<br>cp.2015.02.015        | Similar study        |

|            |                                                                                                                                |                                                                                                                              |      |                                                                                                            |                                   |                      |
|------------|--------------------------------------------------------------------------------------------------------------------------------|------------------------------------------------------------------------------------------------------------------------------|------|------------------------------------------------------------------------------------------------------------|-----------------------------------|----------------------|
| April 2020 | Decision Support System for Check-up Tracks in Prevention of Cardiac Diseases                                                  | Manuel Amv@rico Rocha; SV@rgio Miguel Santos; Antv≥nio LVjcio Baptista                                                       | 2016 | Proceedings of the Ninth International C* Conference on Computer Science & Software Engineering            | 10.1145/2948992.2949020           | No NLP focus/details |
| April 2020 | Validation of Prediction Models for Critical Care Outcomes Using Natural Language Processing of Electronic Health Record Data. | Marafino BJ.; Park M.; Davies JM.; Thombley R.; Luft HS.; Sing DC.; Kazi DS.; DeJong C.; Boscardin WJ.; Dean ML.; Dudley RA. | 2018 | JAMA network open                                                                                          | 10.1001/jamanetworkopen.2018.5097 | Non-cardiology focus |
| April 2020 | Diagnostic Agents: Collaborative Interpretation for Cardiac Patients at Home                                                   | Maria Kvj¶rup; Stefania Kouzeli; Mikael B. Skov; Jesper Kjeldskov; Charlotte Schmidt Skov; Peter SV¶gaard                    | 2018 | Extended Abstracts of the 2018 CHI Conference on Human Factors in Computing Systems                        | 10.1145/3170427.3188630           | No NLP focus/details |
| April 2020 | Healthcare System Based on the Smart Monitoring Bracelets and Sentiment Analysis                                               | Marin, I.; Goga, N.                                                                                                          | 2018 | 2018 International Symposium on Fundamentals of Electrical Engineering, ISFEE 2018                         | 10.1109/ISFEE.2018.8742428        | Duplicate            |
| April 2020 | Sentiment Analysis Electronic Healthcare System Based on Heart Rate Monitoring Smart Bracelet                                  | Marin, I.; Goga, N.; Doncescu, A.                                                                                            | 2019 | Proceedings - IEEE 11th International Conference on Service-Oriented Computing and Applications, SOCA 2018 | 10.1109/SOCA.2018.00022           | Duplicate            |

|            |                                                                                                                                                                                                 |                                                                                                        |      |                                                                                       |                                                                                                                 |                            |
|------------|-------------------------------------------------------------------------------------------------------------------------------------------------------------------------------------------------|--------------------------------------------------------------------------------------------------------|------|---------------------------------------------------------------------------------------|-----------------------------------------------------------------------------------------------------------------|----------------------------|
| April 2020 | Application of natural language processing techniques to extract insights for pharmacovigilance from published literatures                                                                      | Matsuda S.; Ohtomo T.                                                                                  | 2019 | Pharmacoepidemiology and Drug Safety                                                  | <a href="http://dx.doi.org/10.1002/pds.4864">http://dx.doi.org/10.1002/pds.4864</a>                             | Non-cardiology focus       |
| April 2020 | Use of text-mining methods to improve efficiency in the calculation of drug exposure to support pharmacoepidemiology studies.                                                                   | McTaggart S.; Nangle C.; Caldwell J.; Alvarez-Madrado S.; Colhoun H.; Bennie M.                        | 2018 | International journal of epidemiology                                                 | 10.1093/ije/dyx264                                                                                              | Non-cardiology focus       |
| April 2020 | Evidence-based clinical decision support systems for the prediction and detection of three disease states in critical care: A systematic literature review [version 2; peer review: 2 approved] | Medic G.; Kliess M.K.; Atallah L.; Weichert J.; Panda S.; Postma M.; El-Kerdi A.                       | 2019 | F1000Research                                                                         | <a href="http://dx.doi.org/10.12688/f1000research.20498.1">http://dx.doi.org/10.12688/f1000research.20498.1</a> | Review/perspective article |
| April 2020 | Evidence-based Clinical Decision Support Systems for the prediction and detection of three disease states in critical care: A systematic literature review.                                     | Medic G.; Kosaner Klievü M.; Atallah L.; Weichert J.; Panda S.; Postma M.; El-Kerdi A.                 | 2019 | F1000Research                                                                         | 10.12688/f1000research.20498.2                                                                                  | Duplicate                  |
| April 2020 | Establishing a continuum of acute kidney injury - tracing AKI using data source linkage and long-term follow-up: Workgroup Statements from the 15th ADQI Consensus Conference                   | Mehta, R.; Bihorac, A.; Selby, N.M.; Quan, H.; Goldstein, S.L.; Kellum, J.A.; Ronco, C.; Bagshaw, S.M. | 2016 | Canadian Journal of Kidney Health and Disease                                         | 10.1186/s40697-016-0102-0                                                                                       | Non-cardiology focus       |
| April 2020 | Congestive heart failure information extraction framework for automated treatment performance measures assessment.                                                                              | Meystre SM.; Kim Y.; Gobbel GT.; Matheny ME.; Redd A.; Bray BE.; Garvin JH.                            | 2017 | Journal of the American Medical Informatics Association : JAMIA                       | 10.1093/jamia/ocw097                                                                                            | Similar study              |
| April 2020 | Heart Failure Medications Detection and Prescription Status Classification in Clinical Narrative Documents.                                                                                     | Meystre SM.; Kim Y.; Heavirland J.; Williams J.; Bray BE.; Garvin J.                                   | 2015 | Studies in health technology and informatics                                          |                                                                                                                 | Similar study              |
| April 2020 | LabelMerger: Learning activities in uncontrolled environments                                                                                                                                   | Mirzadeh, S.I.; Ardo, J.; Fallahzadeh, R.; Minor, B.; Evangelista, L.; Cook, D.; Ghasemzadeh, H.       | 2019 | Proceedings - 2019 1st International Conference on Transdisciplinary AI, TransAI 2019 | 10.1109/TransAI46475.2019.00019                                                                                 | Non-cardiology focus       |

|            |                                                                                                                                                                |                                                                                                                                                                                             |      |                                                                                       |                                                                                                                 |                      |
|------------|----------------------------------------------------------------------------------------------------------------------------------------------------------------|---------------------------------------------------------------------------------------------------------------------------------------------------------------------------------------------|------|---------------------------------------------------------------------------------------|-----------------------------------------------------------------------------------------------------------------|----------------------|
| April 2020 | Surveillance After Treatment of Non-Small-Cell Lung Cancer: A Call for Multidisciplinary Standardization.                                                      | Mitchell KG.; Nelson DB.; Corsini EM.; Correa AM.; Erasmus JJ.; Hofstetter WL.; Mehran RJ.; Roth JA.; Swisher SG.; Sepesi B.; Walsh GL.; Vaporciyan AA.; Rice DC.; Nguyen QN.; Antonoff MB. |      | Innovations (Philadelphia, Pa.)                                                       | 10.1177/1556984519886281                                                                                        | Non-cardiology focus |
| April 2020 | Three-Sensor Portable Information System for Physiological Data Registration                                                                                   | Mitko Gospodinov; Krasimir Cheshmedzhiev                                                                                                                                                    | 2019 | Proceedings of the 20th International Conference on Computer Systems and Technologies | 10.1145/3345252.3345281                                                                                         | Non-cardiology focus |
| April 2020 | Towards the construction of a gold standard biomedical corpus for the Romanian language                                                                        | Mitrofan, M.; Mititelu, V.B.; Mitrofan, G.                                                                                                                                                  | 2018 | Data                                                                                  | 10.3390/data3040053                                                                                             | Non-English          |
| April 2020 | Textual analysis of collaboration notes of the telemedical heart failure network HerzMobil Tirol.                                                              | Modre-Osprian R.; Gruber K.; Kreiner K.; Schreier G.; Poelzl G.; Kastner P.                                                                                                                 | 2015 | Studies in health technology and informatics                                          |                                                                                                                 | No NLP focus/details |
| April 2020 | Automated extraction of sudden cardiac death risk factors in hypertrophic cardiomyopathy patients by natural language processing.                              | Moon S.; Liu S.; Scott CG.; Samudrala S.; Abidian MM.; Geske JB.; Noseworthy PA.; Shellum JL.; Chaudhry R.; Ommen SR.; Nishimura RA.; Liu H.; Arruda-Olson AM.                              | 2019 | International journal of medical informatics                                          | 10.1016/j.ijmedinf.2019.05.008                                                                                  | Included             |
| April 2020 | An automated natural language processing algorithm to classify magnetic resonance imaging reports containing positive diagnoses of hypertrophic cardiomyopathy | Moon S.; Sagheb E.; Liu S.; Chen D.; Bos M.; Geske J.B.; Noseworthy P.A.; Ackerman M.J.; Shellum J.L.; Chaudhry R.; Ommen S.R.; Araoz P.A.; Nishimura R.A.; Liu H.; Arruda-Olson A.         | 2019 | Circulation                                                                           | <a href="http://dx.doi.org/10.1161/circ.140.suppl_1.13811">http://dx.doi.org/10.1161/circ.140.suppl_1.13811</a> | Abstract only        |



|            |                                                                                                                                                   |                                                                                                     |      |                                                                                               |                                                                                                                       |                      |
|------------|---------------------------------------------------------------------------------------------------------------------------------------------------|-----------------------------------------------------------------------------------------------------|------|-----------------------------------------------------------------------------------------------|-----------------------------------------------------------------------------------------------------------------------|----------------------|
| April 2020 | Automated identification of sudden death risk phenotypes from electronic health records of patients with hypertrophic cardiomyopathy              | Moon S.; Samudrala S.; Liu S.; Shellum J.L.; Ommen S.; Nishimura R.A.; Liu H.; Arruda-Olson A.      | 2018 | Journal of the American College of Cardiology                                                 | <a href="http://dx.doi.org/10.1016/S0735-1097%2818%2931440-2">http://dx.doi.org/10.1016/S0735-1097%2818%2931440-2</a> | Abstract only        |
| April 2020 | Medical concept intersection between outside medical records and consultant notes: A case study in transferred cardiovascular patients            | Moon, S.; Liu, S.; Kingsbury, P.; Chen, D.; Wang, Y.; Shen, F.; Chaudhry, R.; Liu, H.               | 2017 | Proceedings - 2017 IEEE International Conference on Bioinformatics and Biomedicine, BIBM 2017 | 10.1109/BIBM.2017.8217883                                                                                             | Non-cardiology focus |
| April 2020 | Streamlining and audio analysis device for doctor patient encounters                                                                              | Moore S.P.; Cassidy B.M.; Herbert S.A.; Winkelman J.W.; Spencer-Bearham D.M.; Slepian M.J.          | 2019 | ASAIO Journal                                                                                 | <a href="http://dx.doi.org/10.1097/MAT.00000000000001007">http://dx.doi.org/10.1097/MAT.00000000000001007</a>         | Non-cardiology focus |
| April 2020 | Using predictive modeling to manage cardiovascular risk and improve kidney transplant outcomes                                                    | Moran W.; Zhang J.; Su Z.; Taber D.; Mauldin P.; Srinivas T.                                        | 2016 | American Journal of Transplantation                                                           | <a href="http://dx.doi.org/10.1111/ajt.13897">http://dx.doi.org/10.1111/ajt.13897</a>                                 | Abstract only        |
| April 2020 | Automatic Classification of Ultrasound Screening Examinations of the Abdominal Aorta.                                                             | Morioka C.; Meng F.; Taira R.; Sayre J.; Zimmerman P.; Ishimitsu D.; Huang J.; Shen L.; El-Saden S. | 2016 | Journal of digital imaging                                                                    | 10.1007/s10278-016-9889-6                                                                                             | Similar study        |
| April 2020 | Pre-transplant bariatric surgery and one-year graft loss risk in kidney transplants                                                               | Mour G.; Zhang J.; Su Z.; Taber D.; Mauldin P.; Srinivas T.                                         | 2016 | American Journal of Transplantation                                                           | <a href="http://dx.doi.org/10.1111/ajt.13897">http://dx.doi.org/10.1111/ajt.13897</a>                                 | Non-cardiology focus |
| April 2020 | Development of a knowledge base to support the automatic classification of a computable ischemic stroke phenotype from electronic medical records | Mowery D.L.; Hill B.; Chapman W.W.; Cannon-Albright L.; Majersik J.J.                               | 2017 | Neurology: Genetics                                                                           | <a href="http://dx.doi.org/10.1212/NXG.00000000000000136">http://dx.doi.org/10.1212/NXG.00000000000000136</a>         | Abstract only        |

|            |                                                                                                                                           |                                                                                                                                                                                                                                                                                                                                                                              |      |                                                                                                                            |                               |                      |
|------------|-------------------------------------------------------------------------------------------------------------------------------------------|------------------------------------------------------------------------------------------------------------------------------------------------------------------------------------------------------------------------------------------------------------------------------------------------------------------------------------------------------------------------------|------|----------------------------------------------------------------------------------------------------------------------------|-------------------------------|----------------------|
| April 2020 | The Limb Leads ECG Signal Analysis in Inferior Myocardial Infarction Patients by Rule Base                                                | Muankid, A.; Ketcham, M.                                                                                                                                                                                                                                                                                                                                                     | 2018 | 2018 International Joint Symposium on Artificial Intelligence and Natural Language Processing, ISAI-NLP 2018 - Proceedings | 10.1109/ISAI-NLP.2018.8692998 | No NLP focus/details |
| April 2020 | GWAS and enrichment analyses of non-alcoholic fatty liver disease identify new trait-associated genes and pathways across eMERGE Network. | Namjou B.; Lingren T.; Huang Y.; Parameswaran S.; Cobb BL.; Stanaway IB.; Connolly JJ.; Mentch FD.; Benoit B.; Niu X.; Wei WQ.; Carroll RJ.; Pacheco JA.; Harley ITW.; Divanovic S.; Carrell DS.; Larson EB.; Carey DJ.; Verma S.; Ritchie MD.; Gharavi AG.; Murphy S.; Williams MS.; Crosslin DR.; Jarvik GP.; Kullo IJ.; Hakonarson H.; Li R.; ; Xanthakos SA.; Harley JB. | 2019 | BMC medicine                                                                                                               | 10.1186/s12916-019-1364-z     | Non-cardiology focus |
| April 2020 | A Natural Language Processing Tool for Large-Scale Data Extraction from Echocardiography Reports.                                         | Nath C.; Albaghdadi MS.; Jonnalagadda SR.                                                                                                                                                                                                                                                                                                                                    | 2016 | PLoS one                                                                                                                   | 10.1371/journal.pone.0153749  | Included             |
| April 2020 | Improving identification of patients at high-risk for readmission using socio-behavioral patient characteristics                          | Navathe A.S.; Zhong F.; Lei V.; Chang F.Y.; Rocha R.A.; Zhou L.                                                                                                                                                                                                                                                                                                              | 2016 | Journal of General Internal Medicine                                                                                       |                               | Non-cardiology focus |

|            |                                                                                                       |                                                                                                |      |                                                                                                       |                          |                      |
|------------|-------------------------------------------------------------------------------------------------------|------------------------------------------------------------------------------------------------|------|-------------------------------------------------------------------------------------------------------|--------------------------|----------------------|
| April 2020 | Hospital Readmission and Social Risk Factors Identified from Physician Notes.                         | Navathe AS.; Zhong F.; Lei VJ.; Chang FY.; Sordo M.; Topaz M.; Navathe SB.; Rocha RA.; Zhou L. | 2018 | Health services research                                                                              | 10.1111/1475-6773.12670  | Non-cardiology focus |
| April 2020 | Machine learning based improved automatic diagnosis of cardiac disorder                               | Neelesh Srivastava; Mansi Bhatnagar; Anjali Yadav; Malay Kishore Dutta; Carlos M Travieso      | 2019 | Proceedings of the 2nd International Conference on Applications of Intelligent Systems                | 10.1145/3309772.3309783  | No NLP focus/details |
| April 2020 | GPU-based Acceleration of Detailed Tissue-Scale Cardiac Simulations                                   | Neringa Altanaite; Johannes Langguth                                                           | 2018 | Proceedings of the 11th Workshop on General Purpose GPUs                                              | 10.1145/3180270.3180274  | No NLP focus/details |
| April 2020 | Closed-Loop Quantitative Verification of Rate-Adaptive Pacemakers                                     | Nicola Paoletti; Andrea Patanv®; Marta Kwiatkowska                                             | 2018 | ACM Trans. Cyber-Phys. Syst.                                                                          | 10.1145/3152767          | No NLP focus/details |
| April 2020 | How do Twitter, Wikipedia, and Harrison,Ãs principles of medicine describe heart attacks?             | Nikhil Devraj; Michael Chary                                                                   | 2015 | Proceedings of the 6th ACM Conference on Bioinformatics, Computational Biology and Health Informatics | 10.1145/2808719.2812591  | No NLP focus/details |
| April 2020 | Complex event recognition in the big data era                                                         | Nikos Giatrakos; Alexander Artikis; Antonios Deligiannakis; Minos Garofalakis                  | 2017 | Proc. VLDB Endow.                                                                                     | 10.14778/3137765.3137829 | Non-cardiology focus |
| April 2020 | Treatment of Neuroblastoma with an Engineered "Obligate" Anaerobic Salmonella typhimurium Strain YB1. | Ning BT.; Yu B.; Chan S.; Chan JL.; Huang JD.; Chan GC.                                        | 2017 | Journal of Cancer                                                                                     | 10.7150/jca.18776        | Non-cardiology focus |

|            |                                                                                                                                                                       |                                                                                                                                                         |      |                                                                                                    |                                                                                                       |                      |
|------------|-----------------------------------------------------------------------------------------------------------------------------------------------------------------------|---------------------------------------------------------------------------------------------------------------------------------------------------------|------|----------------------------------------------------------------------------------------------------|-------------------------------------------------------------------------------------------------------|----------------------|
| April 2020 | Limited alignment of publicly competitive disease funding with disease burden in Japan.                                                                               | Nomura S.; Yoneoka D.; Tanaka S.; Makuuchi R.; Sakamoto H.; Ishizuka A.; Nakamura H.; Kubota A.; Shibuya K.                                             | 2020 | PloS one                                                                                           | 10.1371/journal.pone.0228542                                                                          | Non-cardiology focus |
| April 2020 | Interim results on the relationship between mild-moderate and severe hypoglycaemia and cardiovascular disease in a cohort of sulfonylurea users                       | Nunes A.P.; Yang J.; Tunceli K.; Kurtyka K.; Radican L.; Engel S.S.; Yu S.; Doherty M.C.; Dore D.D.                                                     | 2015 | Diabetologia                                                                                       | <a href="http://dx.doi.org/10.1007/s00125-015-3687-4">http://dx.doi.org/10.1007/s00125-015-3687-4</a> | Abstract only        |
| April 2020 | A Framework for Enhancing the Query and Medical Record Representations for Patient Search                                                                             | Nut Limsopatham                                                                                                                                         | 2015 | SIGIR Forum                                                                                        | 10.1145/2795403.2795420                                                                               | Non-cardiology focus |
| April 2020 | Unsupervised Abbreviation Expansion in Clinical Narratives.                                                                                                           | Oleynik M.; Kreuzthaler M.; Schulz S.                                                                                                                   | 2017 | Studies in health technology and informatics                                                       |                                                                                                       | Non-cardiology focus |
| April 2020 | Design and Evaluation of a Person-Centric Heart Monitoring System over Fog Computing Infrastructure                                                                   | Orestis Akrivopoulos; Dimitrios Amaxilatis; Athanasios Antoniou; Ioannis Chatzigiannakis                                                                | 2017 | Proceedings of the First International Workshop on Human-centered Sensing, Networking, and Systems | 10.1145/3144730.3144736                                                                               | No NLP focus/details |
| April 2020 | Natural language processing identifies an association between Canadian cardiovascular society angina severity and mortality within the department of veterans affairs | Owlia M.; Dodson J.A.; DuVall S.L.; LaFleur J.; Patterson O.; Shah R.; Sedlis S.P.; Bress A.                                                            | 2017 | Circulation: Cardiovascular Quality and Outcomes                                                   |                                                                                                       | Abstract only        |
| April 2020 | Angina Severity, Mortality, and Healthcare Utilization Among Veterans With Stable Angina.                                                                             | Owlia M.; Dodson JA.; King JB.; Derington CG.; Herrick JS.; Sedlis SP.; Crook J.; DuVall SL.; LaFleur J.; Nelson R.; Patterson OV.; Shah RU.; Bress AP. | 2019 | Journal of the American Heart Association                                                          | 10.1161/JAHA.119.012811                                                                               | Included             |

|            |                                                                                                                      |                                                                                                         |      |                                                                                                             |                                                                                                       |                            |
|------------|----------------------------------------------------------------------------------------------------------------------|---------------------------------------------------------------------------------------------------------|------|-------------------------------------------------------------------------------------------------------------|-------------------------------------------------------------------------------------------------------|----------------------------|
| April 2020 | Automatically Structuring on Chinese Ultrasound Report of Cerebrovascular Diseases via Natural Language Processing   | P. Chen; Q. Liu; L. Wei; B. Zhao; Y. Jia; H. Lv; X. Fei                                                 | 2019 | IEEE Access                                                                                                 | 10.1109/ACCESS.2019.2923221                                                                           | Similar study              |
| April 2020 | Big Data: What Is It and What Does It Mean for Cardiovascular Research and Prevention Policy                         | Pah A.R.; Rasmussen-Torvik L.J.; Goel S.; Greenland P.; Kho A.N.                                        | 2015 | Current Cardiovascular Risk Reports                                                                         | <a href="http://dx.doi.org/10.1007/s12170-014-0424-3">http://dx.doi.org/10.1007/s12170-014-0424-3</a> | Review/perspective article |
| April 2020 | Using EHRs and Machine Learning for Heart Failure Survival Analysis.                                                 | Panahiazar M.; Taslimitehrani V.; Pereira N.; Pathak J.                                                 | 2015 | Studies in health technology and informatics                                                                |                                                                                                       | No NLP focus/details       |
| April 2020 | Upper gastrointestinal complications following ablation therapy for atrial fibrillation.                             | Park S.Y.; Camilleri M.; Packer D.; Monahan K.                                                          | 2017 | Neurogastroenterology and motility : the official journal of the European Gastrointestinal Motility Society | 10.1111/nmo.13109                                                                                     | Non-cardiology focus       |
| April 2020 | Development and Evaluation of a Case-Based Retrieval Service.                                                        | Pasche E.; Chinali M.; Gobeill J.; Ruch P.                                                              | 2017 | Studies in health technology and informatics                                                                |                                                                                                       | Non-cardiology focus       |
| April 2020 | Assessing Information Congruence of Documented Cardiovascular Disease between Electronic Dental and Medical Records. | Patel J.; Mowery D.; Krishnan A.; Thyvalikakath T.                                                      | 2018 | AMIA ... Annual Symposium proceedings. AMIA Symposium                                                       |                                                                                                       | Non-cardiology focus       |
| April 2020 | Developing an algorithm to curate a heart failure with preserved ejection fraction cohort in a large database        | Patel Y.R.; Robbins J.; Kurgansky K.; Gadiraju T.; Imran T.; Cho K.; Gagnon D.; Gaziano J.M.; Joseph J. | 2016 | Journal of the American College of Cardiology                                                               |                                                                                                       | Abstract only              |

|            |                                                                                                                         |                                                                                                                                                |      |                                                                                                     |                              |                      |
|------------|-------------------------------------------------------------------------------------------------------------------------|------------------------------------------------------------------------------------------------------------------------------------------------|------|-----------------------------------------------------------------------------------------------------|------------------------------|----------------------|
| April 2020 | Development and validation of a heart failure with preserved ejection fraction cohort using electronic medical records. | Patel YR.; Robbins JM.; Kurgansky KE.; Imran T.; Orkaby AR.; McLean RR.; Ho YL.; Cho K.; Michael Gaziano J.; Djousse L.; Gagnon DR.; Joseph J. | 2018 | BMC cardiovascular disorders                                                                        | 10.1186/s12872-018-0866-5    | Included             |
| April 2020 | Unlocking echocardiogram measurements for heart disease research through natural language processing.                   | Patterson OV.; Freiberg MS.; Skanderson M.; J Fodeh S.; Brandt CA.; DuVall SL.                                                                 | 2017 | BMC cardiovascular disorders                                                                        | 10.1186/s12872-017-0580-8    | Included             |
| April 2020 | Extraction of Vital Signs from Clinical Notes.                                                                          | Patterson OV.; Jones M.; Yao Y.; Viernes B.; Alba PR.; Iwashyna TJ.; DuVall SL.                                                                | 2015 | Studies in health technology and informatics                                                        |                              | Non-cardiology focus |
| April 2020 | The electronic health record as a catalyst for quality improvement in patient care.                                     | Payne TH.                                                                                                                                      | 2016 | Heart (British Cardiac Society)                                                                     | 10.1136/heartjnl-2015-308724 | Non-cardiology focus |
| April 2020 | Healthcare Sensor Data Management on the Cloud                                                                          | Pelagia Tsiachri Renta; Stelios Sotiriadis; Euripides G.M. Petrakis                                                                            | 2017 | Proceedings of the 2017 Workshop on Adaptive Resource Management and Scheduling for Cloud Computing | 10.1145/3110355.3110359      | Non-cardiology focus |
| April 2020 | Platelet to lymphocyte ratio and neutrophil to lymphocyte ratio in patients with rheumatoid arthritis.                  | Peng YF.; Cao L.; Zeng YH.; Zhang ZX.; Chen D.; Zhang Q.; Zhu YS.                                                                              | 2015 | Open medicine (Warsaw, Poland)                                                                      | 10.1515/med-2015-0037        | Non-cardiology focus |

|            |                                                                                                                                                                                      |                                                                                                                                                                                                                                                                      |      |                                                                                                                                                   |                                                                                                                           |                      |
|------------|--------------------------------------------------------------------------------------------------------------------------------------------------------------------------------------|----------------------------------------------------------------------------------------------------------------------------------------------------------------------------------------------------------------------------------------------------------------------|------|---------------------------------------------------------------------------------------------------------------------------------------------------|---------------------------------------------------------------------------------------------------------------------------|----------------------|
| April 2020 | The application of cognitive computing technology in genomics in precision oncological medicine: The Sistemas Genomicos Experience                                                   | Perez L.; Cantalapiedra D.; Valero-Hervas D.; Duran I.; Calvete O.; Wang C.-K.; Martinez-Laperche C.; Gonzalez-Neira A.; Felipe-Ponce V.; Olmo S.L.; Garcia J.; Mico C.C.; Pedrosa V.F.; Minambres R.; Buno Borde I.; Santillan S.; Urman A.; Saiz F.J.S.; Moya C.M. | 2018 | Journal of Clinical Oncology                                                                                                                      | <a href="http://dx.doi.org/10.1200/JCO.2018.36.15-suppl.e18544">http://dx.doi.org/10.1200/JCO.2018.36.15-suppl.e18544</a> | Non-cardiology focus |
| April 2020 | A picture,Ãs meaning: The design and evaluation of pictographs illustrating patient discharge instructions                                                                           | Perri, S.; Argo, L.; Kuang, J.; Bui, D.; Hill, B.; Bray, B.; Treitler-Zeng, Q.                                                                                                                                                                                       | 2015 | Journal of Communication in Healthcare                                                                                                            | 10.1080/17538068.2016.1145877                                                                                             | No NLP focus/details |
| April 2020 | Home Health Care: Nurse-Physician Communication, Patient Severity, and Hospital Readmission.                                                                                         | Pesko MF.; Gerber LM.; Peng TR.; Press MJ.                                                                                                                                                                                                                           | 2018 | Health services research                                                                                                                          | 10.1111/1475-6773.12667                                                                                                   | Non-cardiology focus |
| April 2020 | Can Alexa, Cortana, Google Assistant and Siri save your life? A mixed-methods analysis of virtual digital assistants and their responses to first aid and basic life support queries | Picard C.; Smith K.E.; Picard K.; Douma M.J.                                                                                                                                                                                                                         | 2020 | BMJ Innovations                                                                                                                                   | <a href="http://dx.doi.org/10.1136/bmjinnov-2018-000326">http://dx.doi.org/10.1136/bmjinnov-2018-000326</a>               | No NLP focus/details |
| April 2020 | Can donor narratives yield insights? A natural language processing proof of concept to facilitate kidney allocation                                                                  | Placona A.M.; Martinez C.; McGehee H.; Carrico B.; Klassen D.K.; Stewart D.                                                                                                                                                                                          | 2019 | American Journal of Transplantation                                                                                                               | <a href="http://dx.doi.org/10.1111/ajt.15705">http://dx.doi.org/10.1111/ajt.15705</a>                                     | Non-cardiology focus |
| April 2020 | Can donor narratives yield insights? A natural language processing proof of concept to facilitate kidney allocation.                                                                 | Placona AM.; Martinez C.; McGehee H.; Carrico B.; Klassen DK.; Stewart D.                                                                                                                                                                                            | 2020 | American journal of transplantation : official journal of the American Society of Transplantation and the American Society of Transplant Surgeons | 10.1111/ajt.15705                                                                                                         | Duplicate            |

|            |                                                                                                                               |                                                                                                                                                                                                                                                                                                                                                     |      |                                                                                                  |                              |                      |
|------------|-------------------------------------------------------------------------------------------------------------------------------|-----------------------------------------------------------------------------------------------------------------------------------------------------------------------------------------------------------------------------------------------------------------------------------------------------------------------------------------------------|------|--------------------------------------------------------------------------------------------------|------------------------------|----------------------|
| April 2020 | Evaluating the Portability of an {NLP} System for Processing Echocardiograms: A Retrospective, Multi-site Observational Study | Prakash Adekkanattu and; Guoqian Jiang and; Yuan Luo and; Paul R. Kingsbury and; Zhenxing Xu and; Luke V. Rasmussen and; Jennifer A. Pacheco and; Richard C. Kiefer and; Daniel J. Stone and; Pascal S. Brandt and; Liang Yao and; Yizhen Zhong and; Yu Deng and; Fei Wang and; Jessica S. Ancker and; Thomas R. Campion Jr. and; Jyotishman Pathak | 2019 | arXiv pre-print                                                                                  |                              | Included             |
| April 2020 | Medical instructional media in human body systems using 3D projection mapping                                                 | Pramkeaw, P.                                                                                                                                                                                                                                                                                                                                        | 2018 | Advances in Intelligent Systems and Computing                                                    | 10.1007/978-3-319-70016-8_20 | Non-cardiology focus |
| April 2020 | Postdischarge Communication Between Home Health Nurses and Physicians: Measurement, Quality, and Outcomes.                    | Press MJ.; Gerber LM.; Peng TR.; Pesko MF.; Feldman PH.; Ouchida K.; Sridharan S.; Bao Y.; Barron Y.; Casalino LP.                                                                                                                                                                                                                                  | 2015 | Journal of the American Geriatrics Society                                                       | 10.1111/jgs.13491            | Non-cardiology focus |
| April 2020 | Relevance of Participatory Approaches in Creating ICT Systems for Public Health Programmes                                    | Priyanka Ivatury; Angel Jeena; Amit Prakash                                                                                                                                                                                                                                                                                                         | 2017 | Proceedings of the 10th International Conference on Theory and Practice of Electronic Governance | 10.1145/3047273.3047370      | Non-cardiology focus |



|            |                                                                                                                                                            |                                                                                              |      |                                                                                                                                     |                                 |                            |
|------------|------------------------------------------------------------------------------------------------------------------------------------------------------------|----------------------------------------------------------------------------------------------|------|-------------------------------------------------------------------------------------------------------------------------------------|---------------------------------|----------------------------|
| April 2020 | A rhythm analysis-based model to predict sedentary behaviors                                                                                               | Qian He; Emmanuel O. Agu                                                                     | 2017 | Proceedings of the Second IEEE/ACM International Conference on Connected Health: Applications, Systems and Engineering Technologies | 10.1109/chase.2017.122          | No NLP focus/details       |
| April 2020 | Two Case Studies of Experience Prototyping Machine Learning Systems in the Wild                                                                            | Qian Yang                                                                                    | 2019 | arXiv pre-print                                                                                                                     |                                 | Non-cardiology focus       |
| April 2020 | Classification Techniques Used in Sentiment Analysis & Prediction of Heart Disease using Data Mining Techniques: Review                                    | Rahul; H. Bansal; Monika                                                                     | 2019 | 2019 International Conference on Issues and Challenges in Intelligent Computing Techniques (ICICT)                                  | 10.1109/ICICT46931.2019.8977707 | Review/perspective article |
| April 2020 | Modular quantitative monitoring                                                                                                                            | Rajeev Alur; Konstantinos Mamouras; Caleb Stanford                                           | 2019 | Proc. ACM Program. Lang.                                                                                                            | 10.1145/3290363                 | No NLP focus/details       |
| April 2020 | Recorded poor insight as a predictor of service use outcomes: cohort study of patients with first-episode psychosis in a large mental healthcare database. | Ramu N.; Kolliakou A.; Sanyal J.; Patel R.; Stewart R.                                       | 2019 | BMJ open                                                                                                                            | 10.1136/bmjopen-2019-028929     | Non-cardiology focus       |
| April 2020 | Got Flow? Using Machine Learning on Physiological Data to Classify Flow                                                                                    | Raphael Rissler; Mario Nadj; Maximilian Xiling Li; Michael Thomas Knierim; Alexander Maedche | 2018 | Extended Abstracts of the 2018 CHI Conference on Human Factors in Computing Systems                                                 | 10.1145/3170427.3188480         | No NLP focus/details       |

|            |                                                                                                                                                                                     |                                                                                                                                                                      |      |                                                                                                                       |                                                                                                           |                      |
|------------|-------------------------------------------------------------------------------------------------------------------------------------------------------------------------------------|----------------------------------------------------------------------------------------------------------------------------------------------------------------------|------|-----------------------------------------------------------------------------------------------------------------------|-----------------------------------------------------------------------------------------------------------|----------------------|
| April 2020 | Cognitive imaging: Using knowledge representation for reliable segmentation of MR angiography data                                                                                  | Rayz, J.T.; Rayz, V.L.; Raskin, V.                                                                                                                                   | 2017 | Proceedings of 2017 IEEE 16th International Conference on Cognitive Informatics and Cognitive Computing, ICCI*CC 2017 | 10.1109/ICCI-CC.2017.8109727                                                                              | No NLP focus/details |
| April 2020 | PMU120 CRITICAL REVIEW OF VALIDATION STUDIES OF NATURAL LANGUAGE PROCESSING TECHNIQUES APPLIED TO INFORMATION FROM ELECTRONIC MEDICAL RECORDS DURING THE LAST 5 YEARS               | Rebollo P.; Celik H.; Cerezales M.; Wilke T.                                                                                                                         | 2019 | Value in Health                                                                                                       | <a href="http://dx.doi.org/10.1016/j.jval.2019.09.1738">http://dx.doi.org/10.1016/j.jval.2019.09.1738</a> | Abstract only        |
| April 2020 | Determinants of Smoking and Quitting in HIV-Infected Individuals.                                                                                                                   | Regan S.; Meigs JB.; Grinspoon SK.; Triant VA.                                                                                                                       | 2016 | PloS one                                                                                                              | 10.1371/journal.pone.0153103                                                                              | Non-cardiology focus |
| April 2020 | Adverse Drug Reaction Detection in Social Media by Deepm Learning Methods.                                                                                                          | Rezaei Z.; Ebrahimpour-Komleh H.; Eslami B.; Chavoshinejad R.; Totonchi M.                                                                                           | 2020 | Cell journal                                                                                                          | 10.22074/cellj.2020.6615                                                                                  | Non-cardiology focus |
| April 2020 | Deep Learning Approaches Outperform Conventional Strategies in De-Identification of German Medical Reports.                                                                         | Richter-Pechanski P.; Amr A.; Katus HA.; Dieterich C.                                                                                                                | 2019 | Studies in health technology and informatics                                                                          | 10.3233/SHT1190813                                                                                        | Non-cardiology focus |
| April 2020 | De-Identification of German Medical Admission Notes.                                                                                                                                | Richter-Pechanski P.; Riezler S.; Dieterich C.                                                                                                                       | 2018 | Studies in health technology and informatics                                                                          |                                                                                                           | Non-cardiology focus |
| April 2020 | Differences in statin utilization and lipid lowering by race, ethnicity, and HIV status in a real-world cohort of persons with human immunodeficiency virus and uninfected persons. | Riesterberg RA.; Furman A.; Cowen A.; Pawlowksi A.; Schneider D.; Lewis AA.; Kelly S.; Taiwo B.; Achenbach C.; Palella F.; Stone NJ.; Lloyd-Jones DM.; Feinstein MJ. | 2019 | American heart journal                                                                                                | 10.1016/j.ahj.2018.11.012                                                                                 | No NLP focus/details |

|            |                                                                                                                                   |                                                                                                               |      |                                                                                           |                                                                                                       |                      |
|------------|-----------------------------------------------------------------------------------------------------------------------------------|---------------------------------------------------------------------------------------------------------------|------|-------------------------------------------------------------------------------------------|-------------------------------------------------------------------------------------------------------|----------------------|
| April 2020 | The role of fine-grained annotations in supervised recognition of risk factors for heart disease from EHRs                        | Roberts K.; Shooshan S.E.; Rodriguez L.; Abhyankar S.; Kilicoglu H.; Demner-Fushman D.                        | 2015 | Journal of Biomedical Informatics                                                         | <a href="http://dx.doi.org/10.1016/j.jbi.2015.06.010">http://dx.doi.org/10.1016/j.jbi.2015.06.010</a> | Non-cardiology focus |
| April 2020 | The role of fine-grained annotations in supervised recognition of risk factors for heart disease from EHRs.                       | Roberts K.; Shooshan SE.; Rodriguez L.; Abhyankar S.; Kilicoglu H.; Demner-Fushman D.                         | 2015 | Journal of biomedical informatics                                                         | 10.1016/j.jbi.2015.06.010                                                                             | Duplicate            |
| April 2020 | Effects of Different Periodization Strategies of Combined Aerobic and Strength Training on Heart Rate Variability in Older Women. | Rodrigues JAL.; Santos BC.; Medeiros LH.; Gonv̂alves TCP.; JV̂nior CRB.                                       | 2019 | Journal of strength and conditioning research                                             | 10.1519/JSC.0000000000003013                                                                          | No NLP focus/details |
| April 2020 | Secure NoSQL Based Medical Data Processing and Retrieval: The Exposome Project                                                    | Roshan Ramprasad Shetty; Akalanka Mailewa Dissanayaka; Susan Mengel; Lisa Gittner; Ravi Vadapalli; Hafiz Khan | 2017 | Companion Proceedings of the 10th International Conference on Utility and Cloud Computing | 10.1145/3147234.3148132                                                                               | Non-cardiology focus |

|            |                                                                                                                        |                                                                                                                                                                              |      |                                                                                                                                                                                                                                                                          |                                 |                         |
|------------|------------------------------------------------------------------------------------------------------------------------|------------------------------------------------------------------------------------------------------------------------------------------------------------------------------|------|--------------------------------------------------------------------------------------------------------------------------------------------------------------------------------------------------------------------------------------------------------------------------|---------------------------------|-------------------------|
| April 2020 | Personalized and automated remote monitoring of atrial fibrillation.                                                   | Rosier A.; Mabo P.;<br>Temal L.; Van Hille P.;<br>Dameron O.; DelV@ger<br>L.; Grouin C.;<br>Zweigenbaum P.;<br>Jacques J.; Chazard E.;<br>Laporte L.; Henry C.;<br>Burgun A. | 2016 | Europace :<br>European<br>pacing,<br>arrhythmias,<br>and cardiac<br>electrophysio<br>logy : journal of<br>the working<br>groups on<br>cardiac pacing,<br>arrhythmias,<br>and cardiac<br>cellular<br>electrophysio<br>logy of the<br>European<br>Society of<br>Cardiology | 10.1093/europ<br>ace/euv234     | Included                |
| April 2020 | Remote Monitoring of Cardiac Implantable Devices: Ontology Driven Classification of the Alerts.                        | Rosier A.; Mabo P.;<br>Temal L.; Van Hille P.;<br>Dameron O.; Deleger L.;<br>Grouin C.; Zweigenbaum<br>P.; Jacques J.; Chazard<br>E.; Laporte L.; Henry C.;<br>Burgun A.     | 2016 | Studies in<br>health<br>technology and<br>informatics                                                                                                                                                                                                                    |                                 | Similar study           |
| April 2020 | Exploring identifiers of research articles related to food and disease using artificial intelligence                   | Ross, M.; Mahmoud,<br>E.S.; Abdel-Aal, E.-S.M.                                                                                                                               | 2018 | International<br>Journal of<br>Advanced<br>Computer<br>Science and<br>Applications                                                                                                                                                                                       | 10.14569/IJACS<br>A.2018.091101 | Non-cardiology<br>focus |
| April 2020 | Non-redundant association rules between diseases and medications: an automated method for knowledge base construction. | Sv@verac F.; Sauleau EA.<br>Meyer N.; Lefv@vre H.;<br>Nisand G.; Jay N.                                                                                                      | 2015 | BMC medical<br>informatics and<br>decision making                                                                                                                                                                                                                        | 10.1186/s1291<br>1-015-0151-9   | Non-cardiology<br>focus |

|            |                                                                                                                                 |                                                                                         |      |                                                                                                                                                                                        |                                  |                      |
|------------|---------------------------------------------------------------------------------------------------------------------------------|-----------------------------------------------------------------------------------------|------|----------------------------------------------------------------------------------------------------------------------------------------------------------------------------------------|----------------------------------|----------------------|
| April 2020 | Prediction of venous thromboembolism using semantic and sentiment analyses of clinical narratives.                              | Sabra S.; Mahmood Malik K.; Alobaidi M.                                                 | 2018 | Computers in biology and medicine                                                                                                                                                      | 10.1016/j.compbiomed.2017.12.026 | Non-cardiology focus |
| April 2020 | A preliminary investigation with twitter to augment CVD exposome research                                                       | Sada, D.M.; Mengel, S.; Gittner, L.S.; Khan, H.; Pitalua Rodriguez, M.A.; Vadapalli, R. | 2017 | BDCAT 2017 - Proceedings of the 4th IEEE/ACM International Conference on Big Data Computing, Applications and Technologies                                                             | 10.1145/3148055.3148074          | No NLP focus/details |
| April 2020 | Towards circadian computing: a sensing & intervention framework for BodyClock friendly technology                               | Saeed Abdullah                                                                          | 2015 | Adjunct Proceedings of the 2015 ACM International Joint Conference on Pervasive and Ubiquitous Computing and Proceedings of the 2015 ACM International Symposium on Wearable Computers | 10.1145/2800835.2801657          | Non-cardiology focus |
| April 2020 | Implementation of the algorithms of ECG signal processing on embedded architectures: a survey                                   | Safa Mejhoudi; Rachid Latif; Ahmed Toumanari; Abdehafid Elouardi; Wissam Jenkal         | 2017 | Proceedings of the Mediterranean Symposium on Smart City Application                                                                                                                   | 10.1145/3175628.3175632          | No NLP focus/details |
| April 2020 | Complex analyses on clinical information systems using restricted natural language querying to resolve time-event dependencies. | Safari L.; Patrick JD.                                                                  | 2018 | Journal of biomedical informatics                                                                                                                                                      | 10.1016/j.jbi.2018.04.004        | Non-cardiology focus |

|            |                                                                                                                                                  |                                                                      |      |                                                                                                   |                                                                                                       |                      |
|------------|--------------------------------------------------------------------------------------------------------------------------------------------------|----------------------------------------------------------------------|------|---------------------------------------------------------------------------------------------------|-------------------------------------------------------------------------------------------------------|----------------------|
| April 2020 | Rapid identification of familial hypercholesterolemia from electronic health records                                                             | Safarova M.S.; Liu H.; Kullo I.J.                                    | 2015 | Circulation                                                                                       |                                                                                                       | Included             |
| April 2020 | Rapid identification of familial hypercholesterolemia from electronic health records: The SEARCH study.                                          | Safarova MS.; Liu H.; Kullo IJ.                                      |      | Journal of clinical lipidology                                                                    | 10.1016/j.jacl.2016.08.001                                                                            | Duplicate            |
| April 2020 | ADDHard: Arrhythmia Detection with Digital Hardware by Learning ECG Signal                                                                       | Sai Manoj Pudukotai Dinakarrao; Axel Jantsch                         | 2018 | Proceedings of the 2018 on Great Lakes Symposium on VLSI                                          | 10.1145/3194554.3194647                                                                               | No NLP focus/details |
| April 2020 | Sketch-based Registration of 3D Cine MRI to 4D flow MRI                                                                                          | Samin Sabokrohiyeh; Kathleen Ang; Mohammed Elbaz; Faramarz Samavati  | 2019 | Proceedings of the 2019 11th International Conference on Bioinformatics and Biomedical Technology | 10.1145/3340074.3340094                                                                               | No NLP focus/details |
| April 2020 | Simulation modelling for the implementation appraisal of cardiovascular device implants                                                          | Samuel Omoniyi; Navonil Mustafee; Andi Smart                         | 2018 | Proceedings of the 2018 Winter Simulation Conference                                              |                                                                                                       | No NLP focus/details |
| April 2020 | Identification of patients with ventilator associated pneumonia using clinicaltime, a temporal abstractions and temporal pattern matching system | Santa Maria J.; Gomez I.; Daza C.; Trincado J.; Barbe M.; Capurro D. | 2016 | European Journal of Epidemiology                                                                  | <a href="http://dx.doi.org/10.1007/s10654-016-0183-1">http://dx.doi.org/10.1007/s10654-016-0183-1</a> | Non-cardiology focus |
| April 2020 | Mapping Clinical Practice Guidelines to SWRL Rules                                                                                               | Sbissi, S.; Mahfoudh, M.; Gattoufi, S.                               | 2019 | Advances in Intelligent Systems and Computing                                                     | 10.1007/978-3-030-16181-1_27                                                                          | Non-cardiology focus |
| April 2020 | Assigning clinical codes with data-driven concept representation on Dutch clinical free text.                                                    | Scheurwegs E.; Luyckx K.; Luyten L.; Goethals B.; Daelemans W.       | 2017 | Journal of biomedical informatics                                                                 | 10.1016/j.jbi.2017.04.007                                                                             | Non-cardiology focus |

|            |                                                                                                                                                |                                                                                               |      |                                                                                                                 |                                                                                                                     |                      |
|------------|------------------------------------------------------------------------------------------------------------------------------------------------|-----------------------------------------------------------------------------------------------|------|-----------------------------------------------------------------------------------------------------------------|---------------------------------------------------------------------------------------------------------------------|----------------------|
| April 2020 | Comprehensive patient-specific information preprocessing for cardiac surgery simulations.                                                      | Schoch N.; Kivüler F.; Stoll M.; Engelhardt S.; de Simone R.; Wolf I.; Bendl R.; Heuveline V. | 2016 | International journal of computer assisted radiology and surgery                                                | 10.1007/s11548-016-1397-0                                                                                           | No NLP focus/details |
| April 2020 | The Relational Way To Dam The Flood Of Genome Data                                                                                             | Sebastian Dorok                                                                               | 2015 | Proceedings of the 2015 ACM SIGMOD on PhD Symposium                                                             | 10.1145/2744680.2744692                                                                                             | Non-cardiology focus |
| April 2020 | SemNet: Using Local Features to Navigate the Biomedical Concept Graph.                                                                         | Sedler AR.; Mitchell CS.                                                                      | 2019 | Frontiers in bioengineering and biotechnology                                                                   | 10.3389/fbioe.2019.00156                                                                                            | Non-cardiology focus |
| April 2020 | Test battery for assessment of cognitive function in older employees: performance, brain processes, and cardiovascular costs                   | Sergei A. Schapkin; Xenija Weiübecker-Klaus                                                   | 2015 | Proceedings of the 8th ACM International Conference on Pervasive Technologies Related to Assistive Environments | 10.1145/2769493.2769553                                                                                             | No NLP focus/details |
| April 2020 | Natural language processing for disease phenotyping in UK primary care records for research: a pilot study in myocardial infarction and death. | Shah AD.; Bailey E.; Williams T.; Denaxas S.; Dobson R.; Hemingway H.                         | 2019 | Journal of biomedical semantics                                                                                 | 10.1186/s13326-019-0214-4                                                                                           | Included             |
| April 2020 | Frailty and cardiovascular surgery, deep neural network versus support vector machine to predict death                                         | Shah R.; Shao Y.; Doing-Harris K.; Weir C.; Cheng Y.; Bray B.; Zeng Q.                        | 2018 | Journal of the American College of Cardiology                                                                   | <a href="http://dx.doi.org/10.1016/S0735-1097(2018)931898-9">http://dx.doi.org/10.1016/S0735-1097(2018)931898-9</a> | Abstract only        |

|            |                                                                                                                                       |                                                                                                                   |      |                                                                                                                                      |                              |                            |
|------------|---------------------------------------------------------------------------------------------------------------------------------------|-------------------------------------------------------------------------------------------------------------------|------|--------------------------------------------------------------------------------------------------------------------------------------|------------------------------|----------------------------|
| April 2020 | Impact of Different Electronic Cohort Definitions to Identify Patients With Atrial Fibrillation From the Electronic Medical Record.   | Shah RU.; Mukherjee R.; Zhang Y.; Jones AE.; Springer J.; Hackett I.; Steinberg BA.; Lloyd-Jones DM.; Chapman WW. | 2020 | Journal of the American Heart Association                                                                                            | 10.1161/JAHA.119.014527      | Included                   |
| April 2020 | ECG sonification: a new approach for diagnosis of cardiac pathologies                                                                 | Shaid Hasan; Iqbal Kabir; Pratic A Muntakim                                                                       | 2019 | Proceedings of the 6th International Conference on Networking, Systems and Security                                                  | 10.1145/3362966.3362968      | No NLP focus/details       |
| April 2020 | Phenotypic clusters derived from clinical notes of patients with respiratory failure                                                  | Sharma B.; Dligach D.; Joyce C.; Littleton S.W.; Afshar M.                                                        | 2019 | American Journal of Respiratory and Critical Care Medicine                                                                           |                              | Non-cardiology focus       |
| April 2020 | Natural Language Processing of Clinical Notes on Chronic Diseases: Systematic Review.                                                 | Sheikhalishahi S.; Miotto R.; Dudley JT.; Lavelli A.; Rinaldi F.; Osmani V.                                       | 2019 | JMIR medical informatics                                                                                                             | 10.2196/12239                | Review/perspective article |
| April 2020 | Automatic knowledge extraction and data mining from echo reports of pediatric heart disease: Application on clinical decision support | Shi, Y.; Li, Z.; Jia, Z.; Hu, B.; Ju, M.; Zhang, X.; Li, H.                                                       | 2015 | Lecture Notes in Computer Science (including subseries Lecture Notes in Artificial Intelligence and Lecture Notes in Bioinformatics) | 10.1007/978-3-319-25816-4_34 | Included                   |



|            |                                                                                                           |                                                                                                                                                       |      |                                                                                                    |                                                                                                                 |                      |
|------------|-----------------------------------------------------------------------------------------------------------|-------------------------------------------------------------------------------------------------------------------------------------------------------|------|----------------------------------------------------------------------------------------------------|-----------------------------------------------------------------------------------------------------------------|----------------------|
| April 2020 | Automatic data source identification for clinical trial eligibility criteria resolution.                  | Shivade C.; Hebert C.; Regan K.; Fosler-Lussier E.; Lai AM.                                                                                           | 2016 | AMIA ... Annual Symposium proceedings. AMIA Symposium                                              |                                                                                                                 | Non-cardiology focus |
| April 2020 | Comparison of UMLS terminologies to identify risk of heart disease using clinical notes                   | Shivade C.; Malewadkar P.; Fosler-Lussier E.; Lai A.M.                                                                                                | 2015 | Journal of Biomedical Informatics                                                                  | <a href="http://dx.doi.org/10.1016/j.jbi.2015.08.025">http://dx.doi.org/10.1016/j.jbi.2015.08.025</a>           | Non-cardiology focus |
| April 2020 | Comparison of UMLS terminologies to identify risk of heart disease using clinical notes.                  | Shivade C.; Malewadkar P.; Fosler-Lussier E.; Lai AM.                                                                                                 | 2015 | Journal of biomedical informatics                                                                  | 10.1016/j.jbi.2015.08.025                                                                                       | Duplicate            |
| April 2020 | Imaging heart failure with artificial intelligence improving the realism of synthetic wisdom              | Shrestha S.; Sengupta P.P.                                                                                                                            | 2018 | Circulation: Cardiovascular Imaging                                                                | <a href="http://dx.doi.org/10.1161/CIRCIMAGING.118.007723">http://dx.doi.org/10.1161/CIRCIMAGING.118.007723</a> | No NLP focus/details |
| April 2020 | Novel Statistical Post Processing to Improve Blood Pressure Estimation from Smartphone Photoplethysmogram | Shreyasi Datta; Anirban Dutta Choudhury; Arijit Chowdhury; Tanushree Banerjee; Rohan Banerjee; Sakyajit Bhattacharya; Arpan Pal; Kayapanda M. Mandana | 2017 | Proceedings of the First International Workshop on Human-centered Sensing, Networking, and Systems | 10.1145/3144730.3144737                                                                                         | No NLP focus/details |
| April 2020 | SRCNN: Cardiovascular Vulnerable Plaque Recognition with Salient Region Proposal Networks                 | Sijie Liu; Yangyang Deng; Jingmin Xin; Weiliang Zuo; Peiwen Shi; Nanning Zheng                                                                        | 2018 | Proceedings of the 2nd International Conference on Graphics and Signal Processing                  | 10.1145/3282286.3282297                                                                                         | No NLP focus/details |
| April 2020 | A Baseline Patient Model to Support Testing of Medical Cyber-Physical Systems.                            | Silva LC.; Perkusich M.; Almeida HO.; Perkusich A.; Lima MA.; GorgVñnio KC.                                                                           | 2015 | Studies in health technology and informatics                                                       |                                                                                                                 | No NLP focus/details |

|            |                                                                                                                                                                              |                                                                                                                                                                                                                                                          |      |                                                                                           |                                                                                                               |                      |
|------------|------------------------------------------------------------------------------------------------------------------------------------------------------------------------------|----------------------------------------------------------------------------------------------------------------------------------------------------------------------------------------------------------------------------------------------------------|------|-------------------------------------------------------------------------------------------|---------------------------------------------------------------------------------------------------------------|----------------------|
| April 2020 | In reply                                                                                                                                                                     | Sinnenberg L.; Asch D.A.; Merchant R.M.                                                                                                                                                                                                                  | 2017 | JAMA<br>Cardiology                                                                        | <a href="http://dx.doi.org/10.1001/jama.cardio.2017.0197">http://dx.doi.org/10.1001/jama.cardio.2017.0197</a> | No NLP focus/details |
| April 2020 | Multiple novel plasma biomarkers are associated with aortic stenosis                                                                                                         | Small A.; Kiss D.; Chirinos J.; Damrauer S.; Giri J.; Guerraty M.; Ferrari G.; Rader D.                                                                                                                                                                  | 2016 | Circulation                                                                               |                                                                                                               | Abstract only        |
| April 2020 | FIB-4 stage of liver fibrosis is associated with incident heart failure with preserved, but not reduced, ejection fraction among people with and without HIV or hepatitis C. | So-Armah KA.; Lim JK.; Re VL.; Tate JP.; Chang CH.; Butt AA.; Gibert CL.; Rimland D.; Marconi VC.; Goetz MB.; Ramachandran V.; Brittain E.; Long M.; Nguyen KL.; Rodriguez-Barradas MC.; Budoff MJ.; Tindle HA.; Samet JH.; Justice AC.; Freiberg MS.; . | 2020 | Progress in cardiovascular diseases                                                       | <a href="http://dx.doi.org/10.1016/j.pcad.2020.02.010">10.1016/j.pcad.2020.02.010</a>                         | No NLP focus/details |
| April 2020 | Novel machine learning and statistical learning approaches in neurology                                                                                                      | Sokolowska B.                                                                                                                                                                                                                                            | 2018 | Folia Neuropathologica                                                                    | <a href="http://dx.doi.org/10.5114/fn.2018.78705">http://dx.doi.org/10.5114/fn.2018.78705</a>                 | Non-cardiology focus |
| April 2020 | Deep learning to convert unstructured CT pulmonary angiography reports into structured reports.                                                                              | Spandorfer A.; Branch C.; Sharma P.; Sahbaee P.; Schoepf UJ.; Ravenel JG.; Nance JW.                                                                                                                                                                     | 2019 | European radiology experimental                                                           | <a href="http://dx.doi.org/10.1186/s41747-019-0118-1">10.1186/s41747-019-0118-1</a>                           | Non-cardiology focus |
| April 2020 | Correction of Aliasing in Color Doppler Echocardiography Based on Image Processing Technique in Echodynamography                                                             | Sri Oktamuliani; Kaoru Hasegawa; Yoshifumi Saijo                                                                                                                                                                                                         | 2018 | Proceedings of the 3rd International Conference on Biomedical Signal and Image Processing | <a href="http://dx.doi.org/10.1145/327829.3278233">10.1145/327829.3278233</a>                                 | No NLP focus/details |

|            |                                                                                                                                                                           |                                                                                                                      |      |                                                                                                    |                                                                                                                       |                            |
|------------|---------------------------------------------------------------------------------------------------------------------------------------------------------------------------|----------------------------------------------------------------------------------------------------------------------|------|----------------------------------------------------------------------------------------------------|-----------------------------------------------------------------------------------------------------------------------|----------------------------|
| April 2020 | Big data predictive solution to optimize kidney transplant outcome and resource utilization                                                                               | Srinivas T.; Northrup D.; Mauldin P.; Taber D.; Su Z.; Zhang J.; Daniels M.; Moran W.                                | 2016 | American Journal of Transplantation                                                                | <a href="http://dx.doi.org/10.1111/ajt.13897">http://dx.doi.org/10.1111/ajt.13897</a>                                 | Non-cardiology focus       |
| April 2020 | One-year graft loss risk in kidney transplants-a big data approach                                                                                                        | Srinivas T.; Taber D.; Zhang J.; Su Z.; Marsden J.; Tripathi A.; Moran W.; Mauldin P.                                | 2016 | American Journal of Transplantation                                                                | <a href="http://dx.doi.org/10.1111/ajt.13898">http://dx.doi.org/10.1111/ajt.13898</a>                                 | Non-cardiology focus       |
| April 2020 | A big data approach to prediction of three-year graft loss risk in kidney transplants: Structured and unstructured dynamic patient level data improve predictive efficacy | Srinivas T.; Zhang J.; Su Z.; Marsden J.; Anwar H.; Tripathy A.; Taber D.; Moran W.; Mauldin P.                      | 2016 | Transplantation                                                                                    | <a href="http://dx.doi.org/10.1097/01.tp.0000490147.72544.1a">http://dx.doi.org/10.1097/01.tp.0000490147.72544.1a</a> | Non-cardiology focus       |
| April 2020 | Three-year graft loss risk in kidney transplants: Dynamic patient level data improve predictive efficacy                                                                  | Srinivas T.; Zhang J.; Su Z.; Taber D.; Marsden J.; Reilly K.; Northrup D.; Long J.; Lenert L.; Moran W.; Mauldin P. | 2016 | American Journal of Transplantation                                                                | <a href="http://dx.doi.org/10.1111/ajt.13897">http://dx.doi.org/10.1111/ajt.13897</a>                                 | Non-cardiology focus       |
| April 2020 | Early Prediction of Cardiac Arrest (Code Blue) using Electronic Medical Records                                                                                           | Sriram Somanchi; Samrachana Adhikari; Allen Lin; Elena Eneva; Rayid Ghani                                            | 2015 | Proceedings of the 21th ACM SIGKDD International Conference on Knowledge Discovery and Data Mining | 10.1145/2783258.2788588                                                                                               | No NLP focus/details       |
| April 2020 | A Taxonomy on Machine Learning Based Techniques to Identify the Heart Disease                                                                                             | Srivastava, A.K.; Singh, P.K.; Kumar, Y.                                                                             | 2019 | Communications in Computer and Information Science                                                 | 10.1007/978-981-15-1718-1_2                                                                                           | Review/perspective article |
| April 2020 | Natural language processing methods enhance mace identification from electronic health records                                                                            | St Laurent S.; Guo M.; Alfonso R.; Okoro T.; Johansen K.; Dember L.; Lindsay A.                                      | 2018 | Value in Health                                                                                    |                                                                                                                       | Abstract only              |

|            |                                                                                                                             |                                                                                                                                                                                                       |      |                                                                                                                 |                                                                                                       |                      |
|------------|-----------------------------------------------------------------------------------------------------------------------------|-------------------------------------------------------------------------------------------------------------------------------------------------------------------------------------------------------|------|-----------------------------------------------------------------------------------------------------------------|-------------------------------------------------------------------------------------------------------|----------------------|
| April 2020 | Identifying risk factors for heart disease over time: Overview of 2014 i2b2/UTHealth shared task Track 2.                   | Stubbs A.; Kotfila C.; Xu H.; Uzuner vñ.                                                                                                                                                              | 2015 | Journal of biomedical informatics                                                                               | 10.1016/j.jbi.2015.07.001                                                                             | Duplicate            |
| April 2020 | Identifying risk factors for heart disease over time: Overview of 2014 i2b2/UTHealth shared task Track 2                    | Stubbs A.; Kotfila C.; Xu H.; Uzuner O.                                                                                                                                                               | 2015 | Journal of Biomedical Informatics                                                                               | <a href="http://dx.doi.org/10.1016/j.jbi.2015.07.001">http://dx.doi.org/10.1016/j.jbi.2015.07.001</a> | Non-cardiology focus |
| April 2020 | Annotating risk factors for heart disease in clinical narratives for diabetic patients.                                     | Stubbs A.; Uzuner vñ.                                                                                                                                                                                 | 2015 | Journal of biomedical informatics                                                                               | 10.1016/j.jbi.2015.05.009                                                                             | Non-cardiology focus |
| April 2020 | Annotating risk factors for heart disease in clinical narratives for diabetic patients                                      | Stubbs A.; Uzuner O.                                                                                                                                                                                  | 2015 | Journal of Biomedical Informatics                                                                               | <a href="http://dx.doi.org/10.1016/j.jbi.2015.05.009">http://dx.doi.org/10.1016/j.jbi.2015.05.009</a> | Duplicate            |
| April 2020 | Developing a cardiovascular disease risk factor annotated corpus of Chinese electronic medical records.                     | Su J.; He B.; Guan Y.; Jiang J.; Yang J.                                                                                                                                                              | 2017 | BMC medical informatics and decision making                                                                     | 10.1186/s12911-017-0512-7                                                                             | Non-cardiology focus |
| April 2020 | Real-World Data Analysis of Implantable Cardioverter Defibrillator (ICD) in Patients with Hypertrophic Cardiomyopathy (HCM) | Sungrim Moon and Andrew Wen and Christopher G. Scott and Michael J. Ackerman and Jeffrey B. Geske and Peter A. Noseworthy and Steve R Ommen and Jane L Shellum and Hongfang Liu and Rick A. Nishimura | 2020 | arXiv pre-print                                                                                                 |                                                                                                       | Included             |
| April 2020 | A Grounded Approach for Applying Behavior Change Techniques in Mobile Cardiac Tele-Rehabilitation                           | Supraja Sankaran; Ines Frederix; Mieke Haesen; Paul Dendale; Kris Luyten; Karin Coninx                                                                                                                | 2016 | Proceedings of the 9th ACM International Conference on Pervasive Technologies Related to Assistive Environments | 10.1145/2910674.2910680                                                                               | No NLP focus/details |

|            |                                                                                                                   |                                                                                                                                                |      |                                                                                             |                                   |                      |
|------------|-------------------------------------------------------------------------------------------------------------------|------------------------------------------------------------------------------------------------------------------------------------------------|------|---------------------------------------------------------------------------------------------|-----------------------------------|----------------------|
| April 2020 | Identification of Sudden Cardiac Arrest (SCA) using Modified Wavelet Transform                                    | Syed Hassaan Ahmed; Nauman Razaq; Tahir Zaidi                                                                                                  | 2017 | Proceedings of the 2nd International Conference on Biomedical Signal and Image Processing   | 10.1145/3133793.3133799           | No NLP focus/details |
| April 2020 | A Smart Heart Beat Analytics System Using Wearable Device                                                         | T. Tariq; R. M. A. Latif; M. Farhan; A. Abbas; F. Ijaz                                                                                         | 2019 | 2019 2nd International Conference on Communication , Computing and Digital systems (C-CODE) | 10.1109/C-CODE.2019.8680983       | No NLP focus/details |
| April 2020 | Comparison of 2 Natural Language Processing Methods for Identification of Bleeding Among Critically Ill Patients. | Taggart M.; Chapman WW.; Steinberg BA.; Ruckel S.; Pregenzer-Wenzler A.; Du Y.; Ferraro J.; Bucher BT.; Lloyd-Jones DM.; Rondina MT.; Shah RU. | 2018 | JAMA network open                                                                           | 10.1001/jamanetworkopen.2018.3451 | Non-cardiology focus |
| April 2020 | Medical text categorization using SEBLA and Kernel Discriminant Analysis                                          | Tahir, M.A.; Khan, E.; Al Salem, A.                                                                                                            | 2015 | 2015 2nd World Symposium on Web Applications and Networking, WSWAN 2015                     | 10.1109/WSWAN.2015.7210310        | Non-cardiology focus |
| April 2020 | Auth ,Ån,Å Scan: Opportunistic Photoplethysmography in Mobile Fingerprint Authentication                          | Takahiro Hashizume; Takuya Arizono; Koji Yatani                                                                                                | 2018 | Proc. ACM Interact. Mob. Wearable Ubiquitous Technol.                                       | 10.1145/3161189                   | No NLP focus/details |

|            |                                                                                                                                                                                                        |                                                                                                                                                         |      |                                                                                        |                                  |                      |
|------------|--------------------------------------------------------------------------------------------------------------------------------------------------------------------------------------------------------|---------------------------------------------------------------------------------------------------------------------------------------------------------|------|----------------------------------------------------------------------------------------|----------------------------------|----------------------|
| April 2020 | Convolutional neural network regression for short-axis left ventricle segmentation in cardiac cine MR sequences                                                                                        | Tan, L.K.; Liew, Y.M.; Lim, E.; McLaughlin, R.A.                                                                                                        | 2017 | Medical Image Analysis                                                                 | 10.1016/j.media.2017.04.002      | No NLP focus/details |
| April 2020 | Evaluation of a Multi-Tier Heterogeneous Sensor Network for Patient Monitoring: The Case of Benin                                                                                                      | Thierry Oscar C. Edoh; Athanase Atchome; Bidossessi R.U. Alahassa; Pravin Pawar                                                                         | 2016 | Proceedings of the 2016 ACM Workshop on Multimedia for Personal Health and Health Care | 10.1145/2985766.2985772          | Non-cardiology focus |
| April 2020 | Implementing Artificial Intelligence and Digital Health in Resource-Limited Settings? Top 10 Lessons We Learned in Congenital Heart Defects and Cardiology.                                            | Thomford NE.; Bope CD.; Agamah FE.; Dzobo K.; Owusu Ateko R.; Chimusa E.; Mazandu GK.; Ntumba SB.; Dandara C.; Wonkam A.                                | 2019 | Omics : a journal of integrative biology                                               | 10.1089/omi.2019.0142            | No NLP focus/details |
| April 2020 | Focusing on the Future of Cardiovascular Outcomes Research: Highlights From the American Heart Association/American Stroke Association Quality of Care and Outcomes Research 2018 Scientific Sessions. | Thompson MP.; Fanaroff AC.; Parker JD.; Vallabhajosyula S.; Sterling MR.                                                                                | 2018 | Circulation. Cardiovascular quality and outcomes                                       | 10.1161/CIRCO.UTCOMES.118.004871 | No NLP focus/details |
| April 2020 | Patient-Reported Outcomes in Online Communications on Statins, Memory, and Cognition: Qualitative Analysis Using Online Communities.                                                                   | Timimi F.; Ray S.; Jones E.; Aase L.; Hoffman K.                                                                                                        | 2019 | Journal of medical Internet research                                                   | 10.2196/14809                    | Non-cardiology focus |
| April 2020 | Deep learning in ophthalmology: The technical and clinical considerations.                                                                                                                             | Ting DSW.; Peng L.; Varadarajan AV.; Keane PA.; Burlina PM.; Chiang MF.; Schmetterer L.; Pasquale LR.; Bressler NM.; Webster DR.; Abramoff M.; Wong TY. | 2019 | Progress in retinal and eye research                                                   | 10.1016/j.preteyeres.2019.04.003 | Non-cardiology focus |
| April 2020 | Combining string and phonetic similarity matching to identify misspelt names of drugs in medical records written in Portuguese.                                                                        | Tissot H.; Dobson R.                                                                                                                                    | 2019 | Journal of biomedical semantics                                                        | 10.1186/s13326-019-0216-2        | Non-cardiology focus |

|            |                                                                                                                                                                       |                                                                                            |      |                                                                 |                                                                                                                       |                      |
|------------|-----------------------------------------------------------------------------------------------------------------------------------------------------------------------|--------------------------------------------------------------------------------------------|------|-----------------------------------------------------------------|-----------------------------------------------------------------------------------------------------------------------|----------------------|
| April 2020 | Cardiac catheterization laboratory inpatient forecast tool: a prospective evaluation.                                                                                 | Toerper MF.; Flanagan E. Siddiqui S.; Appelbaum J.; Kasper EK.; Levin S.                   | 2016 | Journal of the American Medical Informatics Association : JAMIA | 10.1093/jamia/ocv124                                                                                                  | Included             |
| April 2020 | Automated identification of wound information in clinical notes of patients with heart diseases: Developing and validating a natural language processing application. | Topaz M.; Lai K.; Dowding D.; Lei VJ.; Zisberg A.; Bowles KH.; Zhou L.                     | 2016 | International journal of nursing studies                        | 10.1016/j.ijnurstu.2016.09.013                                                                                        | Similar study        |
| April 2020 | Studying Associations Between Heart Failure Self-Management and Rehospitalizations Using Natural Language Processing.                                                 | Topaz M.; Radhakrishnan K.; Blackley S.; Lei V.; Lai K.; Zhou L.                           | 2017 | Western journal of nursing research                             | 10.1177/0193945916668493                                                                                              | Included             |
| April 2020 | Mining Clinicians' Electronic Documentation to Identify Heart Failure Patients with Ineffective Self-Management: A Pilot Text-Mining Study.                           | Topaz M.; Radhakrishnan K.; Lei V.; Zhou L.                                                | 2016 | Studies in health technology and informatics                    |                                                                                                                       | Non-cardiology focus |
| April 2020 | Risk factor detection for heart disease by applying text analytics in electronic medical records                                                                      | Torii M.; Fan J.-W.; Yang W.-L.; Lee T.; Wiley M.T.; Zisook D.S.; Huang Y.                 | 2015 | Journal of Biomedical Informatics                               | <a href="http://dx.doi.org/10.1016/j.jbi.2015.08.011">http://dx.doi.org/10.1016/j.jbi.2015.08.011</a>                 | Non-cardiology focus |
| April 2020 | Risk factor detection for heart disease by applying text analytics in electronic medical records.                                                                     | Torii M.; Fan JW.; Yang WL.; Lee T.; Wiley MT.; Zisook DS.; Huang Y.                       | 2015 | Journal of biomedical informatics                               | 10.1016/j.jbi.2015.08.011                                                                                             | Duplicate            |
| April 2020 | Cardiovascular risk prediction functions underestimate risk in HIV infection                                                                                          | Triant V.A.; Perez J.; Regan S.; Massaro J.M.; Meigs J.B.; Grinspoon S.K.; D'Agostino R.B. | 2018 | Circulation                                                     | <a href="http://dx.doi.org/10.1161/CIRCULATIONAHA.117.028975">http://dx.doi.org/10.1161/CIRCULATIONAHA.117.028975</a> | No NLP focus/details |
| April 2020 | Deep Natural Language Processing Identifies Variation in Care Preference Documentation.                                                                               | Udelsman BV.; Moseley ET.; Sudore RL.; Keating NL.; Lindvall C.                            | 2020 | Journal of pain and symptom management                          | 10.1016/j.jpainsymman.2019.12.374                                                                                     | Non-cardiology focus |
| April 2020 | Mining heart disease risk factors in clinical text with named entity recognition and distributional semantic models.                                                  | Urbain J.                                                                                  | 2015 | Journal of biomedical informatics                               | 10.1016/j.jbi.2015.08.009                                                                                             | Duplicate            |
| April 2020 | Mining heart disease risk factors in clinical text with named entity recognition and distributional semantic models                                                   | Urbain, J.                                                                                 | 2015 | Journal of Biomedical Informatics                               | 10.1016/j.jbi.2015.08.009                                                                                             | Non-cardiology focus |

|            |                                                                                                                                    |                                                                                                                                            |      |                                                                                                                                                                                           |                                                                                                                 |                      |
|------------|------------------------------------------------------------------------------------------------------------------------------------|--------------------------------------------------------------------------------------------------------------------------------------------|------|-------------------------------------------------------------------------------------------------------------------------------------------------------------------------------------------|-----------------------------------------------------------------------------------------------------------------|----------------------|
| April 2020 | Practical applications for natural language processing in clinical research: The 2014 i2b2/UTHealth shared tasks                   | Uzuner O.; Stubbs A.                                                                                                                       | 2015 | Journal of Biomedical Informatics                                                                                                                                                         | <a href="http://dx.doi.org/10.1016/j.jbi.2015.10.007">http://dx.doi.org/10.1016/j.jbi.2015.10.007</a>           | Non-cardiology focus |
| April 2020 | Comparing Artificial Intelligence Approaches to Retrieve Clinical Reports Documenting Implantable Devices Posing MRI Safety Risks. | Valtchinov VI.; Lacson R.; Wang A.; Khorasani R.                                                                                           | 2020 | Journal of the American College of Radiology : JACR                                                                                                                                       | 10.1016/j.jacr.2019.07.018                                                                                      | Included             |
| April 2020 | Ground Glass Lesions on Chest Imaging: Evaluation of Reported Incidence in Cancer Patients Using Natural Language Processing.      | Van Haren RM.; Correa AM.; Sepesi B.; Rice DC.; Hofstetter WL.; Mehran RJ.; Vaporciyan AA.; Walsh GL.; Roth JA.; Swisher SG.; Antonoff MB. | 2019 | The Annals of thoracic surgery                                                                                                                                                            | 10.1016/j.athoracsur.2018.09.016                                                                                | Non-cardiology focus |
| April 2020 | Information extraction from Italian medical reports: An ontology-driven approach                                                   | Viani N.; Larizza C.; Tibollo V.; Napolitano C.; Priori S.G.; Bellazzi R.; Sacchi L.                                                       | 2018 | International Journal of Medical Informatics                                                                                                                                              | <a href="http://dx.doi.org/10.1016/j.ijmedinf.2017.12.013">http://dx.doi.org/10.1016/j.ijmedinf.2017.12.013</a> | Non-cardiology focus |
| April 2020 | Supervised methods to extract clinical events from cardiology reports in Italian.                                                  | Viani N.; Miller TA.; Napolitano C.; Priori SG.; Savova GK.; Bellazzi R.; Sacchi L.                                                        | 2019 | Journal of biomedical informatics                                                                                                                                                         | 10.1016/j.jbi.2019.103219                                                                                       | Duplicate            |
| April 2020 | Visualizing patient journals by combining vital signs monitoring and natural language processing.                                  | Vilic A.; Petersen JA.; Hoppe K.; Sorensen HB.                                                                                             | 2016 | Conference proceedings : ... Annual International Conference of the IEEE Engineering in Medicine and Biology Society. IEEE Engineering in Medicine and Biology Society. Annual Conference | 10.1109/EMBC.2016.7591245                                                                                       | Non-cardiology focus |



|            |                                                                                                                                                                  |                                                                                                                          |      |                                                                                                                                                                                     |                                                                                     |                      |
|------------|------------------------------------------------------------------------------------------------------------------------------------------------------------------|--------------------------------------------------------------------------------------------------------------------------|------|-------------------------------------------------------------------------------------------------------------------------------------------------------------------------------------|-------------------------------------------------------------------------------------|----------------------|
| April 2020 | Evaluation of discovered clinical pathways using process mining and joint agent-based discrete-event simulation                                                  | Vincent Augusto; Xiaolan Xie; Martin Prodel; Baptiste Jouaneton; Ludovic Lamarsalle                                      | 2016 | Proceedings of the 2016 Winter Simulation Conference                                                                                                                                |                                                                                     | Non-cardiology focus |
| April 2020 | Emotional health: A data driven approach to understand our emotions and improve our health                                                                       | Vuppalapati, C.; Kedari, S.; Ilapakurti, A.; Shankar J.                                                                  | 2019 | Proceedings - 22nd IEEE International Conference on Computational Science and Engineering and 17th IEEE International Conference on Embedded and Ubiquitous Computing, CSE/EUC 2019 | 10.1109/CSE/EUC.2019.00071                                                          | Non-cardiology focus |
| April 2020 | Extraction of Ejection Fraction from Echocardiography Notes for Constructing a Cohort of Patients having Heart Failure with reduced Ejection Fraction (HFREF).   | Waghlikar KB.; Fischer CM.; Goodson A.; Herrick CD.; Rees M.; Toscano E.; MacRae CA.; Scirica BM.; Desai AS.; Murphy SN. | 2018 | Journal of medical systems                                                                                                                                                          | 10.1007/s10916-018-1066-7                                                           | Included             |
| April 2020 | Characterization of potential serious allergic reactions using data from natural language processing (NLP) within an electronic health record (EHR) based system | Wang F.T.; Song J.; Lin N.D.                                                                                             | 2017 | Pharmacoeconomics and Drug Safety                                                                                                                                                   | <a href="http://dx.doi.org/10.1002/pds.4275">http://dx.doi.org/10.1002/pds.4275</a> | Non-cardiology focus |
| April 2020 | Combining mechanism-based prediction with patient-based profiling for psoriasis metabolomics biomarker discovery.                                                | Wang Q.; McCormick TS.; Ward NL.; Cooper KD.; Conic R.; Xu R.                                                            | 2017 | AMIA ... Annual Symposium proceedings. AMIA Symposium                                                                                                                               |                                                                                     | Non-cardiology focus |

|            |                                                                                                                                                              |                                                                                                                                                                                                                                         |      |                                                                                                             |                                                                                                                         |                      |
|------------|--------------------------------------------------------------------------------------------------------------------------------------------------------------|-----------------------------------------------------------------------------------------------------------------------------------------------------------------------------------------------------------------------------------------|------|-------------------------------------------------------------------------------------------------------------|-------------------------------------------------------------------------------------------------------------------------|----------------------|
| April 2020 | NLP based congestive heart failure case finding: A prospective analysis on statewide electronic medical records.                                             | Wang Y.; Luo J.; Hao S.; Xu H.; Shin AY.; Jin B.; Liu R.; Deng X.; Wang L.; Zheng L.; Zhao Y.; Zhu C.; Hu Z.; Fu C.; Hao Y.; Zhao Y.; Jiang Y.; Dai D.; Culver DS.; Alfreds ST.; Todd R.; Stearns F.; Sylvester KG.; Widen E.; Ling XB. | 2015 | International journal of medical informatics                                                                | 10.1016/j.ijmedinf.2015.06.007                                                                                          | Included             |
| April 2020 | An Automatic Detection Algorithm for T Wave Position based on T Wave Morphology                                                                              | Wanyue Li; Lishen Qiu; Jie Zhang; Wenliang Zhu; Lirong Wang                                                                                                                                                                             | 2019 | Proceedings of the 2019 4th International Conference on Biomedical Signal and Image Processing (ICBIP 2019) | 10.1145/3354031.3354052                                                                                                 | No NLP focus/details |
| April 2020 | Inclusion of unstructured text data from clinical notes improves early prediction of death or prolonged ICU stay among hospitalized patients                 | Weissman G.E.; Hubbard R.A.; Ungar L.H.; Greene C.S.; Himes B.E.; Halpern S.D.                                                                                                                                                          | 2017 | American Journal of Respiratory and Critical Care Medicine                                                  | <a href="http://dx.doi.org/10.1164/ajrccm-conference.2017.A22">http://dx.doi.org/10.1164/ajrccm-conference.2017.A22</a> | Non-cardiology focus |
| April 2020 | Natural Language Processing to Assess Documentation of Features of Critical Illness in Discharge Documents of Acute Respiratory Distress Syndrome Survivors. | Weissman GE.; Harhay MO.; Lugo RM.; Fuchs BD.; Halpern SD.; Mikkelsen ME.                                                                                                                                                               | 2016 | Annals of the American Thoracic Society                                                                     | 10.1513/AnnalsATS.201602-131OC                                                                                          | Non-cardiology focus |
| April 2020 | Desiderata for delivering NLP to accelerate healthcare AI advancement and a Mayo Clinic NLP-as-a-service implementation.                                     | Wen A.; Fu S.; Moon S.; El Wazir M.; Rosenbaum A.; Kaggal VC.; Liu S.; Sohn S.; Liu H.; Fan J.                                                                                                                                          | 2019 | NPJ digital medicine                                                                                        | 10.1038/s41746-019-0208-8                                                                                               | Non-cardiology focus |
| April 2020 | Medical subdomain classification of clinical notes using a machine learning-based natural language processing approach.                                      | Weng WH.; Waghlikar KB.; McCray AT.; Szolovits P.; Chueh HC.                                                                                                                                                                            | 2017 | BMC medical informatics and decision making                                                                 | 10.1186/s12911-017-0556-8                                                                                               | Non-cardiology focus |

|            |                                                                                                                                                                 |                                                                      |      |                                                                                                        |                                                                                                                 |                      |
|------------|-----------------------------------------------------------------------------------------------------------------------------------------------------------------|----------------------------------------------------------------------|------|--------------------------------------------------------------------------------------------------------|-----------------------------------------------------------------------------------------------------------------|----------------------|
| April 2020 | A Novel Method for Automatic Heart Murmur Diagnosis Using Phonocardiogram                                                                                       | Wenjing Wei; Ge Zhan; Xun Wang; Pengyuan Zhang; Yonghong Yan         | 2019 | Proceedings of the 2019 International Conference on Artificial Intelligence and Advanced Manufacturing | 10.1145/3358331.3358368                                                                                         | No NLP focus/details |
| April 2020 | Arrhythmia Recognition and Classification Using ECG Morphology and Segment Feature Analysis                                                                     | Wenliang Zhu; Xiaohe Chen; Yan Wang; Lirong Wang                     | 2019 | IEEE/ACM Trans. Comput. Biol. Bioinformatics                                                           | 10.1109/tcbb.2018.2846611                                                                                       | No NLP focus/details |
| April 2020 | How to get a left-ear advantage: A technical review of assessing brain asymmetry with dichotic listening.                                                       | Westerhausen R.; Kompus K.                                           | 2018 | Scandinavian journal of psychology                                                                     | 10.1111/sjop.12408                                                                                              | Non-cardiology focus |
| April 2020 | Diminished Auditory Responses during NREM Sleep Correlate with the Hierarchy of Language Processing.                                                            | Wilf M.; Ramot M.; Furman-Haran E.; Arzi A.; Levkovitz Y.; Malach R. | 2016 | PloS one                                                                                               | 10.1371/journal.pone.0157143                                                                                    | Non-cardiology focus |
| April 2020 | Artificial intelligence to identify commonly asked questions via an electronic patient portal-lessons from a cardiology department within a large health system | Wosik J.; Si S.; Henao R.; Carin L.; Patel M.R.                      | 2019 | Circulation                                                                                            | <a href="http://dx.doi.org/10.1161/circ.140.suppl_1.14805">http://dx.doi.org/10.1161/circ.140.suppl_1.14805</a> | Abstract only        |
| April 2020 | Nuclear cardiology reporting: Leaving an impression.                                                                                                            | Wu E.; Holly TA.                                                     | 2019 | Journal of nuclear cardiology : official publication of the American Society of Nuclear Cardiology     | 10.1007/s12350-018-1315-7                                                                                       | No NLP focus/details |

|            |                                                                                                                                                            |                                                                                                                                                                               |      |                                                                                                    |                                |                      |
|------------|------------------------------------------------------------------------------------------------------------------------------------------------------------|-------------------------------------------------------------------------------------------------------------------------------------------------------------------------------|------|----------------------------------------------------------------------------------------------------|--------------------------------|----------------------|
| April 2020 | SemEHR: A general-purpose semantic search system to surface semantic data from clinical notes for tailored care, trial recruitment, and clinical research. | Wu H.; Toti G.; Morley Kl.; Ibrahim ZM.; Folarin A.; Jackson R.; Kartoglu I.; Agrawal A.; Stringer C.; Gale D.; Gorrell G.; Roberts A.; Broadbent M.; Stewart R.; Dobson RJB. | 2018 | Journal of the American Medical Informatics Association : JAMIA                                    | 10.1093/jamia/ocx160           | Non-cardiology focus |
| April 2020 | Predicting Heart Failure Readmission from Clinical Notes Using Deep Learning                                                                               | X. Liu; Y. Chen; J. Bae; H. Li; J. Johnston; T. Sanger                                                                                                                        | 2019 | 2019 IEEE International Conference on Bioinformatics and Biomedicine (BIBM)                        | 10.1109/BIBM47256.2019.8983095 | Included             |
| April 2020 | Towards automatic pathology classification for a 24/7 ECG-based telemonitoring service                                                                     | Xenia Klinge; Matthias Schmitt; Andrey Girenko; Jan Alexandersson; Boichev Boichev                                                                                            | 2019 | Proceedings of the 6th international Workshop on Sensor-based Activity Recognition and Interaction | 10.1145/3361684.3361685        | No NLP focus/details |
| April 2020 | Automatic 3D Aorta Segmentation in CT Images                                                                                                               | Xiaojie Duan; Meisong Zhang; Jianming Wang; Qingliang Chen                                                                                                                    | 2018 | Proceedings of the 2nd International Conference on Biomedical Engineering and Bioinformatics       | 10.1145/3278198.3278217        | No NLP focus/details |
| April 2020 | A Sensorless Pusher Plate Position Detection Method for a Pulsatile Left Ventricular Assist Device                                                         | Xiaoqi Zhuang; Ming Yang; Fan Meng; Zhaopeng Dong; Dawei An                                                                                                                   | 2017 | Proceedings of the 7th International Conference on Bioscience, Biochemistry and Bioinformatics     | 10.1145/3051166.3051174        | No NLP focus/details |

|            |                                                                                                                                        |                                                                                        |      |                                                                                                  |                            |                      |
|------------|----------------------------------------------------------------------------------------------------------------------------------------|----------------------------------------------------------------------------------------|------|--------------------------------------------------------------------------------------------------|----------------------------|----------------------|
| April 2020 | Domain Knowledge Guided Deep Atrial Fibrillation Classification and Its Visual Interpretation                                          | Xiaoyu Li; Buyue Qian; Jishang Wei; Xianli Zhang; Sirui Chen; Qinghua Zheng; none none | 2019 | Proceedings of the 28th ACM International Conference on Information and Knowledge Management     | 10.1145/3357384.3357998    | No NLP focus/details |
| April 2020 | Extracting and analyzing ejection fraction values from electronic echocardiography reports in a large health maintenance organization. | Xie F.; Zheng C.; Yuh-Jer Shen A.; Chen W.                                             | 2017 | Health informatics journal                                                                       | 10.1177/1460458216651917   | Included             |
| April 2020 | An Automatic Detection Scheme of Acute Stanford Type A Aortic Dissection Based on DCNNs in CTA Images                                  | Xin Xu; Zhiqiang He; Kai Niu; Yijie Zhang; Hao Tang; Ling Tan                          | 2019 | Proceedings of the 2019 4th International Conference on Multimedia Systems and Signal Processing | 10.1145/3330393.3330405    | No NLP focus/details |
| April 2020 | Cardiovascular risk prediction method based on test analysis and data mining ensemble system                                           | Xu, S.; Shi, H.; Duan, X.; Zhu, T.; Wu, P.; Liu, D.                                    | 2016 | Proceedings of 2016 IEEE International Conference on Big Data Analysis, ICBDA 2016               | 10.1109/ICBDA.2016.7509809 | Non-cardiology focus |
| April 2020 | Yield of CT Pulmonary Angiography in the Emergency Department When Providers Override Evidence-based Clinical Decision Support.        | Yan Z.; Ip IK.; Raja AS.; Gupta A.; Kosowsky JM.; Khorasani R.                         | 2017 | Radiology                                                                                        | 10.1148/radiol.2016151985  | Non-cardiology focus |
| April 2020 | A hybrid model for automatic identification of risk factors for heart disease.                                                         | Yang H.; Garibaldi JM.                                                                 | 2015 | Journal of biomedical informatics                                                                | 10.1016/j.jbi.2015.09.006  | Duplicate            |
| April 2020 | A hybrid model for automatic identification of risk factors for heart disease                                                          | Yang, H.; Garibaldi, J.M.                                                              | 2015 | Journal of Biomedical Informatics                                                                | 10.1016/j.jbi.2015.09.006  | Non-cardiology focus |

|            |                                                                                                                         |                                                                                              |      |                                                                                                             |                             |                      |
|------------|-------------------------------------------------------------------------------------------------------------------------|----------------------------------------------------------------------------------------------|------|-------------------------------------------------------------------------------------------------------------|-----------------------------|----------------------|
| April 2020 | Automatic Segmentation of Left Myocardium in CMR Based on Fully Convolutional Networks                                  | Yifan Du; Yuanlin Zhu; Shengjie Wu; Wang Lihui; Zhu YueMin; Yang Feng                        | 2018 | Proceedings of the 3rd International Conference on Crowd Science and Engineering                            | 10.1145/3265689.3265710     | No NLP focus/details |
| April 2020 | Coronary Ascending Aorta Segmentation in CTA Images Using SegNet Method                                                 | Yihua Song; Chen Ge; Ji Ye; Zuojian Zhou                                                     | 2019 | Proceedings of the Third International Symposium on Image Computing and Digital Medicine                    | 10.1145/3364836.3364845     | No NLP focus/details |
| April 2020 | Cardiac arrhythmia classification using Hjorth Descriptors                                                              | Yingthawornsuk, T.; Temsang, P.                                                              | 2019 | Advances in Intelligent Systems and Computing                                                               | 10.1007/978-3-319-94703-7_9 | No NLP focus/details |
| April 2020 | Muscle Artifacts Cancellation Framework for ECG Signals Combining Convolution Auto-encoder and Average Beat Subtraction | Yongfeng Huang; Zijian Ding; Guijin Wang; Jianpin Lin; Ping Zhang                            | 2019 | Proceedings of the 2019 4th International Conference on Biomedical Signal and Image Processing (ICBIP 2019) | 10.1145/3354031.3354041     | No NLP focus/details |
| April 2020 | Comparison of Different Algorithms for Sentiment Analysis: Psychological Stress Notes.                                  | Yoon S.; Parsons F.; Sundquist K.; Julian J.; Schwartz JE.; Burg MM.; Davidson KW.; Diaz KM. | 2017 | Studies in health technology and informatics                                                                |                             | Non-cardiology focus |
| April 2020 | An Efficient Pattern Recognition Kernel-Based Method for Atrial Fibrillation Diagnosis                                  | Z. Haddi; B. Ananou; Y. Trardi; J. Pons; S. Delliaux; M. Ouladsine; J. Deharo                | 2018 | 2018 Computing in Cardiology Conference (CinC)                                                              | 10.22489/CinC.2018.090      | No NLP focus/details |

|            |                                                                                                                                                                                       |                                                                                                                                                                                                                                |      |                                                                                                                                                                                                                                |                                                                                                 |                      |
|------------|---------------------------------------------------------------------------------------------------------------------------------------------------------------------------------------|--------------------------------------------------------------------------------------------------------------------------------------------------------------------------------------------------------------------------------|------|--------------------------------------------------------------------------------------------------------------------------------------------------------------------------------------------------------------------------------|-------------------------------------------------------------------------------------------------|----------------------|
| April 2020 | Late Radiation and Cardiovascular Adverse Effects After Androgen Deprivation and High-Dose Radiation Therapy in Prostate Cancer: Results From the DART 01/05 Randomized Phase 3 Trial | Zapatero, A.; Guerrero, A.; Maldonado, X.; Álvarez, A.; González-San Segundo, C.; Cabeza Rodríguez, M.A.; Macías, V.; Pedro Olive, A.; Casas, F.; Boladeras, A.; Martín de Vidales, C.; Vázquez de la Torre, M.L.; Calvo, F.A. | 2016 | International Journal of Radiation Oncology Biology Physics                                                                                                                                                                    | 10.1016/j.ijrobp.2016.06.2445                                                                   | Non-cardiology focus |
| April 2020 | Extracting frailty status for post surgical mortality prediction                                                                                                                      | Zeng-Treitler, Q.; Shao, Y.; Cheng, Y.; Doing-Harris, K.; Shah, R.U.; Weir, C.R.; Bray, B.E.                                                                                                                                   | 2018 | MCCSIS 2018 - Multi Conference on Computer Science and Information Systems; Proceedings of the International Conferences on e-Health 2018, ICT, Society, and Human Beings 2018 and Web Based Communities and Social Media 2018 |                                                                                                 | Non-cardiology focus |
| April 2020 | Lifestyle Counseling and Long-term Clinical Outcomes in Patients With Diabetes.                                                                                                       | Zhang H.; Goldberg SI.; Hosomura N.; Shubina M.; Simonson DC.; Testa MA.; Turchin A.                                                                                                                                           | 2019 | Diabetes care                                                                                                                                                                                                                  | 10.2337/dc19-0629                                                                               | Non-cardiology focus |
| April 2020 | Electronic documentation of lifestyle counseling in primary care is associated with lower risk of cardiovascular events in patients with diabetes                                     | Zhang H.; Hosomura N.; Shubina M.; Simonson D.C.; Testa M.A.; Turchin A.                                                                                                                                                       | 2016 | Diabetes                                                                                                                                                                                                                       | <a href="http://dx.doi.org/10.2337/db16-1375-1656">http://dx.doi.org/10.2337/db16-1375-1656</a> | Abstract only        |

|            |                                                                                                                       |                                                                                                        |      |                                                                              |                                                                                                                                   |                      |
|------------|-----------------------------------------------------------------------------------------------------------------------|--------------------------------------------------------------------------------------------------------|------|------------------------------------------------------------------------------|-----------------------------------------------------------------------------------------------------------------------------------|----------------------|
| April 2020 | Statin persistence after documented adverse reactions is associated with better patient outcomes                      | Zhang H.; Plutzky J.; Shubina M.; Turchin A.                                                           | 2016 | Endocrine Reviews                                                            | <a href="http://dx.doi.org/10.1210/endo-meetings.2016.CE.5.SUN-589">http://dx.doi.org/10.1210/endo-meetings.2016.CE.5.SUN-589</a> | Abstract only        |
| April 2020 | Statin persistence after reported adverse reactions and patient outcomes                                              | Zhang H.; Plutzky J.; Shubina M.; Turchin A.                                                           | 2015 | Circulation                                                                  |                                                                                                                                   | Abstract only        |
| April 2020 | Continued Statin Prescriptions After Adverse Reactions and Patient Outcomes: A Cohort Study.                          | Zhang H.; Plutzky J.; Shubina M.; Turchin A.                                                           | 2017 | Annals of internal medicine                                                  | 10.7326/M16-0838                                                                                                                  | Duplicate            |
| April 2020 | Analysis of vascular endothelial dysfunction genes and related pathways in obesity through systematic bioinformatics. | Zhang H.; Wang J.; Sun L.; Xu Q.; Hou M.; Ding Y.; Huang J.; Chen Y.; Cao L.; Zhang J.; Qian W.; Lv H. | 2015 | Bio-medical materials and engineering                                        | 10.3233/BME-151490                                                                                                                | Duplicate            |
| April 2020 | Analysis of vascular endothelial dysfunction genes and related pathways in obesity through systematic bioinformatics  | Zhang H.; Wang J.; Sun L.; Xu Q.; Hou M.; Ding Y.; Huang J.; Chen Y.; Cao L.; Zhang J.; Qian W.; Lv H. | 2015 | Bio-medical materials and engineering                                        | <a href="http://dx.doi.org/10.3233/BME-151490">http://dx.doi.org/10.3233/BME-151490</a>                                           | Duplicate            |
| April 2020 | Predictors of EGFR slope at one year in kidney transplants-a big data approach                                        | Zhang J.; Su Z.; Taber D.; Marsden J.; Moran W.; Mauldin P.; Srinivas T.                               | 2016 | American Journal of Transplantation                                          | <a href="http://dx.doi.org/10.1111/ajt.13897">http://dx.doi.org/10.1111/ajt.13897</a>                                             | Non-cardiology focus |
| April 2020 | Automatic Methods to Extract New York Heart Association Classification from Clinical Notes.                           | Zhang R.; Ma S.; Shanahan L.; Munroe J.; Horn S.; Speedie S.                                           | 2017 | Proceedings. IEEE International Conference on Bioinformatics and Biomedicine | 10.1109/BIBM.2017.8217848                                                                                                         | Duplicate            |
| April 2020 | Discovering and identifying New York heart association classification from electronic health records.                 | Zhang R.; Ma S.; Shanahan L.; Munroe J.; Horn S.; Speedie S.                                           | 2018 | BMC medical informatics and decision making                                  | 10.1186/s12911-018-0625-7                                                                                                         | Included             |



|            |                                                                                                                                             |                                                                                                                                                                                                                                                                                                                |      |                                                                                               |                           |                      |
|------------|---------------------------------------------------------------------------------------------------------------------------------------------|----------------------------------------------------------------------------------------------------------------------------------------------------------------------------------------------------------------------------------------------------------------------------------------------------------------|------|-----------------------------------------------------------------------------------------------|---------------------------|----------------------|
| April 2020 | Use of natural language processing to improve predictive models for imaging utilization in children presenting to the emergency department. | Zhang X.; Bellolio MF.; Medrano-Gracia P.; Werys K.; Yang S.; Mahajan P.                                                                                                                                                                                                                                       | 2019 | BMC medical informatics and decision making                                                   | 10.1186/s12911-019-1006-6 | Non-cardiology focus |
| April 2020 | High-throughput phenotyping with electronic medical record data using a common semi-supervised approach (PheCAP).                           | Zhang Y.; Cai T.; Yu S.; Cho K.; Hong C.; Sun J.; Huang J.; Ho YL.; Ananthakrishnan AN.; Xia Z.; Shaw SY.; Gainer V.; Castro V.; Link N.; Honerlaw J.; Huang S.; Gagnon D.; Karlson EW.; Plenge RM.; Szolovits P.; Savova G.; Churchill S.; O'Donnell C.; Murphy SN.; Gaziano JM.; Kohane I.; Cai T.; Liao KP. | 2019 | Nature protocols                                                                              | 10.1038/s41596-019-0227-6 | Non-cardiology focus |
| April 2020 | Analysis of vascular endothelial dysfunction genes and related pathways in obesity through systematic bioinformatics1                       | Zhang, H.; Wang, J.; Sun, L.; Xu, Q.; Hou, M.; Ding, Y.; Huang, J.; Chen, Y.; Cao, L.; Zhang, J.; Qian, W.; Lv, H.                                                                                                                                                                                             | 2015 | Bio-Medical Materials and Engineering                                                         | 10.3233/BME-151490        | No NLP focus/details |
| April 2020 | Automatic methods to extract New York heart association classification from clinical notes                                                  | Zhang, R.; Ma, S.; Shanahan, L.; Munroe, J.; Horn, S.; Speedie, S.                                                                                                                                                                                                                                             | 2017 | Proceedings - 2017 IEEE International Conference on Bioinformatics and Biomedicine, BIBM 2017 | 10.1109/BIBM.2017.8217848 | Duplicate            |
| April 2020 | CardioTF, a database of deconstructing transcriptional circuits in the heart system                                                         | Zhen, Y.                                                                                                                                                                                                                                                                                                       | 2016 | PeerJ                                                                                         | 10.7717/peerj.2339        | No NLP focus/details |

|            |                                                                                                                                                                                                                                  |                                                                                                                                                                                                                                                 |      |                                           |                                                                                           |                      |
|------------|----------------------------------------------------------------------------------------------------------------------------------------------------------------------------------------------------------------------------------|-------------------------------------------------------------------------------------------------------------------------------------------------------------------------------------------------------------------------------------------------|------|-------------------------------------------|-------------------------------------------------------------------------------------------|----------------------|
| April 2020 | An automated algorithm to identify treadmill stress test results for emergency department patients                                                                                                                               | Zheng C.; Sun B.; Lee M.-S.; Wu Y.-L.; Lin B.; Shen E.; Redberg R.F.; Ferencik M.; Natsui S.; Kawatkar A.; Gould M.; Sharp A.L.; Engineer R.S.                                                                                                  | 2019 | Academic Emergency Medicine               | <a href="http://dx.doi.org/10.1111/ace.m.13756">http://dx.doi.org/10.1111/ace.m.13756</a> | Included             |
| April 2020 | Automated Identification and Extraction of Exercise Treadmill Test Results.                                                                                                                                                      | Zheng C.; Sun BC.; Wu YL.; Lee MS.; Shen E.; Redberg RF.; Ferencik M.; Natsui S.; Kawatkar AA.; Musigdilok VV.; Sharp AL.                                                                                                                       | 2020 | Journal of the American Heart Association | 10.1161/JAHA.119.014940                                                                   | Duplicate            |
| April 2020 | Web-based Real-Time Case Finding for the Population Health Management of Patients With Diabetes Mellitus: A Prospective Validation of the Natural Language Processing-Based Algorithm With Statewide Electronic Medical Records. | Zheng L.; Wang Y.; Hao S.; Shin AY.; Jin B.; Ngo AD.; Jackson-Browne MS.; Feller DJ.; Fu T.; Zhang K.; Zhou X.; Zhu C.; Dai D.; Yu Y.; Zheng G.; Li YM.; McElhinney DB.; Culver DS.; Alfreds ST.; Stearns F.; Sylvester KG.; Widen E.; Ling XB. | 2016 | JMIR medical informatics                  | 10.2196/medinform.6328                                                                    | Non-cardiology focus |
| April 2020 | Effective Information Extraction Framework for Heterogeneous Clinical Reports Using Online Machine Learning and Controlled Vocabularies.                                                                                         | Zheng S.; Lu JJ.; Ghasemzadeh N.; Hayek SS.; Quyyumi AA.; Wang F.                                                                                                                                                                               | 2017 | JMIR medical informatics                  | 10.2196/medinform.7235                                                                    | Non-cardiology focus |
| April 2020 | UACFinder: Mining Syntactic Carriers of Unspecified Assumptions in Medical Cyber-Physical System Design Models                                                                                                                   | Zhicheng Fu; Chunhui Guo; Zhenyu Zhang; Shangping Ren; Lui Sha                                                                                                                                                                                  | 2020 | ACM Trans. Cyber-Phys. Syst.              | 10.1145/3375405                                                                           | Non-cardiology focus |
| April 2020 | Automated closed-loop model checking of implantable pacemakers using abstraction trees                                                                                                                                           | Zhihao Jiang; Houssam Abbas; Pieter J. Mosterman; Rahul Mangharam                                                                                                                                                                               | 2017 | SIGBED Rev.                               | 10.1145/3076125.3076127                                                                   | No NLP focus/details |
| April 2020 | Advanced Data Analytics for Clinical Research Part II: Application to Cardiothoracic Surgery.                                                                                                                                    | Zhou N.; Corsini EM.; Jin S.; Barbosa GR.; Kell T.; Antonoff MH.; Antonoff MB.                                                                                                                                                                  | 2020 | Innovations (Philadelphia, Pa.)           | 10.1177/1556984520902824                                                                  | Duplicate            |

|            |                                                                                                                                                    |                                                                                                                                                                                                                                                                                                                                                                                                                                                                                                                                                                                                                                                                                                                                                                            |      |                                 |                           |                            |
|------------|----------------------------------------------------------------------------------------------------------------------------------------------------|----------------------------------------------------------------------------------------------------------------------------------------------------------------------------------------------------------------------------------------------------------------------------------------------------------------------------------------------------------------------------------------------------------------------------------------------------------------------------------------------------------------------------------------------------------------------------------------------------------------------------------------------------------------------------------------------------------------------------------------------------------------------------|------|---------------------------------|---------------------------|----------------------------|
| April 2020 | Advanced Data Analytics for Clinical Research Part I: What are the Tools?                                                                          | Zhou N.; Corsini EM.; Jin S.; Barbosa GR.; Kell T.; Antonoff MH.; Antonoff MB.                                                                                                                                                                                                                                                                                                                                                                                                                                                                                                                                                                                                                                                                                             | 2020 | Innovations (Philadelphia, Pa.) | 10.1177/1556984520902783  | Review/perspective article |
| April 2020 | The CAFA challenge reports improved protein function prediction and new functional annotations for hundreds of genes through experimental screens. | Bergquist TR.; Lee AJ.; Kacsoh BZ.; Crocker AW.; Lewis KA.; Georghiou G.; Nguyen HN.; Hamid MN.; Davis L.; Dogan T.; Atalay V.; Rifaioglu AS.; Dalkf±ran A.; Cetin Atalay R.; Zhang C.; Hurto RL.; Freddolino PL.; Zhang Y.; Bhat P.; Supek F.; Fernv°ndez JM.; Gemovic B.; Perovic VR.; Davidovijfá RS.; Sumonja N.; Veljkovic N.; Asgari E.; Mofrad MRK.; Profiti G.; Savojardo C.; Martelli PL.; Casadio R.; Boecker F.; Schoof H.; Kahanda I.; Thurlby N.; McHardy AC.; Renaux A.; Saidi R.; Gough J.; Freitas AA.; Antczak M.; Fabris F.; Wass MN.; Hou J.; Cheng J.; Wang Z.; Romero AE.; Paccanaro A.; Yang H.; Goldberg T.; Zhao C.; Holm L.; Tvðrvðnen P.; Medlar AJ.; Zosa E.; Borukhov I.; Novikov I.; Wilkins A.; Lichtarge O.; Chi PH.; Tseng WC.; Linial M.; | 2019 | Genome biology                  | 10.1186/s13059-019-1835-8 | Non-cardiology focus       |

|             |                                                                                                                                                   |                                                                  |      |                                                    |                              |                      |
|-------------|---------------------------------------------------------------------------------------------------------------------------------------------------|------------------------------------------------------------------|------|----------------------------------------------------|------------------------------|----------------------|
| April 2020  | Predicting 30-day Hospital Readmission with Publicly Available Administrative Database. A Conditional Logistic Regression Modeling Approach.      | Zhu K.; Lou Z.; Zhou J.; Ballester N.; Kong N.; Parikh P.        | 2015 | Methods of information in medicine                 | 10.3414/ME14-02-0017         | Non-cardiology focus |
| April 2020  | Nonadherence to Oral Antihyperglycemic Agents: Subsequent Hospitalization and Mortality among Patients with Type 2 Diabetes in Clinical Practice. | Zhu VJ.; Tu W.; Rosenman MB.; Overhage JM.                       | 2015 | Studies in health technology and informatics       |                              | Non-cardiology focus |
| April 2020  | Tool-supported Interactive Correction and Semantic Annotation of Narrative Clinical Reports.                                                      | ZvV°ra K.; TomefçkovV° M.; Pele≈°ka J.; SvV°tek V.; ZvV°rovV° J. | 2017 | Methods of information in medicine                 | 10.3414/ME16-01-0083         | Non-cardiology focus |
| April 2020  | Classification and analysis of a large collection of in vivo bioassay descriptions.                                                               | Zwierzyna M.; Overington JP.                                     | 2017 | PLoS computational biology                         | 10.1371/journal.pcbi.1005641 | Non-cardiology focus |
| April 2020  | The Joint International Symposium on Artificial Intelligence and Natural Language Processing, iSAI-NLP 2017                                       |                                                                  | 2019 | Advances in Intelligent Systems and Computing      |                              | Non-cardiology focus |
| April 2020  | 7th International Conference on Information and Communication Technologies, ICT 2015                                                              |                                                                  | 2016 | Advances in Intelligent Systems and Computing      |                              | Non-cardiology focus |
| April 2020  | 3rd International Conference on Intelligent Information Technologies, ICIIT 2018                                                                  |                                                                  | 2019 | Communications in Computer and Information Science |                              | Non-cardiology focus |
| April 2020  | Proceedings of the 3rd International Workshop on Multimedia for Personal Health and Health Care                                                   |                                                                  | 2018 |                                                    |                              | Non-cardiology focus |
| August 2021 | Respiratory Waveform Estimation From Multiple Accelerometers: An Optimal Sensor Number and Placement Analysis                                     | A. Siqueira; A. F. Spirandeli; R. Moraes; V. Zarzoso             | 2019 | IEEE Journal of Biomedical and Health Informatics  | 10.1109/JBHI.2018.2867727    | No NLP focus/details |

|             |                                                                                                                                             |                                                                                                                                                                                                                                                                           |      |                                                                                               |                                                                                                                       |                      |
|-------------|---------------------------------------------------------------------------------------------------------------------------------------------|---------------------------------------------------------------------------------------------------------------------------------------------------------------------------------------------------------------------------------------------------------------------------|------|-----------------------------------------------------------------------------------------------|-----------------------------------------------------------------------------------------------------------------------|----------------------|
| August 2021 | ECG classification and prognostic approach towards personalized healthcare                                                                  | A. Walinjkar; J. Woods                                                                                                                                                                                                                                                    | 2017 | 2017 International Conference On Social Media, Wearable And Web Analytics (Social Media)      | 10.1109/SOCIALMEDIA.2017.8057360                                                                                      | No NLP focus/details |
| August 2021 | CARE TRAJECTORY AND EARLY CLINICAL FEATURES AMONG PATIENTS WITH 99MTC-PYROPHOSPHATE POSITIVE TRANSTHYRETIN AMYLOID CARDIOMYOPATHY (ATTR-CM) | Abboud, Andrew; Camacho, Alexander; Nguonly, Austin; Fiseha, Neyat; Bean, Asher; Osborne, Michael T.; Ibrahim, Nasrien E.; McCarthy, Cian P.; Tawakol, Ahmed; Ruberg, Frederick L.; Sadjadi, Reza; David, William S.; Lewis, Gregory D.; Januzzi, James L.; Gaggin, Hanna | 2020 | Journal of the American College of Cardiology                                                 | <a href="http://dx.doi.org/10.1016/S0735-1097%2820%2931447-9">http://dx.doi.org/10.1016/S0735-1097%2820%2931447-9</a> | Abstract only        |
| August 2021 | Spectroscopic Properties of Blood for Pulse Oximeter Design                                                                                 | Abeera Vaqar; Intisar Rizwan I. Haque; Tahir Zaidi                                                                                                                                                                                                                        | 2019 | Proceedings of the 2019 9th International Conference on Biomedical Engineering and Technology | 10.1145/3326172.3326205                                                                                               | No NLP focus/details |
| August 2021 | Low Cost Portable Diagnostic Device for Automatic Classification of the Abnormal Cardiac Sound using PGC Recording                          | Abhishek Kaushal; Anjali Yadav; Malay Kishore Dutta; Carlos Travieso-Gonzalez; Luis Esteban-Hernandez                                                                                                                                                                     | 2020 | Proceedings of the 3rd International Conference on Applications of Intelligent Systems        | 10.1145/3378184.3378213                                                                                               | No NLP focus/details |

|             |                                                                                                                                                                                        |                                                                                                                                                                                                                                                                                                                                      |      |                                               |                                                                                                                       |                      |
|-------------|----------------------------------------------------------------------------------------------------------------------------------------------------------------------------------------|--------------------------------------------------------------------------------------------------------------------------------------------------------------------------------------------------------------------------------------------------------------------------------------------------------------------------------------|------|-----------------------------------------------|-----------------------------------------------------------------------------------------------------------------------|----------------------|
| August 2021 | PREVALENCE OF TRANSTHYRETIN CARDIAC AMYLOIDOSIS IN HEART FAILURE WITH PRESERVED EJECTION FRACTION: A POPULATION BASED STUDY                                                            | Abou-Ezzeddine, Omar Farid; Davies, Daniel; Sexton, Jasmine A.; Scott, Christopher G.; Fayyaz, Ahmed; Akhiyat, Nadia; Stromme, Trevor A.; Askew, John W.; McKie, Paul; Noseworthy, Peter; Dunlay, Shannon; Borlaug, Barry; Chareonthitawee, Panithaya; Johnson, Geoffrey; Dispenzieri, Angela; Grogan, Martha; Redfield, Margaret M. | 2020 | Journal of the American College of Cardiology | <a href="http://dx.doi.org/10.1016/S0735-1097%2820%2931318-8">http://dx.doi.org/10.1016/S0735-1097%2820%2931318-8</a> | Abstract only        |
| August 2021 | A method for cohort selection of cardiovascular disease records from an electronic health record system                                                                                | Abrahão, M. T. F.; Nobre, M. R. C.; Gutierrez, M. A.                                                                                                                                                                                                                                                                                 | 2017 | Int J Med Inform                              | 10.1016/j.ijmedinf.2017.03.015                                                                                        | Duplicate            |
| August 2021 | Epidemiology, clinical characteristics, household transmission, and lethality of severe acute respiratory syndrome coronavirus-2 infection among healthcare workers in Ontario, Canada | Achon, Camille; Lee, Brenda; Whelan, Michael; Wu, Julie H. C.; Buchan, Sarah A.; Brown, Kevin A.; Schwartz, Kevin L.; Garber, Gary                                                                                                                                                                                                   | 2020 | PLoS One                                      | <a href="http://dx.doi.org/10.1371/journal.pone.0244477">http://dx.doi.org/10.1371/journal.pone.0244477</a>           | Non-cardiology focus |
| August 2021 | Evaluating the Portability of an NLP System for Processing Echocardiograms: A Retrospective, Multi-site Observational Study                                                            | Adekanattu, P.; Jiang, G.; Luo, Y.; Kingsbury, P. R.; Xu, Z.; Rasmussen, L. V.; Pacheco, J. A.; Kiefer, R. C.; Stone, D. J.; Brandt, P. S.; Yao, L.; Zhong, Y.; Deng, Y.; Wang, F.; Ancker, J. S.; Champion, T. R.; Pathak, J.                                                                                                       | 2019 | AMIA Annu Symp Proc                           |                                                                                                                       | Duplicate            |

|             |                                                                                                                         |                                                                                                                |      |                                                                                               |                                                                                                         |                      |
|-------------|-------------------------------------------------------------------------------------------------------------------------|----------------------------------------------------------------------------------------------------------------|------|-----------------------------------------------------------------------------------------------|---------------------------------------------------------------------------------------------------------|----------------------|
| August 2021 | Natural language processing of clinical notes for identification of critical limb ischemia                              | Afzal, N.; Mallipeddi, V. P.; Sohn, S.; Liu, H.; Chaudhry, R.; Scott, C. G.; Kullo, I. J.; Arruda-Olson, A. M. | 2018 | Int J Med Inform                                                                              | 10.1016/j.ijmedinf.2017.12.024                                                                          | Non-cardiology focus |
| August 2021 | Mining peripheral arterial disease cases from narrative clinical notes using natural language processing                | Afzal, N.; Sohn, S.; Abram, S.; Scott, C. G.; Chaudhry, R.; Liu, H.; Kullo, I. J.; Arruda-Olson, A. M.         | 2017 | J Vasc Surg                                                                                   | 10.1016/j.jvs.2016.11.031                                                                               | Non-cardiology focus |
| August 2021 | Identification of Coronary Artery Disease using Cross Power Spectral Density                                            | Akanksha,; P. Samanta; K. Mandana; G. Saha                                                                     | 2017 | 2017 14th IEEE India Council International Conference (INDICON)                               | 10.1109/INDICON.2017.8487905                                                                            | No NLP focus/details |
| August 2021 | Automatic Identification of Information Quality Metrics in Health News Stories                                          | Al-Jefri, M.; Evans, R.; Lee, J.; Ghezzi, P.                                                                   | 2020 | Front Public Health                                                                           | 10.3389/fpubh.2020.515347                                                                               | Non-cardiology focus |
| August 2021 | Reliability in Extreme Isolation: A Natural Language Processing Tool for Stress Self-assessment                         | Alcibiade, A.; Schlacht, I. L.; Finazzi, F.; Di Capua, M.; Ferrario, G.; Musso, G.; Foing, B.                  | 2020 | Advances in Intelligent Systems and Computing                                                 | 10.1007/978-3-030-51369-6_47                                                                            | Non-cardiology focus |
| August 2021 | ECG Monitoring and Anomaly Detection Based on Compressed Measurements                                                   | Alessandra Galli; Claudio Narduzzi; Giada Giorgi                                                               | 2018 | Proceedings of the 2018 3rd International Conference on Biomedical Imaging, Signal Processing | 10.1145/3288200.3288206                                                                                 | No NLP focus/details |
| August 2021 | PCV76 IDENTIFYING KNOWLEDGE GAPS IN HEART FAILURE (HF) RESEARCH AMONG WOMEN USING UNSUPERVISED MACHINE LEARNING METHODS | Alhussain, K.; Kido, K.; Dwibedi, N.; LeMasters, T.; Sambamoorthi, U.; Rose, D. E.; Misra, R.                  | 2020 | Value in Health                                                                               | <a href="http://dx.doi.org/10.1016/j.jval.2020.04.178">http://dx.doi.org/10.1016/j.jval.2020.04.178</a> | Abstract only        |
| August 2021 | Mapping Phenotypic Information in Heterogeneous Textual Sources to a Domain-Specific Terminological Resource            | Alnazzawi, N.; Thompson, P.; Ananiadou, S.                                                                     | 2016 | PLoS One                                                                                      | 10.1371/journal.pone.0162287                                                                            | Duplicate            |

|             |                                                                                                       |                                                                                 |      |                                                                                                        |                            |                      |
|-------------|-------------------------------------------------------------------------------------------------------|---------------------------------------------------------------------------------|------|--------------------------------------------------------------------------------------------------------|----------------------------|----------------------|
| August 2021 | Using text mining techniques to extract phenotypic information from the PhenoCHF corpus               | Alnazzawi, N.; Thompson, P.; Batista-Navarro, R.; Ananiadou, S.                 | 2015 | BMC Med Inform Decis Mak                                                                               | 10.1186/1472-6947-15-s2-s3 | Duplicate            |
| August 2021 | Heart and sole - shoe-based heart monitoring: demo abstract                                           | Amelie Bonde; Shijia Pan; Hae Young Noh; Pei Zhang                              | 2017 | Proceedings of the 16th ACM/IEEE International Conference on Information Processing in Sensor Networks | 10.1145/3055031.3055048    | No NLP focus/details |
| August 2021 | Statistically Based Criteria for Complex ECG Signal Assessment at Preventive Cardio Control           | Aneliya Manukova; Ivan Georgiev; Matey Marinov                                  | 2020 | Proceedings of the 21st International Conference on Computer Systems and Technologies '20              | 10.1145/3407982.3407985    | No NLP focus/details |
| August 2021 | Patient Preferences for Authentication and Security: A Comparison Study of Younger and Older Patients | Ann Fruhling; Devika Ramachandran; Tamara Bernard; Ryan Schuetzler; John Windle | 2018 | Proceedings of the 2018 ACM SIGMIS Conference on Computers and People Research                         | 10.1145/3209626.3209702    | Non-cardiology focus |
| August 2021 | Abstracts of 48th ESCP Symposium on Clinical Pharmacy                                                 | Anonymous,                                                                      | 2020 | International Journal of Clinical Pharmacy                                                             |                            | Abstract only        |



|             |                                                                                                                                                                              |                                                                                                                       |      |                                                                                                       |                               |                      |
|-------------|------------------------------------------------------------------------------------------------------------------------------------------------------------------------------|-----------------------------------------------------------------------------------------------------------------------|------|-------------------------------------------------------------------------------------------------------|-------------------------------|----------------------|
| August 2021 | Machine Learning Approach for Pre-Eclampsia Risk Factors Association                                                                                                         | Antonieta Martínez-Velasco; Lourdes Martínez-Villasevador; Luis Miralles-Pechu <sup>o</sup> n                         | 2018 | Proceedings of the 4th EAI International Conference on Smart Objects and Technologies for Social Good | 10.1145/3284869.3284912       | Non-cardiology focus |
| August 2021 | Enhancing the Oral Bioavailability of Candesartan Cilexetil Loaded Nanostructured Lipid Carriers: In Vitro Characterization and Absorption in Rats after Oral Administration | Anwar, W.; Dawaba, H. M.; Afouna, M. I.; Samy, A. M.; Rashed, M. H.; Abdelaziz, A. E.                                 | 2020 | Pharmaceutics                                                                                         | 10.3390/pharmaceutics12111047 | No NLP focus/details |
| August 2021 | The Silent Majority: Type 2 Diabetes Mellitus and South Asia Phenotype                                                                                                       | Ao Lu                                                                                                                 | 2020 | Proceedings of the 2020 Conference on Artificial Intelligence and Healthcare                          | 10.1145/3433996.3434367       | Non-cardiology focus |
| August 2021 | TASTE: temporal and static tensor factorization for phenotyping electronic health records                                                                                    | Ardavan Afshar; Ioakeim Perros; Haesun Park; Christopher deFilippi; Xiaowei Yan; Walter Stewart; Joyce Ho; Jimeng Sun | 2020 | Proceedings of the ACM Conference on Health, Inference, and Learning                                  | 10.1145/3368555.3384464       | Non-cardiology focus |
| August 2021 | Development and exploration of polymedication network from Pharmaceutical and Medicare Benefits Scheme data                                                                  | Arif Khan; Uma Srinivasan; Shahadat Uddin                                                                             | 2019 | Proceedings of the Australasian Computer Science Week Multiconference                                 | 10.1145/3290688.3290738       | No NLP focus/details |

|             |                                                                                                                                                   |                                                                                                                                                                                                                                          |      |                                                                                                                      |                                                                                                     |                            |
|-------------|---------------------------------------------------------------------------------------------------------------------------------------------------|------------------------------------------------------------------------------------------------------------------------------------------------------------------------------------------------------------------------------------------|------|----------------------------------------------------------------------------------------------------------------------|-----------------------------------------------------------------------------------------------------|----------------------------|
| August 2021 | Multimodal Learning for Cardiovascular Risk Prediction using EHR Data                                                                             | Ayoub Bagheri; T. Katrien J. Groenhof; Wouter B. Veldhuis; Pim A. de Jong; Folkert W. Asselbergs; Daniel L. Oberski                                                                                                                      | 2020 | Proceedings of the 11th ACM International Conference on Bioinformatics, Computational Biology and Health Informatics | 10.1145/3388440.3414924                                                                             | Non-cardiology focus       |
| August 2021 | APDRChain: ANN Based Predictive Analysis of Diseases and Report Sharing Through Blockchain                                                        | Bagchi, S.; Chakraborty, M.; Chattopadhyay, A. K.                                                                                                                                                                                        | 2020 | Advances in Intelligent Systems and Computing                                                                        | 10.1007/978-981-15-0361-0_8                                                                         | Abstract only              |
| August 2021 | Screening for cardiac disease with advanced ECG, CTCA, protein biomarkers and metabolomics                                                        | Bekhit, M. Mark; Wynne, Y.; Semple, S.; Smith, K.; Gladding, P.; Dugo, C.; Larsen, P.; Shepherd, P.; Zarate, E.; Vilas-Boas, S.; Schlegel, T.                                                                                            | 2020 | European Journal of Preventive Cardiology                                                                            | <a href="http://dx.doi.org/10.1177/2047487320935268">http://dx.doi.org/10.1177/2047487320935268</a> | Non-cardiology focus       |
| August 2021 | Study of lipoprotein(a) and its impact on atherosclerotic cardiovascular disease: Design and rationale of the Mass General Brigham Lp(a) Registry | Berman, A. N.; Biery, D. W.; Ginder, C.; Hulme, O. L.; Marcusa, D.; Leiva, O.; Wu, W. Y.; Singh, A.; Divakaran, S.; Hainer, J.; Turchin, A.; Januzzi, J. L.; Natarajan, P.; Cannon, C. P.; Di Carli, M. F.; Bhatt, D. L.; Blankstein, R. | 2020 | Clin Cardiol                                                                                                         | 10.1002/clc.23456                                                                                   | Review/perspective article |

|             |                                                                                                                                                                                          |                                                                                                                                                                                                                                                                                                                                                                                                                                                          |      |                                                           |                                                                                       |               |
|-------------|------------------------------------------------------------------------------------------------------------------------------------------------------------------------------------------|----------------------------------------------------------------------------------------------------------------------------------------------------------------------------------------------------------------------------------------------------------------------------------------------------------------------------------------------------------------------------------------------------------------------------------------------------------|------|-----------------------------------------------------------|---------------------------------------------------------------------------------------|---------------|
| August 2021 | Extracting hypertrophic cardiomyopathy features from cardiac magnetic resonance reports by natural language processing                                                                   | Bhopalwala, Huzefa;<br>Chen, David; Sagheb,<br>Elham; Moon, Sungrim;<br>Masood, Muhammad;<br>Liu, Sijia; Bos, Johan;<br>Scott, Christopher;<br>Noseworthy, Peter;<br>Shellum, Jane L.;<br>Chaudhry, Rajeev;<br>Erickson, Bradley J.;<br>Araoz, Philip; Ackerman,<br>Michael J.; Arruda-<br>Olson, Adelaide;<br>Dewaswala, Nakeya;<br>Geske, Jeffrey B.;<br>Ommen, Steve;<br>Nishimura, Rick A.                                                           | 2020 | Catheterization<br>and<br>Cardiovascular<br>Interventions | <a href="http://dx.doi.org/10.1002/ccd.28864">http://dx.doi.org/10.1002/ccd.28864</a> | Abstract only |
| August 2021 | A Robust e-Epidemiology Tool in Phenotyping Heart Failure with Differentiation for Preserved and Reduced Ejection Fraction: the Electronic Medical Records and Genomics (eMERGE) Network | Bielinski, S. J.; Pathak, J.;<br>Carrell, D. S.; Takahashi,<br>P. Y.; Olson, J. E.; Larson,<br>N. B.; Liu, H.; Sohn, S.;<br>Wells, Q. S.; Denny, J. C.;<br>Rasmussen-Torvik, L. J.;<br>Pacheco, J. A.; Jackson,<br>K. L.; Lesnick, T. G.;<br>Gullerud, R. E.; Decker,<br>P. A.; Pereira, N. L.; Ryu,<br>E.; Dart, R. A.; Peissig, P.;<br>Linneman, J. G.; Jarvik,<br>G. P.; Larson, E. B.; Bock,<br>J. A.; Tromp, G. C.; de<br>Andrade, M.; Roger, V. L. | 2015 | J Cardiovasc<br>Transl Res                                | 10.1007/s1226<br>5-015-9644-2                                                         | Duplicate     |

|             |                                                                                                                                                                   |                                                                                                                        |      |                                              |                                                                                                               |                            |
|-------------|-------------------------------------------------------------------------------------------------------------------------------------------------------------------|------------------------------------------------------------------------------------------------------------------------|------|----------------------------------------------|---------------------------------------------------------------------------------------------------------------|----------------------------|
| August 2021 | Emerging Concepts and Applied Machine Learning Research in Patients with Drug-Induced Repolarization Disorders                                                    | Bjelogrljic, Mina; Robert, Arnaud; Lovis, Christian; Namdar, Mehdi; Gencer, Baris; Girardin, Francois; Miribel, Arnaud | 2020 | Studies in health technology and informatics | <a href="http://dx.doi.org/10.3233/SHTI200150">http://dx.doi.org/10.3233/SHTI200150</a>                       | Review/perspective article |
| August 2021 | Impact of 2 different aerobic periodization training protocols on left ventricular function in patients with stable coronary artery disease: an exploratory study | Boidin, M.; David, L. P.; Trachsel, L. D.; Gayda, M.; Tremblay, J.; Lalongv©, J.; Juneau, M.; Nigam, A.; Henri, C.     | 2021 | Appl Physiol Nutr Metab                      | 10.1139/apnm-2020-0423                                                                                        | No NLP focus/details       |
| August 2021 | Non-linear is not superior to linear aerobic training periodization in coronary heart disease patients                                                            | Boidin, M.; Trachsel, L. D.; Nigam, A.; Juneau, M.; Tremblay, J.; Gayda, M.                                            | 2020 | Eur J Prev Cardiol                           | 10.1177/2047487319891778                                                                                      | No NLP focus/details       |
| August 2021 | A learning healthcare system improves cardiovascular risk management: Results from the Utrecht cardiovascular cohort initiative                                   | Bots, Michael; Groenhof, Katrien; Haitjema, Saskia; Lely, Titia; Asselbergs, Folkert                                   | 2020 | Circulation                                  | <a href="http://dx.doi.org/10.1161/circ.141.suppl_1.P161">http://dx.doi.org/10.1161/circ.141.suppl_1.P161</a> | Non-cardiology focus       |
| August 2021 | Automatic prediction of coronary artery disease from clinical narratives                                                                                          | Buchan, K.; Filannino, M.; Uzuner, vñ                                                                                  | 2017 | J Biomed Inform                              | 10.1016/j.jbi.2017.06.019                                                                                     | Non-cardiology focus       |
| August 2021 | Reading the Digital Tea Leaves: Hope or Hype for Peripheral Artery Disease                                                                                        | Bunte, M. C.; Baron, S. J.                                                                                             | 2020 | Circ Cardiovasc Interv                       | 10.1161/circinterventions.120.010114                                                                          | Non-cardiology focus       |
| August 2021 | Using Artificial Intelligence Resources in Dialysis and Kidney Transplant Patients: A Literature Review                                                           | Burlacu, A.; Iftene, A.; Jugrin, D.; Popa, I. V.; Lupu, P. M.; Vlad, C.; Covic, A.                                     | 2020 | BioMed Research International                | 10.1155/2020/9867872                                                                                          | Review/perspective article |
| August 2021 | Event-Predictive Cognition: A Root for Conceptual Human Thought                                                                                                   | Butz, M. V.; Achimova, A.; Bilkey, D.; Knott, A.                                                                       | 2021 | Top Cogn Sci                                 | 10.1111/tops.12522                                                                                            | Non-cardiology focus       |

|             |                                                                                                                                                                 |                                                                                                                                                |      |                                                                                                          |                                                                                                       |                      |
|-------------|-----------------------------------------------------------------------------------------------------------------------------------------------------------------|------------------------------------------------------------------------------------------------------------------------------------------------|------|----------------------------------------------------------------------------------------------------------|-------------------------------------------------------------------------------------------------------|----------------------|
| August 2021 | A data-driven feature extraction framework for predicting the severity of condition of congestive heart failure patients                                        | C. Sideris; N. Alshurafa; M. Pourhomayoun; F. Shahmohammadi; L. Samy; M. Sarrafzadeh                                                           | 2015 | 2015 37th Annual International Conference of the IEEE Engineering in Medicine and Biology Society (EMBC) | 10.1109/EMBC.2015.7318908                                                                             | Abstract only        |
| August 2021 | EXTraction of EMR numerical data: an efficient and generalizable tool to EXTEND clinical research                                                               | Cai, T.; Zhang, L.; Yang, N.; Kumamaru, K. K.; Rybicki, F. J.; Cai, T.; Liao, K. P.                                                            | 2019 | BMC Med Inform Decis Mak                                                                                 | 10.1186/s12911-019-0970-1                                                                             | Non-cardiology focus |
| August 2021 | Mixed reality application for improving the procedural planning of mitral valve disease                                                                         | Carlos J. Latorre                                                                                                                              | 2019 | Proceedings of the IX Latin American Conference on Human Computer Interaction                            | 10.1145/3358961.3358991                                                                               | No NLP focus/details |
| August 2021 | Persuasive design of a mobile coaching app to encourage a healthy lifestyle during menopause                                                                    | Caterina Senette; Maria Claudia Buzzi; Maria Teresa Paratore; Amaury Trujillo                                                                  | 2018 | Proceedings of the 17th International Conference on Mobile and Ubiquitous Multimedia                     | 10.1145/3282894.3282899                                                                               | Non-cardiology focus |
| August 2021 | A context-aware approach for progression tracking of medical concepts in electronic medical records                                                             | Chang, N. W.; Dai, H. J.; Jonnagaddala, J.; Chen, C. W.; Tsai, R. T.; Hsu, W. L.                                                               | 2015 | J Biomed Inform                                                                                          | 10.1016/j.jbi.2015.09.013                                                                             | Non-cardiology focus |
| August 2021 | Natural History of Abdominal Aortic Aneurysm Expansion: Fifteen-Year Analysis of Nearly 15,000 Patients Under Surveillance in a Large, Integrated Health System | Chang, Robert; Hull, Michaela; Adams, John L.; McGlynn, Elizabeth A.; Lancaster, Elizabeth M.; Avins, Andrew; Sivamurthy, Nayan; Okuhn, Steven | 2020 | Journal of Vascular Surgery                                                                              | <a href="http://dx.doi.org/10.1016/j.jvs.2020.04.139">http://dx.doi.org/10.1016/j.jvs.2020.04.139</a> | Non-cardiology focus |

|             |                                                                                                                                 |                                                                                                                                                                                                                                                                                        |      |                                                                                   |                                 |                      |
|-------------|---------------------------------------------------------------------------------------------------------------------------------|----------------------------------------------------------------------------------------------------------------------------------------------------------------------------------------------------------------------------------------------------------------------------------------|------|-----------------------------------------------------------------------------------|---------------------------------|----------------------|
| August 2021 | Research on Hypertension Prediction and Diagnosis Based on Big Data                                                             | Changxin Song; Ke Ma                                                                                                                                                                                                                                                                   | 2020 | 2020 3rd International Conference on Digital Medicine and Image Processing        | 10.1145/3441369.3441376         | Non-cardiology focus |
| August 2021 | Deformable Deep Network Atherosclerotic Coronary Plaque Recognition of Oct Imaging                                              | Chaoyu Sun; Hai Huang; Zhaoliang Wan                                                                                                                                                                                                                                                   | 2020 | Proceedings of the 4th International Conference on Medical and Health Informatics | 10.1145/3418094.3418107         | Abstract only        |
| August 2021 | Detecting Adverse Drug Events with Rapidly Trained Classification Models                                                        | Chapman, A. B.; Peterson, K. S.; Alba, P. R.; DuVall, S. L.; Patterson, O. V.                                                                                                                                                                                                          | 2019 | Drug Saf                                                                          | 10.1007/s40264-018-0763-y       | Non-cardiology focus |
| August 2021 | Usability of a Digital Registry to Promote Secondary Prevention for Peripheral Artery Disease Patients                          | Chaudhry, A. P.; Hankey, R. A.; Kaggal, V. C.; Bhopalwala, H.; Liedl, D. A.; Wennberg, P. W.; Rooke, T. W.; Scott, C. G.; Disdier Moulder, M. P.; Hendricks, A. K.; Casanegra, A. I.; McBane, R. D.; Shellum, J. L.; Kullo, I. J.; Nishimura, R. A.; Chaudhry, R.; Arruda-Olson, A. M. | 2021 | Mayo Clin Proc Innov Qual Outcomes                                                | 10.1016/j.mayocpiqo.2020.09.012 | Non-cardiology focus |
| August 2021 | Emergency department disposition prediction using a deep neural network with integrated clinical narratives and structured data | Chen, C. H.; Hsieh, J. G.; Cheng, S. L.; Lin, Y. L.; Lin, P. H.; Jeng, J. H.                                                                                                                                                                                                           | 2020 | Int J Med Inform                                                                  | 10.1016/j.ijmedinf.2020.104146  | Non-cardiology focus |

|             |                                                                                                           |                                                                                                                                                                 |      |                                                                                                   |                                                                                         |                      |
|-------------|-----------------------------------------------------------------------------------------------------------|-----------------------------------------------------------------------------------------------------------------------------------------------------------------|------|---------------------------------------------------------------------------------------------------|-----------------------------------------------------------------------------------------|----------------------|
| August 2021 | An automatic system to identify heart disease risk factors in clinical texts over time                    | Chen, Q.; Li, H.; Tang, B.; Wang, X.; Liu, X.; Liu, Z.; Liu, S.; Wang, W.; Deng, Q.; Zhu, S.; Chen, Y.; Wang, J.                                                | 2015 | J Biomed Inform                                                                                   | 10.1016/j.jbi.2015.09.002                                                               | Non-cardiology focus |
| August 2021 | A New Transfer Function for Volume Visualization of Aortic Stent and Its Application to Virtual Endoscopy | Chenxi Huang; Yisha Lan; Guokai Zhang; Gaowei Xu; Landu Jiang; Nianyin Zeng; Jenhong Tan; E. Y. K. Ng; Yongqiang Cheng; Ningzhi Han; Rongrong Ji; Yonghong Peng | 2020 | ACM Trans. Multimedia Comput. Commun. Appl.                                                       | 10.1145/3373358                                                                         | No NLP focus/details |
| August 2021 | BreathLive: Liveness Detection for Heart Sound Authentication with Deep Breathing                         | Chenyu Huang; Huangxun Chen; Lin Yang; Qian Zhang                                                                                                               | 2018 | Proc. ACM Interact. Mob. Wearable Ubiquitous Technol.                                             | 10.1145/3191744                                                                         | No NLP focus/details |
| August 2021 | iCarMa: Inexpensive Cardiac Arrhythmia Management -- An IoT Healthcare Analytics Solution                 | Chetanya Puri; Arijit Ukil; Soma Bandyopadhyay; Rituraj Singh; Arpan Pal; Kayapanda Mandana                                                                     | 2016 | Proceedings of the First Workshop on IoT-enabled Healthcare and Wellness Technologies and Systems | 10.1145/2933566.2933567                                                                 | No NLP focus/details |
| August 2021 | Formal representation of patients' care context data: the path to improving the electronic health record  | Colicchio, T. K.; Dissanayake, P. I.; Cimino, J. J.                                                                                                             | 2020 | J Am Med Inform Assoc                                                                             | 10.1093/jamia/ocaa134                                                                   | Non-cardiology focus |
| August 2021 | Machine learning models to predict childhood and adolescent obesity: A review                             | Colmenarejo, Gonzalo                                                                                                                                            | 2020 | Nutrients                                                                                         | <a href="http://dx.doi.org/10.3390/nu12082466">http://dx.doi.org/10.3390/nu12082466</a> | Non-cardiology focus |
| August 2021 | Agile text mining for the 2014 i2b2/UTHealth Cardiac risk factors challenge                               | Cormack, J.; Nath, C.; Milward, D.; Raja, K.; Jonnalagadda, S. R.                                                                                               | 2015 | J Biomed Inform                                                                                   | 10.1016/j.jbi.2015.06.030                                                               | Non-cardiology focus |

|             |                                                                                                                                |                                                                                                    |      |                                                                       |                                                                                                         |                      |
|-------------|--------------------------------------------------------------------------------------------------------------------------------|----------------------------------------------------------------------------------------------------|------|-----------------------------------------------------------------------|---------------------------------------------------------------------------------------------------------|----------------------|
| August 2021 | Effects of coaching on adherence in remote health monitoring systems: analysis and prediction of participant adherence         | Costas Sideris; Nabil Alshurafa; Haik Kalantarian; Majid Sarrafzadeh; Jo-Ann Eastwood              | 2015 | Proceedings of the conference on Wireless Health                      | 10.1145/2811780.2811949                                                                                 | Non-cardiology focus |
| August 2021 | Research on Risk Prediction of Dyslipidemia in Steel Workers Based on Recurrent Neural Network and LSTM Neural Network         | Cui, S.; Li, C.; Chen, Z.; Wang, J.; Yuan, J.                                                      | 2020 | IEEE Access                                                           | 10.1109/ACCESS.2020.2974887                                                                             | Non-cardiology focus |
| August 2021 | Virtual heart team-a Machine Intelligence augmented environment for evidence-based and data-driven therapeutic decision making | Cypko, M. A.; Falk, V.; Meyer, A.                                                                  | 2020 | International Journal of Computer Assisted Radiology and Surgery      | <a href="http://dx.doi.org/10.1007/s11548-020-02171-6">http://dx.doi.org/10.1007/s11548-020-02171-6</a> | Abstract only        |
| August 2021 | Cohort selection for clinical trials using multiple instance learning                                                          | Dai, Hong-Jie; Wang, Feng-Duo; Chen, Chih-Wei; Su, Chu-Hsien; Wu, Chi-Shin; Jonnagaddala, Jitendra | 2020 | Journal of Biomedical Informatics                                     | <a href="http://dx.doi.org/10.1016/j.jbi.2020.103438">http://dx.doi.org/10.1016/j.jbi.2020.103438</a>   | Non-cardiology focus |
| August 2021 | Health Consumer Usage Patterns in Management of CVD using Data Mining Techniques                                               | Devipriyaa Nagappan; Jim Warren; Patricia Riddle                                                   | 2019 | Proceedings of the Australasian Computer Science Week Multiconference | 10.1145/3290688.3290732                                                                                 | No NLP focus/details |



|             |                                                                                                                                                    |                                                                                                                                                                                                                                    |      |                                                                                                  |                                                                                                         |                      |
|-------------|----------------------------------------------------------------------------------------------------------------------------------------------------|------------------------------------------------------------------------------------------------------------------------------------------------------------------------------------------------------------------------------------|------|--------------------------------------------------------------------------------------------------|---------------------------------------------------------------------------------------------------------|----------------------|
| August 2021 | Extracting hypertrophic cardiomyopathy features from cardiac magnetic resonance reports by natural language processing                             | Dewaswala-Bhopalwala, N.; Chen, D.; Bhopalwala, H.; Hossein Pour, S.; Moon, S.; Bos, D.; Scott, C.; Geske, J.; Noseworthy, P.; Ommen, S. R.; Erickson, B. J.; Araoz, P. A.; Nishimura, R. A.; Ackerman, M. J.; Arruda-Olson, A. M. | 2020 | European Heart Journal                                                                           | <a href="http://dx.doi.org/10.1093/ehjci/ehaa946.0199">http://dx.doi.org/10.1093/ehjci/ehaa946.0199</a> | Abstract only        |
| August 2021 | When Sharing Economy Meets IoT: Towards Fine-grained Urban Air Quality Monitoring through Mobile Crowdsensing on Bike-share System                 | Di Wu; Tao Xiao; Xuewen Liao; Jie Luo; Chao Wu; Shigeng Zhang; Yong Li; Yike Guo                                                                                                                                                   | 2020 | Proc. ACM Interact. Mob. Wearable Ubiquitous Technol.                                            | 10.1145/3397328                                                                                         | Non-cardiology focus |
| August 2021 | Automatic Detection of Vital Signs in Clinical Notes of the Outpatient Settings                                                                    | Diaz Maffini, M.; Aguirre Ojea, F.; Manzotti, M.                                                                                                                                                                                   | 2020 | Stud Health Technol Inform                                                                       | 10.3233/shti200367                                                                                      | Non-cardiology focus |
| August 2021 | Building a Natural Language Processing Tool to Identify Patients With High Clinical Suspicion for Kawasaki Disease from Emergency Department Notes | Doan, S.; Maehara, C. K.; Chaparro, J. D.; Lu, S.; Liu, R.; Graham, A.; Berry, E.; Hsu, C. N.; Kanegaye, J. T.; Lloyd, D. D.; Ohno-Machado, L.; Burns, J. C.; Tremoulet, A. H.                                                     | 2016 | Acad Emerg Med                                                                                   | 10.1111/acem.12925                                                                                      | Non-cardiology focus |
| August 2021 | FoodAI: Food Image Recognition via Deep Learning for Smart Food Logging                                                                            | Doyen Sahoo; Wang Hao; Shu Ke; Wu Xiongwei; Hung Le; Palakorn Achananuparp; Ee-Peng Lim; Steven C. H. Hoi                                                                                                                          | 2019 | Proceedings of the 25th ACM SIGKDD International Conference on Knowledge Discovery & Data Mining | 10.1145/3292500.3330734                                                                                 | No NLP focus/details |

|             |                                                                                                                                |                                                                                                                                                         |      |                                                                                                        |                                                                                               |                            |
|-------------|--------------------------------------------------------------------------------------------------------------------------------|---------------------------------------------------------------------------------------------------------------------------------------------------------|------|--------------------------------------------------------------------------------------------------------|-----------------------------------------------------------------------------------------------|----------------------------|
| August 2021 | Development and future deployment of a 5 years allograft survival model for kidney transplantation                             | DuBay, D. A.; Su, Z.; Morinelli, T. A.; Baliga, P. Rohan, V.; Bian, J.; Northrup, D.; Pilch, N.; Rao, V.; Srinivas, T. R.; Mauldin, P. D.; Taber, D. J. | 2019 | Nephrology (Carlton)                                                                                   | 10.1111/nep.13488                                                                             | Non-cardiology focus       |
| August 2021 | Machine learning algorithms in cardiology domain: A systematic review                                                          | Dudchenko, A.; Ganzinger, M.; Kopanitsa, G.                                                                                                             | 2020 | Open Bioinformatics Journal                                                                            | 10.2174/1875036202013010025                                                                   | Review/perspective article |
| August 2021 | Integrating Artificial and Human Intelligence: A Partnership for Responsible Innovation in Biomedical Engineering and Medicine | Dzobo, Kevin; Adotey, Sampson; Thomford, Nicholas E.; Dzobo, Witness                                                                                    | 2020 | OMICS A Journal of Integrative Biology                                                                 | <a href="http://dx.doi.org/10.1089/omi.2019.0038">http://dx.doi.org/10.1089/omi.2019.0038</a> | Review/perspective article |
| August 2021 | Novel Imputing Method and Deep Learning Techniques for Early Prediction of Sepsis in Intensive Care Units                      | E. Macias; G. Boquet; J. Serrano; J. Vicario; J. Ibeas; A. Morel                                                                                        | 2019 | 2019 Computing in Cardiology (CinC)                                                                    | 10.23919/CinC49843.2019.9005794                                                               | Non-cardiology focus       |
| August 2021 | A Novel Tool for Non-Invasive Fetal Electrocardiography Research: the NinFEA Dataset                                           | E. Sulas; G. Pili; E. Gusai; G. Baldazzi; M. Urru; R. Tumbarello; L. Raffo; D. Pani                                                                     | 2020 | 2020 42nd Annual International Conference of the IEEE Engineering in Medicine & Biology Society (EMBC) | 10.1109/EMBC44109.2020.9176327                                                                | No NLP focus/details       |
| August 2021 | Natural Language Processing for Detecting Medication-Related Notes in Heart Failure Telehealth Patients                        | Eggerth, A.; Kreiner, K.; Hayn, D.; Pfeifer, B.; Pvdzlz, G.; Egelseer-Brvndl, T.; Schreier, G.                                                          | 2020 | Stud Health Technol Inform                                                                             | 10.3233/shti200263                                                                            | Included                   |
| August 2021 | Extracting Angina Symptoms from Clinical Notes Using Pre-Trained Transformer Architectures                                     | Eisman, Aaron S.; Chen, Elizabeth S.; Shah, Nishant R.; Wu, Wen-Chih; Eickhoff, Carsten; Zerveas, George; Sarkar, Indra Neil                            | 2020 | AMIA ... Annual Symposium proceedings. AMIA Symposium                                                  |                                                                                               | Non-cardiology focus       |

|             |                                                                                            |                                                                                            |      |                                                                                                          |                           |                      |
|-------------|--------------------------------------------------------------------------------------------|--------------------------------------------------------------------------------------------|------|----------------------------------------------------------------------------------------------------------|---------------------------|----------------------|
| August 2021 | The Heart of the Matter: Patient Autonomy as a Model for the Wellbeing of Technology Users | Emanuelle Burton; Kristel Clayville; Judy Goldsmith; Nicholas Mattei                       | 2019 | Proceedings of the 2019 AAAI/ACM Conference on AI, Ethics, and Society                                   | 10.1145/3306618.3314254   | Non-cardiology focus |
| August 2021 | Time Series Analysis Using Fractal and Multifractal Methods                                | Evgeniya Gospodinova                                                                       | 2019 | Proceedings of the 20th International Conference on Computer Systems and Technologies                    | 10.1145/3345252.3345265   | No NLP focus/details |
| August 2021 | Nonlinear Dynamics Methods for Analysis of ECG Signals                                     | Evgeniya Gospodinova; Mitko Gospodinov; Maria Negreva                                      | 2020 | Proceedings of the 21st International Conference on Computer Systems and Technologies '20                | 10.1145/3407982.3408000   | No NLP focus/details |
| August 2021 | Beat-to-beat heart rate detection by smartphone's accelerometers: Validation with ECG      | F. Landreani; A. Martin-Yebra; C. Casellato; C. Frigo; E. Pavan; P. Migeotte; E. G. Caiani | 2016 | 2016 38th Annual International Conference of the IEEE Engineering in Medicine and Biology Society (EMBC) | 10.1109/EMBC.2016.7590755 | No NLP focus/details |
| August 2021 | Mining Temporal Patterns from Sequential Healthcare Data                                   | F. Movahedi; Y. Zhang; R. Padman; J. F. Antaki                                             | 2018 | 2018 IEEE International Conference on Healthcare Informatics (ICHI)                                      | 10.1109/ICHI.2018.00103   | No NLP focus/details |

|             |                                                                                                                                                                                               |                                                                                                                                                    |      |                                               |                                                                                                         |                            |
|-------------|-----------------------------------------------------------------------------------------------------------------------------------------------------------------------------------------------|----------------------------------------------------------------------------------------------------------------------------------------------------|------|-----------------------------------------------|---------------------------------------------------------------------------------------------------------|----------------------------|
| August 2021 | New Approaches to Conducting Randomized Controlled Trials                                                                                                                                     | Fanaroff, Alexander C.; Califf, Robert M.; Lopes, Renato D.                                                                                        | 2020 | Journal of the American College of Cardiology | <a href="http://dx.doi.org/10.1016/j.jacc.2019.11.043">http://dx.doi.org/10.1016/j.jacc.2019.11.043</a> | Review/perspective article |
| August 2021 | Lipid Abnormalities in Patients With Cushing's Disease and Its Relationship With Impaired Glucose Metabolism                                                                                  | Feng, Ming; Bao, Xinjie; Deng, Kan; Yao, Yong; Wang, Renzhi; Sun, Xiaolin; Zhao, Zixuan; Lu, Lin; Zhu, Huijuan                                     | 2020 | Frontiers in Endocrinology                    | <a href="http://dx.doi.org/10.3389/fendo.2020.600323">http://dx.doi.org/10.3389/fendo.2020.600323</a>   | Non-cardiology focus       |
| August 2021 | Risk of mortality and cardiopulmonary arrest in critical patients presenting to the emergency department using machine learning and natural language processing                               | Fernandes, M.; Mendes, R.; Vieira, S. M.; Leite, F.; Palos, C.; Johnson, A.; Finkelstein, S.; Horng, S.; Celi, L. A.                               | 2020 | PLoS One                                      | 10.1371/journal.pone.0230876                                                                            | Non-cardiology focus       |
| August 2021 | Classification of Patients with Coronary Microvascular Dysfunction                                                                                                                            | Fodeh, S. J.; Li, T.; Jarad, H.; Safdar, B.                                                                                                        | 2020 | IEEE/ACM Trans Comput Biol Bioinform          | 10.1109/tcbb.2019.2914442                                                                               | Abstract only              |
| August 2021 | Using natural language processing to extract structured epilepsy data from unstructured clinic letters: development and validation of the ExECT (extraction of epilepsy clinical text) system | Fonferko-Shadrach, B.; Lacey, A. S.; Roberts, A.; Akbari, A.; Thompson, S.; Ford, D. V.; Lyons, R. A.; Rees, M. I.; Pickrell, W. O.                | 2019 | BMJ Open                                      | 10.1136/bmjopen-2018-023232                                                                             | Non-cardiology focus       |
| August 2021 | Heart Failure Dashboard Design and Validation to Improve Care of Veterans                                                                                                                     | Foster, Marva; Albanese, Catherine; Chen, Qiang; Evans, Stewart; Sethares, Kristen A.; Lehmann, Lisa Soleymani; Spencer, Jacqueline; Joseph, Jacob | 2020 | Applied clinical informatics                  | <a href="http://dx.doi.org/10.1055/s-0040-1701257">http://dx.doi.org/10.1055/s-0040-1701257</a>         | No NLP focus/details       |
| August 2021 | Identifying adults at risk of unintentional severe hypoglycemia in hospital using artificial intelligence (RUSHH-AI)                                                                          | Fralick, Michael; Dai, David; Pou-Prom, Chloe; Verma, Amol A.; Mamdani, Muhammad                                                                   | 2020 | Diabetes                                      | <a href="http://dx.doi.org/10.2337/db20-265-OR">http://dx.doi.org/10.2337/db20-265-OR</a>               | Non-cardiology focus       |

|             |                                                                                                                                   |                                                                                 |      |                                                                                           |                                                                                                       |                            |
|-------------|-----------------------------------------------------------------------------------------------------------------------------------|---------------------------------------------------------------------------------|------|-------------------------------------------------------------------------------------------|-------------------------------------------------------------------------------------------------------|----------------------------|
| August 2021 | The Next Frontier in Pediatric Cardiology: Artificial Intelligence                                                                | Gaffar, S.; Gearhart, A. S.; Chang, A. C.                                       | 2020 | Pediatr Clin North Am                                                                     | 10.1016/j.pcl.2020.06.010                                                                             | Review/perspective article |
| August 2021 | Wavelet Based method for Non-Stationary Time Series Processing                                                                    | Galya Georgieva-Tsaneva                                                         | 2020 | Proceedings of the 21st International Conference on Computer Systems and Technologies '20 | 10.1145/3407982.3408008                                                                               | No NLP focus/details       |
| August 2021 | Body Sensors System for Physiological Data Long-term Monitoring                                                                   | Galya Georgieva-Tsaneva                                                         | 2020 | Proceedings of the 21st International Conference on Computer Systems and Technologies '20 | 10.1145/3407982.3408009                                                                               | Non-cardiology focus       |
| August 2021 | Mimvec: a deep learning approach for analyzing the human phenome                                                                  | Gan, M.; Li, W.; Zeng, W.; Wang, X.; Jiang, R.                                  | 2017 | BMC Syst Biol                                                                             | 10.1186/s12918-017-0451-z                                                                             | Non-cardiology focus       |
| August 2021 | The anatomy of the SARS-CoV-2 biomedical literature: Introducing the covidx network algorithm for drug repurposing recommendation | Gates, Lyndsey Elaine; Hamed, Ahmed Abdeen                                      | 2020 | Journal of Medical Internet Research                                                      | <a href="http://dx.doi.org/10.2196/21169">http://dx.doi.org/10.2196/21169</a>                         | Non-cardiology focus       |
| August 2021 | A primer on artificial intelligence for the paediatric cardiologist                                                               | Gearhart, Addison; Gaffar, Sharib; Chang, Anthony C.                            | 2020 | Cardiology in the Young                                                                   | <a href="http://dx.doi.org/10.1017/S1047951120001493">http://dx.doi.org/10.1017/S1047951120001493</a> | Review/perspective article |
| August 2021 | Assigning clinical codes with data-driven concept representation on Dutch clinical free text                                      | Goethals, Bart; Scheurwags, Elyne; Daelemans, Walter; Luyckx, Kim; Luyten, Leon | 2017 | Journal of Biomedical Informatics                                                         | <a href="http://dx.doi.org/10.1016/j.jbi.2017.04.007">http://dx.doi.org/10.1016/j.jbi.2017.04.007</a> | Non-cardiology focus       |

|             |                                                                                                                                                      |                                                                                                                                                                                                                                                                                                                                                                                                                                                             |      |                                  |                                                                                                                 |                      |
|-------------|------------------------------------------------------------------------------------------------------------------------------------------------------|-------------------------------------------------------------------------------------------------------------------------------------------------------------------------------------------------------------------------------------------------------------------------------------------------------------------------------------------------------------------------------------------------------------------------------------------------------------|------|----------------------------------|-----------------------------------------------------------------------------------------------------------------|----------------------|
| August 2021 | Characteristics and Prognosis of COVID-19 in Patients with COPD                                                                                      | Graziani, D.; Soriano, J. B.; Del Rio-Bermudez, C.; Morena, D.; DV#az, T.; Castillo, M.; Alonso, M.; Ancochea, J.; Lumbreras, S.; Izquierdo, J. L.                                                                                                                                                                                                                                                                                                          | 2020 | J Clin Med                       | 10.3390/jcm9103259                                                                                              | Non-cardiology focus |
| August 2021 | Data mining information from electronic health records produced high yield and accuracy for current smoking status                                   | Groenhof, T. Katrien J.; Koers, Laurien R.; Grobbee, Diederick E.; Blasse, Enja; de Groot, Mark; Haitjema, Saskia; van Solinge, Wouter; Hoefler, Imo; Asselbergs, Folkert W.; Nathoe, Hendrik M.; de Borst, Gert-Jan; Bots, Michiel L.; Geerlings, Mirjam I.; Emmelot, Marielle H.; de Jong, Pim A.; Leiner, Tim; Lely, A. Titia; van der Kaaij, Niels P.; Kappelle, L. Jaap; Ruigrok, Ynte M.; Verhaar, Marianne C.; Visseren, Frank L. J.; Westerink, Jan | 2020 | Journal of Clinical Epidemiology | <a href="http://dx.doi.org/10.1016/j.jclinepi.2019.11.006">http://dx.doi.org/10.1016/j.jclinepi.2019.11.006</a> | Non-cardiology focus |
| August 2021 | Combining glass box and black box evaluations in the identification of heart disease risk factors and their temporal relations from clinical records | Grouin, C.; Moriceau, V.; Zweigenbaum, P.                                                                                                                                                                                                                                                                                                                                                                                                                   | 2015 | J Biomed Inform                  | 10.1016/j.jbi.2015.06.014                                                                                       | Non-cardiology focus |
| August 2021 | Development of text mining based classification of written communication within a telemedical collaborative network                                  | Gruber, K.; Modre-Osprian, R.; Kreiner, K.; Kastner, P.; Schreier, G.                                                                                                                                                                                                                                                                                                                                                                                       | 2015 | Stud Health Technol Inform       |                                                                                                                 | Non-cardiology focus |

|             |                                                                                                                                               |                                                                                                                                                                                             |      |                                                                                        |                              |                            |
|-------------|-----------------------------------------------------------------------------------------------------------------------------------------------|---------------------------------------------------------------------------------------------------------------------------------------------------------------------------------------------|------|----------------------------------------------------------------------------------------|------------------------------|----------------------------|
| August 2021 | Automated Electronic Phenotyping of Cardioembolic Stroke                                                                                      | Guan, W.; Ko, D.; Khurshid, S.; Trisini Lipsanopoulos, A. T.; Ashburner, J. M.; Harrington, L. X.; Rost, N. S.; Atlas, S. J.; Singer, D. E.; McManus, D. D.; Anderson, C. D.; Lubitz, S. A. | 2021 | Stroke                                                                                 | 10.1161/strokeaha.120.030663 | Outside date range         |
| August 2021 | Social media based surveillance systems for healthcare using machine learning: A systematic review                                            | Gupta, A.; Katarya, R.                                                                                                                                                                      | 2020 | Journal of Biomedical Informatics                                                      | 10.1016/j.jbi.2020.103500    | Review/perspective article |
| August 2021 | On Clinical Event Prediction in Patient Treatment Trajectory Using Longitudinal Electronic Health Records                                     | H. Duan; Z. Sun; W. Dong; K. He; Z. Huang                                                                                                                                                   | 2020 | IEEE Journal of Biomedical and Health Informatics                                      | 10.1109/JBHI.2019.2962079    | Non-cardiology focus       |
| August 2021 | Noncontact Sleep Stage Estimation Using a CW Doppler Radar                                                                                    | H. Hong; L. Zhang; C. Gu; Y. Li; G. Zhou; X. Zhu                                                                                                                                            | 2018 | IEEE Journal on Emerging and Selected Topics in Circuits and Systems                   | 10.1109/JETCAS.2017.2789278  | No NLP focus/details       |
| August 2021 | Identify Rare Disease Patients from Electronic Health Records through Machine Learning Approach                                               | H. Soni; A. Vyas; U. Singh                                                                                                                                                                  | 2018 | 2018 International Conference on Inventive Research in Computing Applications (ICIRCA) | 10.1109/ICIRCA.2018.8597203  | Non-cardiology focus       |
| August 2021 | Automated Transformation of openEHR Data Instances to OWL                                                                                     | Haarbrandt, B.; Jack, T.; Marschollek, M.                                                                                                                                                   | 2016 | Stud Health Technol Inform                                                             |                              | Non-cardiology focus       |
| August 2021 | Electronic medical record phenotyping using the anchor and learn framework                                                                    | Halpern, Y.; Horng, S.; Choi, Y.; Sontag, D.                                                                                                                                                | 2016 | J Am Med Inform Assoc                                                                  | 10.1093/jamia/ocw011         | Non-cardiology focus       |
| August 2021 | An evaluation of DistillerSR's machine learning-based prioritization tool for title/abstract screening - impact on reviewer-relevant outcomes | Hamel, C.; Kelly, S. E.; Thavorn, K.; Rice, D. B.; Wells, G. A.; Hutton, B.                                                                                                                 | 2020 | BMC Med Res Methodol                                                                   | 10.1186/s12874-020-01129-1   | Non-cardiology focus       |

|             |                                                                                                                                                                                     |                                                                                                 |      |                                                                                                 |                         |                      |
|-------------|-------------------------------------------------------------------------------------------------------------------------------------------------------------------------------------|-------------------------------------------------------------------------------------------------|------|-------------------------------------------------------------------------------------------------|-------------------------|----------------------|
| August 2021 | Improving the Efficacy of the Data Entry Process for Clinical Research With a Natural Language Processing-Driven Medical Information Extraction System: Quantitative Field Research | Han, J.; Chen, K.; Fang, L.; Zhang, S.; Wang, F.; Ma, H.; Zhao, L.; Liu, S.                     | 2019 | JMIR Med Inform                                                                                 | 10.2196/13331           | Non-cardiology focus |
| August 2021 | The Research on Fractal Dimension of Diabetic Patients Based on ECG Signal                                                                                                          | Hao Ma; Xin'an Wang; Tianxia Zhao; He Sun; Zhong Liu                                            | 2019 | Proceedings of the 2019 4th International Conference on Mathematics and Artificial Intelligence | 10.1145/3325730.3325766 | Non-cardiology focus |
| August 2021 | Automatic Estimation of Enjoyment Levels during Cardiac Rehabilitation Exercise                                                                                                     | Haolin Wei; Kieran Moran; Noel E. O'Connor                                                      | 2018 | Proceedings of the 3rd International Workshop on Multimedia for Personal Health and Health Care | 10.1145/3264996.3265003 | No NLP focus/details |
| August 2021 | BIN1 Isoform 1 has Less Function in Promoting the Stability of TAT System in Adult Rat Cardiomyocytes                                                                               | Haolin Zheng                                                                                    | 2020 | 2020 7th International Conference on Biomedical and Bioinformatics Engineering                  | 10.1145/3444884.3444898 | No NLP focus/details |
| August 2021 | User intervention based segmentation of Myocardium In cardiac cine MRI images                                                                                                       | Heenakousar Shigli; M. H. Tejas; Lohit Narayan; Shrinivas D. Desai                              | 2015 | Proceedings of the Third International Symposium on Women in Computing and Informatics          | 10.1145/2791405.2791545 | No NLP focus/details |
| August 2021 | Prediction of Stroke Outcome Using Natural Language Processing-Based Machine Learning of Radiology Report of Brain MRI                                                              | Heo, T. S.; Kim, Y. S.; Choi, J. M.; Jeong, Y. S.; Seo, S. Y.; Lee, J. H.; Jeon, J. P.; Kim, C. | 2020 | J Pers Med                                                                                      | 10.3390/jpm10040286     | Non-cardiology focus |
| August 2021 | Real world evidence in cardiovascular medicine: ensuring data validity in electronic health record-based studies                                                                    | Hernandez-Boussard, T.; Monda, K. L.; Crespo, B. C.; Riskin, D.                                 | 2019 | J Am Med Inform Assoc                                                                           | 10.1093/jamia/ocz119    | Non-cardiology focus |



|             |                                                                                                                                      |                                                                                                                                                                                    |      |                                                                                                              |                                                                                       |                      |
|-------------|--------------------------------------------------------------------------------------------------------------------------------------|------------------------------------------------------------------------------------------------------------------------------------------------------------------------------------|------|--------------------------------------------------------------------------------------------------------------|---------------------------------------------------------------------------------------|----------------------|
| August 2021 | Use of guideline-directed medical therapy for patients hospitalized with heart failure in the veterans health care system, 2013-2017 | Hess, Paul L.; Langner, Paula; Grunwald, Gary K.; Heidenreich, Paul A.; Ho, P. M.                                                                                                  | 2020 | Circulation: Cardiovascular Quality and Outcomes                                                             |                                                                                       | Abstract only        |
| August 2021 | A Virtual Reality Approach to Pediatric Conflict De-escalation and Anger Management                                                  | Heyi Liu; Mary Loveless                                                                                                                                                            | 2019 | Proceedings of the Practice and Experience in Advanced Research Computing on Rise of the Machines (learning) | 10.1145/3332186.3338098                                                               | Non-cardiology focus |
| August 2021 | Co-authorship network analysis in cardiovascular research utilizing machine learning (2009-2019)                                     | Higaki, A.; Uetani, T.; Ikeda, S.; Yamaguchi, O.                                                                                                                                   | 2020 | Int J Med Inform                                                                                             | 10.1016/j.ijmedinf.2020.104274                                                        | Non-cardiology focus |
| August 2021 | A Novel Segmentation Method for Cardiac CT Images Based on The Style Transfer Method and Convolutional Neural Networks               | Honghao Chen; Changhao Zhou; Wenliang Du; Xiaolin Tian; Lei Liu                                                                                                                    | 2019 | Proceedings of the 2019 International Conference on Artificial Intelligence and Computer Science             | 10.1145/3349341.3349461                                                               | No NLP focus/details |
| August 2021 | Exploring food contents in scientific literature with FoodMine                                                                       | Hooton, F.; Menichetti, G.; Barabv°si, A. L.                                                                                                                                       | 2020 | Sci Rep                                                                                                      | 10.1038/s41598-020-73105-0                                                            | Non-cardiology focus |
| August 2021 | Factors Associated with Incident Heart Failure Subtypes in Patients with Rheumatoid Arthritis Using Electronic Health Record Data    | Huang, Sicong; Cai, Tianrun; Weber, Brittany; He, Zeling; Dahal, Kumar; Kim, Seoyoung; Solomon, Daniel H.; Liao, Katherine; Hong, Chuan; Cai, Tianxi; Cagan, Andrew; Joseph, Jacob | 2020 | Arthritis and Rheumatology                                                                                   | <a href="http://dx.doi.org/10.1002/art.41538">http://dx.doi.org/10.1002/art.41538</a> | Non-cardiology focus |

|             |                                                                                                                    |                                                                                                                                         |      |                                                                                                  |                              |                      |
|-------------|--------------------------------------------------------------------------------------------------------------------|-----------------------------------------------------------------------------------------------------------------------------------------|------|--------------------------------------------------------------------------------------------------|------------------------------|----------------------|
| August 2021 | Comparative Study of Heart Disease Diagnosis Using Top Ten Data Mining Classification Algorithms                   | I. Ketut Agung Enriko                                                                                                                   | 2019 | Proceedings of the 5th International Conference on Frontiers of Educational Technologies         | 10.1145/3338188.3338220      | Non-cardiology focus |
| August 2021 | Heart Disease Diagnosis System with k-Nearest Neighbors Method Using Real Clinical Medical Records                 | I. Ketut Agung Enriko; Muhammad Suryanegara; Dadang Gunawan                                                                             | 2018 | Proceedings of the 4th International Conference on Frontiers of Educational Technologies         | 10.1145/3233347.3233386      | No NLP focus/details |
| August 2021 | SUSTain: Scalable Unsupervised Scoring for Tensors and its Application to Phenotyping                              | Ioakeim Perros; Evangelos E. Papalexakis; Haesun Park; Richard Vuduc; Xiaowei Yan; Christopher Defilippi; Walter F. Stewart; Jimeng Sun | 2018 | Proceedings of the 24th ACM SIGKDD International Conference on Knowledge Discovery & Data Mining | 10.1145/3219819.3219999      | Non-cardiology focus |
| August 2021 | Detection of carotid artery stenosis via electronic stethoscope: A preliminary study with heart sound segmentation | J. Li; A. Liu; W. Liu                                                                                                                   | 2015 | 2015 IEEE International Conference on Consumer Electronics - Taiwan                              | 10.1109/ICCE-TW.2015.7216868 | No NLP focus/details |
| August 2021 | Automatic Classification of Fetal Heart Rate Based on Convolutional Neural Network                                 | J. Li; Z. Chen; L. Huang; M. Fang; B. Li; X. Fu; H. Wang; Q. Zhao                                                                       | 2019 | IEEE Internet of Things Journal                                                                  | 10.1109/JIOT.2018.2845128    | Non-cardiology focus |

|             |                                                                                                                                                           |                                                                                                                                                                                        |      |                                                                                                    |                                                                                                         |                      |
|-------------|-----------------------------------------------------------------------------------------------------------------------------------------------------------|----------------------------------------------------------------------------------------------------------------------------------------------------------------------------------------|------|----------------------------------------------------------------------------------------------------|---------------------------------------------------------------------------------------------------------|----------------------|
| August 2021 | Symmetrical Compression Distance for Arrhythmia Discrimination in Cloud-Based Big-Data Services                                                           | J. M. Lillo-Castellano; I. Mora-Jimenez; R. Santiago-Mozos; F. Chavarría-Asso; A. Cano-González; A. García-Alberola; J. L. Rojo-Álvarez                                                | 2015 | IEEE Journal of Biomedical and Health Informatics                                                  | 10.1109/JBHI.2015.2412175                                                                               | No NLP focus/details |
| August 2021 | CogStack - experiences of deploying integrated information retrieval and extraction services in a large National Health Service Foundation Trust hospital | Jackson, R.; Kartoglu, I.; Stringer, C.; Gorrell, G.; Roberts, A.; Song, X.; Wu, H.; Agrawal, A.; Lui, K.; Groza, T.; Lewsley, D.; Northwood, D.; Folarin, A.; Stewart, R.; Dobson, R. | 2018 | BMC Med Inform Decis Mak                                                                           | 10.1186/s12911-018-0623-9                                                                               | Non-cardiology focus |
| August 2021 | Pharmacogenetic information in summaries of product characteristics: Analysis by natural language processing                                              | Jeiziner, C.; Hersberger, K. E.; Meyer Zu Schwabedissen, H. E.; Suter, K.                                                                                                              | 2020 | International Journal of Clinical Pharmacy                                                         | <a href="http://dx.doi.org/10.1007/s11096-019-00945-w">http://dx.doi.org/10.1007/s11096-019-00945-w</a> | Non-cardiology focus |
| August 2021 | Instance Weighting for Patient-Specific Risk Stratification Models                                                                                        | Jen J. Gong; Thoralf M. Sundt; James D. Rawn; John V. Guttag                                                                                                                           | 2015 | Proceedings of the 21th ACM SIGKDD International Conference on Knowledge Discovery and Data Mining | 10.1145/2783258.2783397                                                                                 | Non-cardiology focus |
| August 2021 | Probabilistic forecasting of surgical case duration using machine learning: model development and validation                                              | Jiao, Y.; Sharma, A.; Ben Abdallah, A.; Maddox, T. M.; Kannampallil, T.                                                                                                                | 2020 | J Am Med Assoc Inform Assoc                                                                        | 10.1093/jamia/ocaa140                                                                                   | No NLP focus/details |
| August 2021 | Learning Motion Based Auxiliary Task for Cardiomyopathy Recognition with Cardiac Magnetic Resonance Images                                                | Jingjing Xiao; Xiangjun Liu; Qian Tao; Jia Chen                                                                                                                                        | 2020 | Proceedings of the 4th International Conference on Computer Science and Application Engineering    | 10.1145/3424978.3425122                                                                                 | No NLP focus/details |

|             |                                                                                                                                                                       |                                                                                                                                      |      |                                                                                                                    |                           |                      |
|-------------|-----------------------------------------------------------------------------------------------------------------------------------------------------------------------|--------------------------------------------------------------------------------------------------------------------------------------|------|--------------------------------------------------------------------------------------------------------------------|---------------------------|----------------------|
| August 2021 | The Heart Failure Treatment of $\beta$ -Blockers                                                                                                                      | Jiujiu Su                                                                                                                            | 2020 | 2020 7th International Conference on Biomedical and Bioinformatics Engineering                                     | 10.1145/3444884.3444896   | No NLP focus/details |
| August 2021 | Hard-Label Black-Box Adversarial Attack on Deep Electrocardiogram Classifier                                                                                          | Jonathan Lam; Pengrui Quan; Jiamin Xu; Jeya Vikranth Jeyakumar; Mani Srivastava                                                      | 2020 | Proceedings of the 1st ACM International Workshop on Security and Safety for Intelligent Cyber-Physical Systems    | 10.1145/3417312.3431827   | No NLP focus/details |
| August 2021 | Coronary artery disease risk assessment from unstructured electronic health records using text mining                                                                 | Jonnagadda, J.; Liaw, S. T.; Ray, P.; Kumar, M.; Chang, N. W.; Dai, H. J.                                                            | 2015 | J Biomed Inform                                                                                                    | 10.1016/j.jbi.2015.08.003 | Duplicate            |
| August 2021 | Text Mining of the Electronic Health Record: An Information Extraction Approach for Automated Identification and Subphenotyping of HFpEF Patients for Clinical Trials | Jonnalagadda, S. R.; Adupa, A. K.; Garg, R. P.; Corona-Cox, J.; Shah, S. J.                                                          | 2017 | J Cardiovasc Transl Res                                                                                            | 10.1007/s12265-017-9752-2 | Duplicate            |
| August 2021 | Developing software for motivating individuals with intellectual disabilities to do outdoor physical activity                                                         | Juan C. Torrado; Ida Wold; Letizia Jaccheri; Susanna Pelagatti; Stefano Chessa; Javier Gomez; Gunnar Hartvigsen; Henriette Michalsen | 2020 | Proceedings of the ACM/IEEE 42nd International Conference on Software Engineering: Software Engineering in Society | 10.1145/3377815.3381376   | Non-cardiology focus |

|             |                                                                                                                                                                                                     |                                                                                                                                                     |      |                                                                            |                                                                                                                 |                            |
|-------------|-----------------------------------------------------------------------------------------------------------------------------------------------------------------------------------------------------|-----------------------------------------------------------------------------------------------------------------------------------------------------|------|----------------------------------------------------------------------------|-----------------------------------------------------------------------------------------------------------------|----------------------------|
| August 2021 | Factors Associated with Implantable Cardioverter-Defibrillator Placement among U.S. Veterans with Left Ventricular Ejection Fraction $\leq 35\%$ at Least 40 Days after Acute Myocardial Infarction | Judson, Gregory L.; Cohen, Beth; Muniyappa, Anoop; Raitt, Merritt; Shen, Hui; Tarasovsky, Gary; Whooley, Mary; Dhruva, Sanket                       | 2020 | Circulation                                                                | <a href="http://dx.doi.org/10.1161/circ.142.suppl_3.16101">http://dx.doi.org/10.1161/circ.142.suppl_3.16101</a> | No NLP focus/details       |
| August 2021 | Research on the Hypertension Syndrome Elements Differentiation of TCM Based on Multi-label Learning and Ensemble Learning                                                                           | Jun Li; Jianqiang Li; Dongyi Yi                                                                                                                     | 2018 | Proceedings of the 2018 International Conference on Big Data and Computing | 10.1145/3220199.3220225                                                                                         | Non-cardiology focus       |
| August 2021 | Identification of Patients with Heart Failure in Large Datasets                                                                                                                                     | Kadosh, B. S.; Katz, S. D.; Blecker, S.                                                                                                             | 2020 | Heart Fail Clin                                                            | 10.1016/j.hfc.2020.05.001                                                                                       | Review/perspective article |
| August 2021 | Sociocultural Dimensions of Tracking Health and Taking Care                                                                                                                                         | Karthik S. Bhat; Neha Kumar                                                                                                                         | 2020 | Proc. ACM Hum.-Comput. Interact.                                           | 10.1145/3415200                                                                                                 | Review/perspective article |
| August 2021 | Using local lexicalized rules to identify heart disease risk factors in clinical notes                                                                                                              | Karystianis, G.; Dehghan, A.; Kovacevic, A.; Keane, J. A.; Nenadic, G.                                                                              | 2015 | J Biomed Inform                                                            | 10.1016/j.jbi.2015.06.013                                                                                       | Non-cardiology focus       |
| August 2021 | Underestimated prevalence of heart failure in hospital inpatients: a comparison of ICD codes and discharge letter information                                                                       | Kaspar, M.; Fette, G.; Gvøder, G.; Seidlmayer, L.; Ertl, M.; Dietrich, G.; Greger, H.; Puppe, F.; Stvørk, S.                                        | 2018 | Clin Res Cardiol                                                           | 10.1007/s00392-018-1245-z                                                                                       | No NLP focus/details       |
| August 2021 | Automated chart review utilizing natural language processing algorithm for asthma predictive index                                                                                                  | Kaur, H.; Sohn, S.; Wi, C. I.; Ryu, E.; Park, M. A.; Bachman, K.; Kita, H.; Croghan, I.; Castro-Rodriguez, J. A.; Voge, G. A.; Liu, H.; Juhn, Y. J. | 2018 | BMC Pulm Med                                                               | 10.1186/s12890-018-0593-9                                                                                       | Non-cardiology focus       |

|             |                                                                                                                                                        |                                                                                                                                 |      |                                                                                               |                                                                                                   |                            |
|-------------|--------------------------------------------------------------------------------------------------------------------------------------------------------|---------------------------------------------------------------------------------------------------------------------------------|------|-----------------------------------------------------------------------------------------------|---------------------------------------------------------------------------------------------------|----------------------------|
| August 2021 | A varied data shape and fidelity probing approach for assessing automated deep neural network-based cardiac magnetic resonance image sorting pipelines | Kawaji, Keigo; Maeda, Tsubasa; Tamura, Satoshi; Chauhan, Daksh; Patel, Amit; Goes, Jacob; Obioma, Blessing; Vaicik, Marcella K. | 2020 | Journal of Investigative Medicine                                                             | <a href="http://dx.doi.org/10.1136/jim-2020-MW.10">http://dx.doi.org/10.1136/jim-2020-MW.10</a>   | No NLP focus/details       |
| August 2021 | Generating Training Data for Concept-Mining for an 'Interface Terminology' Annotating Cardiology EHRs                                                  | Keloth, V. K.; Zhou, S.; Einstein, A. J.; Elhanan, G.; Chen, Y.; Geller, J.; Perl, Y.                                           | 2020 | Proceedings - 2020 IEEE International Conference on Bioinformatics and Biomedicine, BIBM 2020 | 10.1109/BIBM49941.2020.9313435                                                                    | No NLP focus/details       |
| August 2021 | Adapting existing natural language processing resources for cardiovascular risk factors identification in clinical notes                               | Khalifa, A.; Meystre, S.                                                                                                        | 2015 | J Biomed Inform                                                                               | 10.1016/j.jbi.2015.08.002                                                                         | Non-cardiology focus       |
| August 2021 | A two-stage big data analytics framework with real world applications using spark machine learning and long short-term memory network                  | Khan, M. A.; Karim, M. R.; Kim, Y.                                                                                              | 2018 | Symmetry                                                                                      | 10.3390/sym10100485                                                                               | No NLP focus/details       |
| August 2021 | Artificial Intelligence and Machine Learning in Cardiovascular Health Care                                                                             | Kilic, A.                                                                                                                       | 2020 | Ann Thorac Surg                                                                               | 10.1016/j.athoracsur.2019.09.042                                                                  | Review/perspective article |
| August 2021 | Classification of Contextual Use of Left Ventricular Ejection Fraction Assessments                                                                     | Kim, Y.; Garvin, J.; Goldstein, M. K.; Meystre, S. M.                                                                           | 2015 | Stud Health Technol Inform                                                                    |                                                                                                   | Duplicate                  |
| August 2021 | Validation of deep learning natural language processing algorithm for keyword extraction from pathology reports in electronic health records           | Kim, Y.; Lee, J. H.; Choi, S.; Lee, J. M.; Kim, J. H.; Seok, J.; Joo, H. J.                                                     | 2020 | Sci Rep                                                                                       | 10.1038/s41598-020-77258-w                                                                        | Non-cardiology focus       |
| August 2021 | A Study of Concept Extraction Across Different Types of Clinical Notes                                                                                 | Kim, Y.; Riloff, E.; Hurdle, J. F.                                                                                              | 2015 | AMIA Annu Symp Proc                                                                           |                                                                                                   | Non-cardiology focus       |
| August 2021 | All-cause and suicide mortality among lesbian, gay, and bisexual veterans who utilize care through the veterans health administration                  | Knight, S. J.; Lynch, K. E.; Viernes, B.; Gatsby, E.; DuVall, S. L.; Blosnich, J. R.                                            | 2020 | Health Services Research                                                                      | <a href="http://dx.doi.org/10.1111/1475-6773.13402">http://dx.doi.org/10.1111/1475-6773.13402</a> | Non-cardiology focus       |

|             |                                                                                                                                                                               |                                                                                                                                                                                                                                        |      |                                               |                                                                                                                       |                      |
|-------------|-------------------------------------------------------------------------------------------------------------------------------------------------------------------------------|----------------------------------------------------------------------------------------------------------------------------------------------------------------------------------------------------------------------------------------|------|-----------------------------------------------|-----------------------------------------------------------------------------------------------------------------------|----------------------|
| August 2021 | THE ADDITIONAL VALUE OF NATURAL LANGUAGE PROCESSING TO IDENTIFY DISEASE PREVALENCE BASED ON ELECTRONIC MEDICAL RECORD IMAGING REPORTS                                         | Kocyigit, Duygu; Milinovich, Alex; Lee, Chan M.; Hanna, Mazen; Gabrovesk, Andrej; Jin, Jian; Silverman, Micheal; Ahmad, Maleeha; Tang, W. H. Wilson; Grimm, Richard A.; Cho, Leslie; Griffin, Brian P.; Flamm, Scott D.; Kwon, Deborah | 2020 | Journal of the American College of Cardiology | <a href="http://dx.doi.org/10.1016/S0735-1097%2820%2934269-8">http://dx.doi.org/10.1016/S0735-1097%2820%2934269-8</a> | Abstract only        |
| August 2021 | PERFORMANCE AND ACCURACY OF NATURAL LANGUAGE PROCESSING TO IDENTIFY DISEASE ETIOLOGY FROM NON-STRUCTURED CARDIAC MAGNETIC RESONANCE IMAGING ELECTRONIC MEDICAL RECORD REPORTS | Kocyigit, Duygu; Milinovich, Alex; Lee, Chan M.; Silverman, Micheal; Ahmad, Maleeha; Hanna, Mazen; Gabrovesk, Andrej; Jin, Jian; Tang, W. H. Wilson; Grimm, Richard A.; Cho, Leslie; Griffin, Brian P.; Flamm, Scott D.; Kwon, Deborah | 2020 | Journal of the American College of Cardiology | <a href="http://dx.doi.org/10.1016/S0735-1097%2820%2934266-2">http://dx.doi.org/10.1016/S0735-1097%2820%2934266-2</a> | Abstract only        |
| August 2021 | Natural language processing of symptoms documented in free-text narratives of electronic health records: a systematic review                                                  | Koleck, T. A.; Dreisbach, C.; Bourne, P. E.; Bakken, S.                                                                                                                                                                                | 2019 | J Am Med Inform Assoc                         | 10.1093/jamia/ocy173                                                                                                  | Duplicate            |
| August 2021 | A systematic comparison of feature space effects on disease classifier performance for phenotype identification of five diseases                                              | Kotfila, C.; Uzuner, vñ                                                                                                                                                                                                                | 2015 | J Biomed Inform                               | 10.1016/j.jbi.2015.07.016                                                                                             | Non-cardiology focus |
| August 2021 | Finding Needles in the Haystack: Identifying Patients with Rare Subtype of Multiple Myeloma Supported by a Data Warehouse and Information Extraction                          | Krebs, J.; Bittrich, M.; Dietrich, G.; Ertl, M.; Fette, G.; Kaspar, M.; Liman, L.; Einsele, H.; Puppe, F.; Knop, S.                                                                                                                    | 2018 | Stud Health Technol Inform                    |                                                                                                                       | Non-cardiology focus |

|             |                                                                                                                         |                                                                                                                                                                   |      |                                                                                                                 |                                                                                                     |                      |
|-------------|-------------------------------------------------------------------------------------------------------------------------|-------------------------------------------------------------------------------------------------------------------------------------------------------------------|------|-----------------------------------------------------------------------------------------------------------------|-----------------------------------------------------------------------------------------------------|----------------------|
| August 2021 | Robustness evaluation of computer-aided clinical trials for medical devices                                             | Kuk Jin Jang; Yash Vardhan Pant; Bo Zhang; James Weimer; Rahul Mangharam                                                                                          | 2019 | Proceedings of the 10th ACM/IEEE International Conference on Cyber-Physical Systems                             | 10.1145/3302509.3311058                                                                             | Non-cardiology focus |
| August 2021 | Creation of a new longitudinal corpus of clinical narratives                                                            | Kumar, V.; Stubbs, A.; Shaw, S.; Uzuner, vñ                                                                                                                       | 2015 | J Biomed Inform                                                                                                 | 10.1016/j.jbi.2015.09.018                                                                           | Non-cardiology focus |
| August 2021 | SEMCARE: Multilingual Semantic Search in Semi-Structured Clinical Data                                                  | Lv≥pez-GarcV#a, P.; Kreuzthaler, M.; Schulz, S.; Scherr, D.; Daumke, P.; Markv≥, K.; Kors, J. A.; van Mulligen, E. M.; Wang, X.; Gonna, H.; Behr, E.; Honrado, vÅ | 2016 | Stud Health Technol Inform                                                                                      |                                                                                                     | Non-cardiology focus |
| August 2021 | Heart disease prediction using optimal name recognition based on deep learning models and whale optimization algorithms | Latha, U.; Velmurugan, T.                                                                                                                                         | 2019 | Journal of Advanced Research in Dynamical and Control Systems                                                   |                                                                                                     | Non-cardiology focus |
| August 2021 | Automated snomed ct mapping of clinical discharge summary data for cardiology queries in clinical facilities            | Latip, Abdul Aziz; Domingo, Ma Stella Tabora; Abd Rahim, Tengku Nurulhuda Tengku; Sulaiman, Ismat Mohd                                                            | 2020 | International Journal of Pharma Medicine and Biological Sciences                                                | <a href="http://dx.doi.org/10.18178/ijpmb.10.1.8-16">http://dx.doi.org/10.18178/ijpmb.10.1.8-16</a> | Outside date range   |
| August 2021 | An automated framework for predicting obstructive sleep apnea using a brief, daytime, non-intrusive test procedure      | Lauren Samy; Paul M. Macey; Nabil Alshurafa; Majid Sarrafzadeh                                                                                                    | 2015 | Proceedings of the 8th ACM International Conference on PErvasive Technologies Related to Assistive Environments | 10.1145/2769493.2769541                                                                             | Non-cardiology focus |



|             |                                                                                                                                                                                 |                                                                                                                                         |      |                                                                                                         |                                                                                                       |                      |
|-------------|---------------------------------------------------------------------------------------------------------------------------------------------------------------------------------|-----------------------------------------------------------------------------------------------------------------------------------------|------|---------------------------------------------------------------------------------------------------------|-------------------------------------------------------------------------------------------------------|----------------------|
| August 2021 | Unraveling Plant Natural Chemical Diversity for Drug Discovery Purposes                                                                                                         | Lautiv©, E.; Russo, O.; Ducrot, P.; Boutin, J. A.                                                                                       | 2020 | Frontiers in Pharmacology                                                                               | 10.3389/fphar.2020.00397                                                                              | Non-cardiology focus |
| August 2021 | Machine Learning-Based Data Mining Method for Sentiment Analysis of the Sewol Ferry Disaster's Effect on Social Stress                                                          | Lee, M. J.; Lee, T. R.; Lee, S. J.; Jang, J. S.; Kim, E. J.                                                                             | 2020 | Front Psychiatry                                                                                        | 10.3389/fpsy.2020.505673                                                                              | Non-cardiology focus |
| August 2021 | Deep Natural Language Processing to Identify Symptom Documentation in Clinical Notes for Patients With Heart Failure Undergoing Cardiac Resynchronization Therapy               | Leiter, R. E.; Santus, E.; Jin, Z.; Lee, K. C.; Yusuf, M.; Chien, I.; Ramaswamy, A.; Moseley, E. T.; Qian, Y.; Schrag, D.; Lindvall, C. | 2020 | J Pain Symptom Manage                                                                                   | 10.1016/j.jpain.2020.06.010                                                                           | Included             |
| August 2021 | An investigation of single-domain and multidomain medication and adverse drug event relation extraction from electronic health record notes using advanced deep learning models | Li, F.; Yu, H.                                                                                                                          | 2019 | J Am Med Inform Assoc                                                                                   | 10.1093/jamia/ocz018                                                                                  | Non-cardiology focus |
| August 2021 | Analysis of care pathway variation patterns in patient records                                                                                                                  | Li, X.; Mei, J.; Liu, H.; Yu, Y.; Xie, G.; Hu, J.; Wang, F.                                                                             | 2015 | Stud Health Technol Inform                                                                              |                                                                                                       | Non-cardiology focus |
| August 2021 | Coronary artery disease risk assessment from unstructured electronic health records using text mining                                                                           | Liaw, Siaw-Teng; Ray, Pradeep; Jonnagaddala, Jitendra; Kumar, Manish; Dai, Hong-Jie; Chang, Nai-Wen                                     | 2015 | Journal of Biomedical Informatics                                                                       | <a href="http://dx.doi.org/10.1016/j.jbi.2015.08.003">http://dx.doi.org/10.1016/j.jbi.2015.08.003</a> | Non-cardiology focus |
| August 2021 | Identification and Progression of Heart Disease Risk Factors in Diabetic Patients from Longitudinal Electronic Health Records                                                   | Liaw, Siaw-Teng; Ray, Pradeep; Jonnagaddala, Jitendra; Kumar, Manish; Dai, Hong-Jie; Hsu, Chien-Yeh                                     | 2015 | BioMed Research International                                                                           | <a href="http://dx.doi.org/10.1155/2015/636371">http://dx.doi.org/10.1155/2015/636371</a>             | Non-cardiology focus |
| August 2021 | Transcriptome Analysis on the Effect of Tartary Buckwheat Polysaccharide on the Liver of NAFLD-Model Mice                                                                       | Litao Zhang; Qiang Ren; Qian Chen                                                                                                       | 2020 | Proceedings of the Fourth International Conference on Biological Information and Biomedical Engineering | 10.1145/3403782.3403818                                                                               | No NLP focus/details |

|             |                                                                                                                                                                            |                                                                                                        |      |                                                                         |                                                                                                             |                            |
|-------------|----------------------------------------------------------------------------------------------------------------------------------------------------------------------------|--------------------------------------------------------------------------------------------------------|------|-------------------------------------------------------------------------|-------------------------------------------------------------------------------------------------------------|----------------------------|
| August 2021 | Computational network biology: Data, models, and applications                                                                                                              | Liu, C.; Ma, Y.; Zhao, J.; Nussinov, R.; Zhang, Y. C.; Cheng, F.; Zhang, Z. K.                         | 2020 | Physics Reports                                                         | 10.1016/j.physrrep.2019.12.004                                                                              | Review/perspective article |
| August 2021 | Constructing Large Scale Cohort for Clinical Study on Heart Failure with Electronic Health Record in Regional Healthcare Platform: Challenges and Strategies in Data Reuse | Liu, D.; Lei, L.; Ruan, T.; He, P.                                                                     | 2019 | Chinese Medical Sciences Journal                                        | 10.24920/003579                                                                                             | Review/perspective article |
| August 2021 | The pace, presentation, and profile of community-acquired sepsis and infection                                                                                             | Liu, V.; Bhimarao, M.; Greene, J. D.; Barreda, F.; Manickam, R.; Escobar, G.                           | 2020 | American Journal of Respiratory and Critical Care Medicine              |                                                                                                             | Non-cardiology focus       |
| August 2021 | Automatic de-identification of electronic medical records using token-level and character-level conditional random fields                                                  | Liu, Z.; Chen, Y.; Tang, B.; Wang, X.; Chen, Q.; Li, H.; Wang, J.; Deng, Q.; Zhu, S.                   | 2015 | J Biomed Inform                                                         | 10.1016/j.jbi.2015.06.009                                                                                   | Non-cardiology focus       |
| August 2021 | Using Natural Language Processing to Identify Patients with Immune Checkpoint Inhibitor-Associated Myocarditis                                                             | Lu, D. J.; Kamrava, M.; McArthur, H. L.; Reckamp, K.; Tamarappoo, B.; Atkins, K. M.                    | 2020 | International Journal of Radiation Oncology Biology Physics             | <a href="http://dx.doi.org/10.1016/j.ijrobp.2020.07.217">http://dx.doi.org/10.1016/j.ijrobp.2020.07.217</a> | Non-cardiology focus       |
| August 2021 | IMACS - an interactive cognitive assistant module for cardiac arrest cases in emergency medical service: demo abstract                                                     | M Arif Rahman; Sarah Preum; John A. Stankovic; Leon Jia; Eimara Mirza; Ronald Williams; Homa Alemzadeh | 2020 | Proceedings of the 18th Conference on Embedded Networked Sensor Systems | 10.1145/3384419.3430451                                                                                     | Non-cardiology focus       |
| August 2021 | Ensemble Empirical Mode Decomposition With Principal Component Analysis: A Novel Approach for Extracting Respiratory Rate and Heart Rate From Photoplethysmographic Signal | M. A. Motin; C. K. Karmakar; M. Palaniswami                                                            | 2018 | IEEE Journal of Biomedical and Health Informatics                       | 10.1109/JBHI.2017.2679108                                                                                   | No NLP focus/details       |
| August 2021 | Heart rate variability analysis for diagnosis of diabetic peripheral neuropathy                                                                                            | M. G. Morshed; M. A. Mukit; K. I. U. Ahmed; R. Mostafa; S. Parveen; A. H. Khandoker                    | 2020 | 2020 IEEE Region 10 Symposium (TENSYP)                                  | 10.1109/TENSYM.2020.9230736                                                                                 | Non-cardiology focus       |

|             |                                                                                                            |                                                                                                                 |      |                                                                                         |                                 |                      |
|-------------|------------------------------------------------------------------------------------------------------------|-----------------------------------------------------------------------------------------------------------------|------|-----------------------------------------------------------------------------------------|---------------------------------|----------------------|
| August 2021 | Fetal heart abnormality detection based on subspace separation and Wiener filtering                        | M. Gunarathne; W. Wansekara; G. Wimalarathna; G. Godaliyadda; M. Ekanayake; J. Wijayakulasooriya; R. Rathnayake | 2017 | 2017 IEEE International Conference on Industrial and Information Systems (ICIIS)        | 10.1109/ICIINFS.2017.8300349    | Non-cardiology focus |
| August 2021 | Cyclostationary analysis of ECG signals acquired inside an ultra-high field MRI scanner                    | M. Haritopoulos; J. Krug; A. Illanes; M. Friebe; A. K. Nandi                                                    | 2017 | 2017 25th European Signal Processing Conference (EUSIPCO)                               | 10.23919/EUSIPCO.2017.8081418   | No NLP focus/details |
| August 2021 | A visualization of evolving clinical sentiment using vector representations of clinical notes              | M. M. Ghassemi; R. G. Mark; S. Nemati                                                                           | 2015 | 2015 Computing in Cardiology Conference (CinC)                                          | 10.1109/CIC.2015.7410989        | Non-cardiology focus |
| August 2021 | A spatial data analysis infrastructure for environmental health research                                   | M. Mirto; S. Fiore; L. Conte; L. V. Bruno; G. Aloisio                                                           | 2016 | 2016 International Conference on High Performance Computing & Simulation (HPCS)         | 10.1109/HPCSim.2016.7568367     | No NLP focus/details |
| August 2021 | The role of waveform monitoring in Sepsis identification within the first hour of Intensive Care Unit stay | M. Mollura; G. Mantoan; S. Romano; L. W. Lehman; R. G. Mark; R. Barbieri                                        | 2020 | 2020 11th Conference of the European Study Group on Cardiovascular Oscillations (ESGCO) | 10.1109/ESGCO49734.2020.9158013 | Non-cardiology focus |

|             |                                                                                                                                      |                                                                                                                                                  |      |                                                                                                          |                                                                                                                 |                            |
|-------------|--------------------------------------------------------------------------------------------------------------------------------------|--------------------------------------------------------------------------------------------------------------------------------------------------|------|----------------------------------------------------------------------------------------------------------|-----------------------------------------------------------------------------------------------------------------|----------------------------|
| August 2021 | Prediction of Septic Shock Onset in ICU by Instantaneous Monitoring of Vital Signs                                                   | M. Mollura; S. Romano; G. Mantoan; L. w. Lehman; R. Barbieri                                                                                     | 2020 | 2020 42nd Annual International Conference of the IEEE Engineering in Medicine & Biology Society (EMBC)   | 10.1109/EMBC44109.2020.9176276                                                                                  | Non-cardiology focus       |
| August 2021 | Heart Rate Extraction from Photoplethysmography Signal: A Multi Model Machine Learning Approach                                      | M. S. Miah; S. S. Bashar; A. H. M. Z. Karim; Z. Hasan                                                                                            | 2020 | 2020 IEEE 2nd International Conference on Artificial Intelligence in Engineering and Technology (IICAET) | 10.1109/IICAET49801.2020.9257869                                                                                | No NLP focus/details       |
| August 2021 | Use of electronic medical records in development and validation of risk prediction models of hospital readmission: systematic review | Mahmoudi, E.; Kamdar, N.; Kim, N.; Gonzales, G.; Singh, K.; Waljee, A. K.                                                                        | 2020 | Bmj                                                                                                      | 10.1136/bmj.m958                                                                                                | Review/perspective article |
| August 2021 | Electronic Consultation for the Management of Atrial Fibrillation is Associated with Higher Healthcare Costs                         | Manning, Evan S.; Whittington, Melanie D.; Kirsh, Susan R.; Kenney, Rachael; ToddStenberg, Jeffrey; Au, David H.; Ho, Michael; Simonetti, Joseph | 2020 | Circulation                                                                                              | <a href="http://dx.doi.org/10.1161/circ.142.suppl_3.13412">http://dx.doi.org/10.1161/circ.142.suppl_3.13412</a> | Abstract only              |
| August 2021 | Network Structures and Dynamics Of Early Dementia Events Recorded in Primary Care Electronic Health Records                          | Maxine Mackintosh; Arturo Gonzalez-Izquierdo; Martin Rossor; Kirstie Whitaker; Kenan Direk; Spiros Denaxas                                       | 2019 | Proceedings of the 9th International Conference on Digital Public Health                                 | 10.1145/3357729.3357757                                                                                         | Non-cardiology focus       |

|             |                                                                                                                                                            |                                                                                                                                                                                                                     |      |                                                                       |                                                                                               |                            |
|-------------|------------------------------------------------------------------------------------------------------------------------------------------------------------|---------------------------------------------------------------------------------------------------------------------------------------------------------------------------------------------------------------------|------|-----------------------------------------------------------------------|-----------------------------------------------------------------------------------------------|----------------------------|
| August 2021 | A Supervised Learning Approach for Robust Health Monitoring using Face Videos                                                                              | Mayank Gupta; Lingjun Chen; Denny Yu; Vaneet Aggarwal                                                                                                                                                               | 2020 | Proceedings of the 2nd ACM Workshop on Device-Free Human Sensing      | 10.1145/3427772.3429392                                                                       | Non-cardiology focus       |
| August 2021 | Implementing Artificial Intelligence and Digital Health in Resource-Limited Settings? Top 10 Lessons We Learned in Congenital Heart Defects and Cardiology | Mazandu, Gaston Kuzamunu; Agamah, Francis Edem; Chimusa, Emile; Dandara, Collet; Wonkam, Ambroise; Thomford, Nicholas Ekow; Bope, Christian Domilongo; Ntumba, Simon Badibanga; Dzobo, Kevin; Owusu Ateko, Richmond | 2020 | OMICS A Journal of Integrative Biology                                | <a href="http://dx.doi.org/10.1089/omi.2019.0142">http://dx.doi.org/10.1089/omi.2019.0142</a> | Review/perspective article |
| August 2021 | Prevalence and incidence of clinical outcomes in patients presenting to secondary mental health care with mood instability and sleep disturbance           | McDonald, K.; Smith, T.; Broadbent, M.; Patel, R.; Geddes, J. R.; Saunders, K. E. A.                                                                                                                                | 2020 | Eur Psychiatry                                                        | 10.1192/j.eurpsy.2020.39                                                                      | Non-cardiology focus       |
| August 2021 | Use of text-mining methods to improve efficiency in the calculation of drug exposure to support pharmacoepidemiology studies                               | McTaggart, S.; Nangle, C. Caldwell, J.; Alvarez-Madrado, S.; Colhoun, H.; Bennie, M.                                                                                                                                | 2018 | Int J Epidemiol                                                       | 10.1093/ije/dyx264                                                                            | Non-cardiology focus       |
| August 2021 | Understanding the Comorbidity of Multiple Chronic Diseases Using a Network Approach                                                                        | Md Ekramul Hossain; Arif khan; Shahadat Uddin                                                                                                                                                                       | 2019 | Proceedings of the Australasian Computer Science Week Multiconference | 10.1145/3290688.3290730                                                                       | Non-cardiology focus       |

|             |                                                                                                                                                    |                                                                                              |      |                                                                                                      |                                                                               |                      |
|-------------|----------------------------------------------------------------------------------------------------------------------------------------------------|----------------------------------------------------------------------------------------------|------|------------------------------------------------------------------------------------------------------|-------------------------------------------------------------------------------|----------------------|
| August 2021 | Automated classification of congestive heart failure severity using time domain, frequency domain and non-linear heart rate variability measures   | Mehrin Gilani; Mikael Eklund                                                                 | 2015 | Proceedings of the 25th Annual International Conference on Computer Science and Software Engineering |                                                                               | No NLP focus/details |
| August 2021 | Congestive heart failure information extraction framework for automated treatment performance measures assessment                                  | Meystre, S. M.; Kim, Y.; Gobbel, G. T.; Matheny, M. E.; Redd, A.; Bray, B. E.; Garvin, J. H. | 2017 | J Am Med Inform Assoc                                                                                | 10.1093/jamia/ocw097                                                          | Duplicate            |
| August 2021 | Heart Failure Medications Detection and Prescription Status Classification in Clinical Narrative Documents                                         | Meystre, S. M.; Kim, Y.; Heavirland, J.; Williams, J.; Bray, B. E.; Garvin, J.               | 2015 | Stud Health Technol Inform                                                                           |                                                                               | Duplicate            |
| August 2021 | Clinically Comprehensible Clustering of Change in Time Series: The C4TS Algorithm                                                                  | Michael Merry; Johan Van Schalkwyk; David Cumin; Jim Warren                                  | 2019 | Proceedings of the Australasian Computer Science Week Multiconference                                | 10.1145/3290688.3290723                                                       | No NLP focus/details |
| August 2021 | Automatic Extraction of Risk Factors for Dialysis Patients from Clinical Notes Using Natural Language Processing Techniques                        | Michalopoulos, G.; Qazi, H.; Wong, A.; Butt, Z.; Chen, H.                                    | 2020 | Stud Health Technol Inform                                                                           | 10.3233/shti200121                                                            | Non-cardiology focus |
| August 2021 | Low testosterone on social media: Application of natural language processing to understand patients' perceptions of hypogonadism and its treatment | Mills, Jesse Nelson; Osadchiy, Vadim; Jiang, Tommy; Eleswarapu, Sriram Venkata               | 2020 | Journal of Medical Internet Research                                                                 | <a href="http://dx.doi.org/10.2196/21383">http://dx.doi.org/10.2196/21383</a> | Duplicate            |

|             |                                                                                                  |                                                                                   |      |                                                                                                                                                                                        |                         |                      |
|-------------|--------------------------------------------------------------------------------------------------|-----------------------------------------------------------------------------------|------|----------------------------------------------------------------------------------------------------------------------------------------------------------------------------------------|-------------------------|----------------------|
| August 2021 | OfficeBP: noninvasive continuous blood pressure monitoring based on PPT in office environment    | Mingzhe Guo; Hongbo Ni; Alex Q. Chen                                              | 2020 | Adjunct Proceedings of the 2020 ACM International Joint Conference on Pervasive and Ubiquitous Computing and Proceedings of the 2020 ACM International Symposium on Wearable Computers | 10.1145/3410530.3414398 | No NLP focus/details |
| August 2021 | Comparative Analysis of Statistical Methods for Estimating Hurst Exponent                        | Mitko Gospodinov; Evgeniya Gospodinova; Ekaterina Popovska                        | 2020 | Proceedings of the 21st International Conference on Computer Systems and Technologies '20                                                                                              | 10.1145/3407982.3408012 | No NLP focus/details |
| August 2021 | Textual analysis of collaboration notes of the telemedical heart failure network HerzMobil Tirol | Modre-Osprian, R.; Gruber, K.; Kreiner, K.; Schreier, G.; Poelzl, G.; Kastner, P. | 2015 | Stud Health Technol Inform                                                                                                                                                             |                         | No NLP focus/details |
| August 2021 | Machine Learning Approach for Motion Artifact Detection in Ballistocardiogram Signals            | Moein Enayati; Nasibeh Zanjirani Farahani; Marjorie Skubic                        | 2020 | Proceedings of the 14th EAI International Conference on Pervasive Computing Technologies for Healthcare                                                                                | 10.1145/3421937.3421970 | No NLP focus/details |

|             |                                                                                                                                  |                                                                                                                                                                                             |      |                                                                                                                         |                                |                      |
|-------------|----------------------------------------------------------------------------------------------------------------------------------|---------------------------------------------------------------------------------------------------------------------------------------------------------------------------------------------|------|-------------------------------------------------------------------------------------------------------------------------|--------------------------------|----------------------|
| August 2021 | Knowledge transfer from experts to novices in minimally invasive catheter mediated (MIC) interventions, eye-tracking study       | Mohammad Al-Naser; Peter Lanzer; Andreas Dengel; Syed Saqib Bukhari; Seyyed Saleh Mozaffari Chanijani                                                                                       | 2016 | Proceedings of the 18th International Conference on Human-Computer Interaction with Mobile Devices and Services Adjunct | 10.1145/2957265.2965013        | No NLP focus/details |
| August 2021 | An Approach of Predicting Heart Disease Using a Hybrid Neural Network and Decision Tree                                          | Mohammad Ali Hassani; Ran Tao; Marjan Kamyab; Mohammad Hadi Mohammadi                                                                                                                       | 2020 | Proceedings of the 2020 5th International Conference on Big Data and Computing                                          | 10.1145/3404687.3404704        | No NLP focus/details |
| August 2021 | Automated extraction of sudden cardiac death risk factors in hypertrophic cardiomyopathy patients by natural language processing | Moon, S.; Liu, S.; Scott, C. G.; Samudrala, S.; Abidian, M. M.; Geske, J. B.; Noseworthy, P. A.; Shellum, J. L.; Chaudhry, R.; Ommen, S. R.; Nishimura, R. A.; Liu, H.; Arruda-Olson, A. M. | 2019 | Int J Med Inform                                                                                                        | 10.1016/j.ijmedinf.2019.05.008 | Non-cardiology focus |
| August 2021 | Sarcopenia, frailty and cachexia patients detected in a multisystem electronic health record database                            | Moorthi, R. N.; Liu, Z.; El-Azab, S. A.; Lembcke, L. R.; Miller, M. R.; Broyles, A. A.; Imel, E. A.                                                                                         | 2020 | BMC Musculoskelet Disord                                                                                                | 10.1186/s12891-020-03522-9     | Non-cardiology focus |
| August 2021 | Computer Aided Detection of Normal and Abnormal Heart Sound using PCG                                                            | Muhammad Fahad Khan; Maliha Atteeq; Adnan N. Qureshi                                                                                                                                        | 2019 | Proceedings of the 2019 11th International Conference on Bioinformatics and Biomedical Technology                       | 10.1145/3340074.3340086        | No NLP focus/details |



|             |                                                                                                                                   |                                                                                                          |      |                                                                                                  |                                  |                            |
|-------------|-----------------------------------------------------------------------------------------------------------------------------------|----------------------------------------------------------------------------------------------------------|------|--------------------------------------------------------------------------------------------------|----------------------------------|----------------------------|
| August 2021 | New Approach for Currents Assessment in Single Ion Channels of Cardiac Cells Nuclei                                               | N. Ivanushkina; K. Ivanko; A. Kotliarova; O. Kotyk; V. Lukianenko; I. Nesteruk; V. Timofeyev; B. Zadokha | 2020 | 2020 IEEE 40th International Conference on Electronics and Nanotechnology (ELNANO)               | 10.1109/ELNANO50318.2020.9088751 | No NLP focus/details       |
| August 2021 | Explanatory Analysis of a Machine Learning Model to Identify Hypertrophic Cardiomyopathy Patients from EHR Using Diagnostic Codes | N. Z. Farahani; D. S. B. Sundaram; M. Enayati; S. P. Arunachalam; K. Pasupathy; A. M. Arruda-Olson       | 2020 | 2020 IEEE International Conference on Bioinformatics and Biomedicine (BIBM)                      | 10.1109/BIBM49941.2020.9313231   | No NLP focus/details       |
| August 2021 | The Automatic Repairing Method Addressing Clipping Distortions and Frictional Noises in Electronic Stethoscope                    | N. Zhou; J. Wang; B. Sun; R. Liu; N. Hu                                                                  | 2019 | 2019 IEEE 7th International Conference on Bioinformatics and Computational Biology (ICBCB)       | 10.1109/ICBCB.2019.8854669       | No NLP focus/details       |
| August 2021 | Multiscale classification of heart failure phenotypes by unsupervised clustering of unstructured electronic medical record data   | Nagamine, T.; Gillette, B.; Pakhomov, A.; Kahoun, J.; Mayer, H.; Burghaus, R.; Lippert, J.; Saxena, M.   | 2020 | Sci Rep                                                                                          | 10.1038/s41598-020-77286-6       | No NLP focus/details       |
| August 2021 | Swarm intelligence and data mining: a review of literature and applications in healthcare                                         | Nandini Nayar; Sachin Ahuja; Shaily Jain                                                                 | 2019 | Proceedings of the Third International Conference on Advanced Informatics for Computing Research | 10.1145/3339311.3339323          | Review/perspective article |
| August 2021 | A Natural Language Processing Tool for Large-Scale Data Extraction from Echocardiography Reports                                  | Nath, C.; Albaghdadi, M. S.; Jonnalagadda, S. R.                                                         | 2016 | PLoS One                                                                                         | 10.1371/journal.pone.0153749     | Duplicate                  |

|             |                                                                                                                                                    |                                                                                               |      |                                                                                                       |                                                                                                               |                      |
|-------------|----------------------------------------------------------------------------------------------------------------------------------------------------|-----------------------------------------------------------------------------------------------|------|-------------------------------------------------------------------------------------------------------|---------------------------------------------------------------------------------------------------------------|----------------------|
| August 2021 | A Survey of Challenges and Opportunities in Sensing and Analytics for Risk Factors of Cardiovascular Disorders                                     | Nathan C. Hurley; Erica S. Spatz; Harlan M. Krumholz; Roozbeh Jafari; Bobak J. Mortazavi      | 2021 | ACM Trans. Comput. Healthcare                                                                         | 10.1145/3417958                                                                                               | Abstract only        |
| August 2021 | Using clinical data text-mining analysis to examine the association between androgen deprivation therapy and depression                            | Nead, Kevin T.; Gaskin, Gregory L.; Chester, Cariad; Leeper, Nicholas J.; Shah, Nigam H.      | 2015 | Journal of Clinical Oncology                                                                          |                                                                                                               | Non-cardiology focus |
| August 2021 | Text-mining methods applied to clinical records support an association between androgen deprivation therapy and subsequent cardiometabolic disease | Nead, Kevin T.; Gaskin, Gregory L.; Chester, Cariad; Shah, Nigam H.; Leeper, Nicholas J.      | 2015 | Cancer Research                                                                                       | <a href="http://dx.doi.org/10.1158/1538-7445.AM2015-5577">http://dx.doi.org/10.1158/1538-7445.AM2015-5577</a> | Non-cardiology focus |
| August 2021 | Efficient Heart Disease Prediction System using K-Nearest Neighbor Classification Technique                                                        | Nida Khateeb; Muhammad Usman                                                                  | 2017 | Proceedings of the International Conference on Big Data and Internet of Thing                         | 10.1145/3175684.3175703                                                                                       | No NLP focus/details |
| August 2021 | How do Twitter, Wikipedia, and Harrison's principles of medicine describe heart attacks?                                                           | Nikhil Devraj; Michael Chary                                                                  | 2015 | Proceedings of the 6th ACM Conference on Bioinformatics, Computational Biology and Health Informatics | 10.1145/2808719.2812591                                                                                       | Duplicate            |
| August 2021 | Cross-Modal Health State Estimation                                                                                                                | Nitish Nag; Vaibhav Pandey; Preston J. Putzel; Hari Bhimaraju; Srikanth Krishnan; Ramesh Jain | 2018 | Proceedings of the 26th ACM international conference on Multimedia                                    | 10.1145/3240508.3241913                                                                                       | No NLP focus/details |

|             |                                                                                                                                                                                       |                                                                                                                      |      |                                                                                                        |                                |                      |
|-------------|---------------------------------------------------------------------------------------------------------------------------------------------------------------------------------------|----------------------------------------------------------------------------------------------------------------------|------|--------------------------------------------------------------------------------------------------------|--------------------------------|----------------------|
| August 2021 | Inter-Patient ECG Classification with Symbolic Representations and Multi-Perspective Convolutional Neural Networks                                                                    | Niu, J.; Tang, Y.; Sun, Z.; Zhang, W.                                                                                | 2020 | IEEE Journal of Biomedical and Health Informatics                                                      | 10.1109/JBHI.2019.2942938      | No NLP focus/details |
| August 2021 | Limited alignment of publicly competitive disease funding with disease burden in Japan                                                                                                | Nomura, S.; Yoneoka, D.; Tanaka, S.; Makuuchi, R.; Sakamoto, H.; Ishizuka, A.; Nakamura, H.; Kubota, A.; Shibuya, K. | 2020 | PLoS One                                                                                               | 10.1371/journal.pone.0228542   | Non-cardiology focus |
| August 2021 | Detection of Signs of Cardiovascular System Ischemic Episodes in the Conditions of Person's Daily Activities                                                                          | Olga Melnik                                                                                                          | 2017 | Proceedings of the 9th International Conference on Bioinformatics and Biomedical Technology            | 10.1145/3093293.3093313        | Non-cardiology focus |
| August 2021 | Low testosterone on social media: Application of natural language processing to understand patients' perceptions of hypogonadism                                                      | Osadchiy, Vadim; Mills, Jesse; Eleswarapu, Sriram                                                                    | 2020 | Journal of Urology                                                                                     |                                | Non-cardiology focus |
| August 2021 | Potential Prognostic Markers in the Heart Rate Variability Features for Early Diagnosis of Sepsis in the Pediatric Intensive Care Unit using Convolutional Neural Network Classifiers | P. Amiri; H. Abbasi; A. Derakhshan; B. Gharib; B. Nooralishahi; M. Mirzaaghayan                                      | 2020 | 2020 42nd Annual International Conference of the IEEE Engineering in Medicine & Biology Society (EMBC) | 10.1109/EMBC44109.2020.9175481 | Non-cardiology focus |
| August 2021 | An Algorithm for Heart Rate Extraction From Acoustic Recordings at the Neck                                                                                                           | P. Sharma; S. A. Imtiaz; E. Rodriguez-Villegas                                                                       | 2019 | IEEE Transactions on Biomedical Engineering                                                            | 10.1109/TBME.2018.2836187      | No NLP focus/details |
| August 2021 | In heart failure, adding empagliflozin to medical therapy reduced a composite of CV death or HF hospitalization                                                                       | Palaskas, N. L.; Deswal, A.                                                                                          | 2020 | Ann Intern Med                                                                                         | 10.7326/acpj202011170-051      | No NLP focus/details |

|             |                                                                                                                                                                         |                                                                                                                                                                                    |      |                                                                                       |                              |                      |
|-------------|-------------------------------------------------------------------------------------------------------------------------------------------------------------------------|------------------------------------------------------------------------------------------------------------------------------------------------------------------------------------|------|---------------------------------------------------------------------------------------|------------------------------|----------------------|
| August 2021 | Design Opportunities for Supporting Elderly in India in Managing their Health and Fitness Post-COVID-19                                                                 | Pallavi Rao; Anirudha Joshi                                                                                                                                                        | 2020 | IndiaHCI '20: Proceedings of the 11th Indian Conference on Human-Computer Interaction | 10.1145/3429290.3429294      | Non-cardiology focus |
| August 2021 | Using EHRs and Machine Learning for Heart Failure Survival Analysis                                                                                                     | Panahiazar, M.; Taslimitehrani, V.; Pereira, N.; Pathak, J.                                                                                                                        | 2015 | Stud Health Technol Inform                                                            |                              | No NLP focus/details |
| August 2021 | Extraction of radiographic findings from unstructured thoracoabdominal computed tomography reports using convolutional neural network based natural language processing | Pandey, M.; Xu, Z.; Sholle, E.; Maliakal, G.; Singh, G.; Fatima, Z.; Larine, D.; Lee, B. C.; Wang, J.; van Rosendaal, A. R.; Baskaran, L.; Shaw, L. J.; Min, J. K.; Al'Aref, S. J. | 2020 | PLoS One                                                                              | 10.1371/journal.pone.0236827 | Non-cardiology focus |
| August 2021 | Detecting conversation topics in primary care office visits from transcripts of patient-provider interactions                                                           | Park, J.; Kotzias, D.; Kuo, P.; Logan IV, R. L.; Merced, K.; Singh, S.; Tanana, M.; Karra Taniskidou, E.; Lafata, J. E.; Atkins, D. C.; Tai-Seale, M.; Imel, Z. E.; Smyth, P.      | 2019 | J Am Med Inform Assoc                                                                 | 10.1093/jamia/ocz140         | Non-cardiology focus |
| August 2021 | Development and Evaluation of a Case-Based Retrieval Service                                                                                                            | Pasche, E.; Chinali, M.; Gobeill, J.; Ruch, P.                                                                                                                                     | 2017 | Stud Health Technol Inform                                                            |                              | Non-cardiology focus |
| August 2021 | Assessing Information Congruence of Documented Cardiovascular Disease between Electronic Dental and Medical Records                                                     | Patel, J.; Mowery, D.; Krishnan, A.; Thyvalikakath, T.                                                                                                                             | 2018 | AMIA Annu Symp Proc                                                                   |                              | Non-cardiology focus |

|             |                                                                                                                                                                                      |                                                                                                                                                                          |      |                                                                              |                                                                                                             |                      |
|-------------|--------------------------------------------------------------------------------------------------------------------------------------------------------------------------------------|--------------------------------------------------------------------------------------------------------------------------------------------------------------------------|------|------------------------------------------------------------------------------|-------------------------------------------------------------------------------------------------------------|----------------------|
| August 2021 | Development and validation of a heart failure with preserved ejection fraction cohort using electronic medical records                                                               | Patel, Y. R.; Robbins, J. M.; Kurgansky, K. E.; Imran, T.; Orkaby, A. R.; McLean, R. R.; Ho, Y. L.; Cho, K.; Michael Gaziano, J.; Djousse, L.; Gagnon, D. R.; Joseph, J. | 2018 | BMC Cardiovasc Disord                                                        | 10.1186/s12872-018-0866-5                                                                                   | Duplicate            |
| August 2021 | Extraction of Vital Signs from Clinical Notes                                                                                                                                        | Patterson, O. V.; Jones, M.; Yao, Y.; Viernes, B.; Alba, P. R.; Iwashyna, T. J.; DuVall, S. L.                                                                           | 2015 | Stud Health Technol Inform                                                   |                                                                                                             | Non-cardiology focus |
| August 2021 | Neural Networks for Cause of Hospitalization and Final Cause of Death Extraction from Discharge Summaries                                                                            | Peper, F. E.; Cardone, M. B.; Esteban, S.                                                                                                                                | 2020 | Stud Health Technol Inform                                                   | 10.3233/shti200432                                                                                          | Abstract only        |
| August 2021 | Home Health Care: Nurse-Physician Communication, Patient Severity, and Hospital Readmission                                                                                          | Pesko, M. F.; Gerber, L. M.; Peng, T. R.; Press, M. J.                                                                                                                   | 2018 | Health Serv Res                                                              | 10.1111/1475-6773.12667                                                                                     | Non-cardiology focus |
| August 2021 | Common Barriers to the Use of Patient-Generated Data Across Clinical Settings                                                                                                        | Peter West; Max Van Kleek; Richard Giordano; Mark J. Weal; Nigel Shadbolt                                                                                                | 2018 | Proceedings of the 2018 CHI Conference on Human Factors in Computing Systems | 10.1145/3173574.3174058                                                                                     | No NLP focus/details |
| August 2021 | Can Alexa, Cortana, Google Assistant and Siri save your life? A mixed-methods analysis of virtual digital assistants and their responses to first aid and basic life support queries | Picard, Christopher; Smith, Katherine Elizabeth; Picard, Kelly; Douma, Matthew John                                                                                      | 2020 | BMJ Innovations                                                              | <a href="http://dx.doi.org/10.1136/bmjinnov-2018-000326">http://dx.doi.org/10.1136/bmjinnov-2018-000326</a> | Non-cardiology focus |
| August 2021 | Can donor narratives yield insights? A natural language processing proof of concept to facilitate kidney allocation                                                                  | Placona, A. M.; Martinez, C.; McGehee, H.; Carrico, B.; Klassen, D. K.; Stewart, D.                                                                                      | 2020 | Am J Transplant                                                              | 10.1111/ajt.15705                                                                                           | Non-cardiology focus |
| August 2021 | Impact of guidelines for the management of minor head injury on the utilization and diagnostic yield of CT over two decades, using natural language processing in a large dataset    | Pons, E.; Foks, K. A.; Dippel, D. W. J.; Hunink, M. G. M.                                                                                                                | 2019 | Eur Radiol                                                                   | 10.1007/s00330-018-5954-5                                                                                   | Non-cardiology focus |

|             |                                                                                            |                                                                        |      |                                                                                                                                      |                              |                      |
|-------------|--------------------------------------------------------------------------------------------|------------------------------------------------------------------------|------|--------------------------------------------------------------------------------------------------------------------------------------|------------------------------|----------------------|
| August 2021 | Automatic Severity Classification of Coronary Artery Disease via Recurrent Capsule Network | Q. Wang; J. Qiu; Y. Zhou; T. Ruan; D. Gao; J. Gao                      | 2018 | 2018 IEEE International Conference on Bioinformatics and Biomedicine (BIBM)                                                          | 10.1109/BIBM.2018.8621136    | Abstract only        |
| August 2021 | Deep Cardiovascular Disease Prediction with Risk Factors Powered Bi-attention              | Qiu, Y.; Zhang, Z.; Qin, X.; Tao, S.                                   | 2020 | Lecture Notes in Computer Science (including subseries Lecture Notes in Artificial Intelligence and Lecture Notes in Bioinformatics) | 10.1007/978-3-030-63830-6_60 | Non-cardiology focus |
| August 2021 | Artherosclerosis risk assessment using reynold risk calculator                             | R. George; T. George; R. B. Haritha                                    | 2016 | 2016 International Conference on Circuit, Power and Computing Technologies (ICCPCT)                                                  | 10.1109/ICCPCT.2016.7530200  | No NLP focus/details |
| August 2021 | On the Feasibility of Flow-Guided Nanocommunication Networks for some Medical Applications | Rafael Asorey-Cacheda; Antonio-Javier Garcia-Sanchez; Joan Garcia-Haro | 2020 | Proceedings of the 1st ACM International Workshop on Nanoscale Computing, Communication, and Applications                            | 10.1145/3416006.3431275      | No NLP focus/details |

|             |                                                                                                                                                    |                                                                                                                                      |      |                                                                                               |                                  |                      |
|-------------|----------------------------------------------------------------------------------------------------------------------------------------------------|--------------------------------------------------------------------------------------------------------------------------------------|------|-----------------------------------------------------------------------------------------------|----------------------------------|----------------------|
| August 2021 | BVS-Vis: a web-based visualizer for BloodVoyagerS                                                                                                  | Regine Wendt; Chris Deter; Stefan Fischer                                                                                            | 2020 | Proceedings of the 7th ACM International Conference on Nanoscale Computing and Communication  | 10.1145/3411295.3411300          | Abstract only        |
| August 2021 | Corpus Construction of Precision Medicine                                                                                                          | Ren, X.; An, X.; Fan, S.                                                                                                             | 2020 | ACM International Conference Proceeding Series                                                | 10.1145/3386052.3386069          | Non-cardiology focus |
| August 2021 | Adverse Drug Reaction Detection in Social Media by Deepm Learning Methods                                                                          | Rezaei, Z.; Ebrahimpour-Komleh, H.; Eslami, B.; Chavoshinejad, R.; Totonchi, M.                                                      | 2020 | Cell J                                                                                        | 10.22074/cellj.2020.6615         | Non-cardiology focus |
| August 2021 | FILLET-Platform for Intelligent Nutrition                                                                                                          | Ribeiro, D.; Costa, J.; Lopes, I.; Barbosa, T.; Soares, C.; Sousa, F.; Ribeiro, J.; Rocha, D.; Silva, M.                             | 2020 | Proceedings of IEEE/ACS International Conference on Computer Systems and Applications, AICCSA | 10.1109/AICCSA50499.2020.9316490 | Non-cardiology focus |
| August 2021 | Hospitalizations for heart failure among patients with reduced renal function treated withmetformin or sulfonylureas: A retrospective cohort study | Richardson, Tadarro L.; Hackstadt, Amber; Hung, Adriana M.; Greevy, Robert; Grijalva, Carlos; Griffin, Marie; Roumie, Christianne L. | 2020 | Circulation: Cardiovascular Quality and Outcomes                                              |                                  | No NLP focus/details |
| August 2021 | Deep Learning Approaches Outperform Conventional Strategies in De-Identification of German Medical Reports                                         | Richter-Pechanski, P.; Amr, A.; Katus, H. A.; Dieterich, C.                                                                          | 2019 | Stud Health Technol Inform                                                                    | 10.3233/shti190813               | Non-cardiology focus |
| August 2021 | De-Identification of German Medical Admission Notes                                                                                                | Richter-Pechanski, P.; Riezler, S.; Dieterich, C.                                                                                    | 2018 | Stud Health Technol Inform                                                                    |                                  | Non-cardiology focus |

|             |                                                                                                            |                                                                                                                                                                                                                                            |      |                                                                                        |                                                                                                             |                      |
|-------------|------------------------------------------------------------------------------------------------------------|--------------------------------------------------------------------------------------------------------------------------------------------------------------------------------------------------------------------------------------------|------|----------------------------------------------------------------------------------------|-------------------------------------------------------------------------------------------------------------|----------------------|
| August 2021 | 1st-degree Atrioventricular (AV-block) and Bundle Branch Block Prediction using Machine Learning           | Risul Islam Rasel; Nasrin Sultana; Phayung Meesad; Anupam Chowdhury; Meherab Hossain                                                                                                                                                       | 2020 | Proceedings of the 11th International Conference on Advances in Information Technology | 10.1145/3406601.3406647                                                                                     | No NLP focus/details |
| August 2021 | Secure key-exchange protocol for implants using heartbeats                                                 | Robert M. Seepers; Jos H. Weber; Zekeriya Erkin; Ioannis Sourdis; Christos Strydis                                                                                                                                                         | 2016 | Proceedings of the ACM International Conference on Computing Frontiers                 | 10.1145/2903150.2903165                                                                                     | No NLP focus/details |
| August 2021 | The role of fine-grained annotations in supervised recognition of risk factors for heart disease from EHRs | Roberts, K.; Shooshan, S. E.; Rodriguez, L.; Abhyankar, S.; Kilicoglu, H.; Demner-Fushman, D.                                                                                                                                              | 2015 | J Biomed Inform                                                                        | 10.1016/j.jbi.2015.06.010                                                                                   | Non-cardiology focus |
| August 2021 | Machine Learning of the Electrocardiogram to Detect Regional Structural Abnormalities of the Heart         | Rogers, Albert J.; Tooley, James; Thakkar, Vyom; Torres, Jessica; Xu, Justin; Bhatia, Neal K.; Tung, Jagteshwar; Alhusseini, Mahmood; Baykaner, Tina; Clifford, Gari; Zaharia, Matei; Ashley, Euan A.; Perez, Marco V.; Narayan, Sanjiv M. | 2020 | Circulation                                                                            | <a href="http://dx.doi.org/10.1161/circ.142.suppl_3.311">http://dx.doi.org/10.1161/circ.142.suppl_3.311</a> | No NLP focus/details |
| August 2021 | Informatics and computational methods in natural product drug discovery: A review and perspectives         | Romano, J. D.; Tatonetti, N. P.                                                                                                                                                                                                            | 2019 | Frontiers in Genetics                                                                  | 10.3389/fgene.2019.00368                                                                                    | Non-cardiology focus |



|             |                                                                                                                                                 |                                                                                                             |      |                                                                                            |                                   |                            |
|-------------|-------------------------------------------------------------------------------------------------------------------------------------------------|-------------------------------------------------------------------------------------------------------------|------|--------------------------------------------------------------------------------------------|-----------------------------------|----------------------------|
| August 2021 | Vallum-Med: Protecting Medical Data in Cloud Environments                                                                                       | Ronny Peterson; Altigran da Silva; Andrv© Carvalho; Christof Fetzter; Andrv© Martin; Ignacio Blanquer       | 2020 | Proceedings of the 29th ACM International Conference on Information & Knowledge Management | 10.1145/3340531.3417421           | Non-cardiology focus       |
| August 2021 | Physical Literacy - A Journey of Individual Enrichment: An Ecological Dynamics Rationale for Enhancing Performance and Physical Activity in All | Rudd, J. R.; Pesce, C.; Strafford, B. W.; Davids, K.                                                        | 2020 | Front Psychol                                                                              | 10.3389/fpsyg.2020.01904          | Non-cardiology focus       |
| August 2021 | Association of Online Consumer Reviews of Skilled Nursing Facilities With Patient Rehospitalization Rates                                       | Ryskina, K. L.; Andy, A. U.; Manges, K. A.; Foley, K. A.; Werner, R. M.; Merchant, R. M.                    | 2020 | JAMA Netw Open                                                                             | 10.1001/jamanetworkopen.2020.4682 | Non-cardiology focus       |
| August 2021 | A Review of Automated Methods for Detection of Myocardial Ischemia and Infarction Using Electrocardiogram and Electronic Health Records         | S. Ansari; N. Farzaneh; M. Duda; K. Horan; H. B. Andersson; Z. D. Goldberger; B. K. Nallamothu; K. Najarian | 2017 | IEEE Reviews in Biomedical Engineering                                                     | 10.1109/RBME.2017.2757953         | Review/perspective article |
| August 2021 | Stabilizing High-Dimensional Prediction Models Using Feature Graphs                                                                             | S. Gopakumar; T. Tran; T. D. Nguyen; D. Phung; S. Venkatesh                                                 | 2015 | IEEE Journal of Biomedical and Health Informatics                                          | 10.1109/JBHI.2014.2353031         | No NLP focus/details       |
| August 2021 | Non-redundant association rules between diseases and medications: an automated method for knowledge base construction                           | Sv©verac, F.; Sauleau, E. A.; Meyer, N.; Lefv®vre, H.; Nisand, G.; Jay, N.                                  | 2015 | BMC Med Inform Decis Mak                                                                   | 10.1186/s12911-015-0151-9         | No NLP focus/details       |
| August 2021 | Prediction of venous thromboembolism using semantic and sentiment analyses of clinical narratives                                               | Sabra, S.; Mahmood Malik, K.; Alobaidi, M.                                                                  | 2018 | Comput Biol Med                                                                            | 10.1016/j.compbiomed.2017.12.026  | Non-cardiology focus       |
| August 2021 | Rapid identification of familial hypercholesterolemia from electronic health records: The SEARCH study                                          | Safarova, M. S.; Liu, H.; Kullo, I. J.                                                                      | 2016 | J Clin Lipidol                                                                             | 10.1016/j.jacl.2016.08.001        | Non-cardiology focus       |

|             |                                                                                                                                                                          |                                                                                                                                                                                                                       |      |                                                                                                    |                                                                                                       |                      |
|-------------|--------------------------------------------------------------------------------------------------------------------------------------------------------------------------|-----------------------------------------------------------------------------------------------------------------------------------------------------------------------------------------------------------------------|------|----------------------------------------------------------------------------------------------------|-------------------------------------------------------------------------------------------------------|----------------------|
| August 2021 | Sketch-based Registration of 3D Cine MRI to 4D flow MRI                                                                                                                  | Samin Sabokrohiyeh;<br>Kathleen Ang;<br>Mohammed Elbaz;<br>Faramarz Samavati                                                                                                                                          | 2019 | Proceedings of the 2019 11th International Conference on Bioinformatics and Biomedical Technology  | 10.1145/3340074.3340094                                                                               | Non-cardiology focus |
| August 2021 | UNRAVEL: big data analytics research data platform to improve care of patients with cardiomyopathies using routine electronic health records and standardised biobanking | Sammani, A.;<br>Linschoten, M.; de Jonge, N.; Kirkels, H.; van Laake, L. W.; te Riele, A. S. J. M.; Jansen, M.; van Tintel, J. P.; Dooijes, D.; Baas, A. F.; Bagheri, A.; Vink, A.; Harakalova, M.; Asselbergs, F. W. | 2019 | Netherlands Heart Journal                                                                          | <a href="http://dx.doi.org/10.1007/s12471-019-1288-4">http://dx.doi.org/10.1007/s12471-019-1288-4</a> | No NLP focus/details |
| August 2021 | Impedance Cardiography Used For Diagnosis of Disease                                                                                                                     | Samrudhi Patil; P. Choudhari                                                                                                                                                                                          | 2015 | Proceedings of the Third International Symposium on Women in Computing and Informatics             | 10.1145/2791405.2791477                                                                               | No NLP focus/details |
| August 2021 | A mobile app based smoking cessation assistance using automated detection of smoking activity                                                                            | Saurabh Singh Thakur;<br>Ram Babu Roy                                                                                                                                                                                 | 2018 | Proceedings of the ACM India Joint International Conference on Data Science and Management of Data | 10.1145/3152494.3167989                                                                               | Non-cardiology focus |
| August 2021 | Driver Emotion Recognition for Intelligent Vehicles: A Survey                                                                                                            | Sebastian Zepf; Javier Hernandez; Alexander Schmitt; Wolfgang Minker; Rosalind W. Picard                                                                                                                              | 2020 | ACM Comput. Surv.                                                                                  | 10.1145/3388790                                                                                       | Non-cardiology focus |

|             |                                                                                                                                               |                                                                                                                                                                                 |      |                                                                                                                                      |                                                                                                                 |                            |
|-------------|-----------------------------------------------------------------------------------------------------------------------------------------------|---------------------------------------------------------------------------------------------------------------------------------------------------------------------------------|------|--------------------------------------------------------------------------------------------------------------------------------------|-----------------------------------------------------------------------------------------------------------------|----------------------------|
| August 2021 | Natural language processing for disease phenotyping in UK primary care records for research: a pilot study in myocardial infarction and death | Shah, A. D.; Bailey, E.; Williams, T.; Denaxas, S.; Dobson, R.; Hemingway, H.                                                                                                   | 2019 | J Biomed Semantics                                                                                                                   | 10.1186/s13326-019-0214-4                                                                                       | Duplicate                  |
| August 2021 | Development of a Portable Tool to Identify Patients With Atrial Fibrillation Using Clinical Notes From the Electronic Medical Record          | Shah, R. U.; Mutharasan, R. K.; Ahmad, F. S.; Rosenblatt, A. G.; Gay, H. C.; Steinberg, B. A.; Yandell, M.; Tristani-Firouzi, M.; Klewer, J.; Mukherjee, R.; Lloyd-Jones, D. M. | 2020 | Circ Cardiovasc Qual Outcomes                                                                                                        | 10.1161/circoutcomes.120.006516                                                                                 | Included                   |
| August 2021 | Sex-based Differences in Reported Payments to Cardiologists by Drug and Device Manufacturers                                                  | Shapero, Kayle; Jelani, Qurat-Ul-Ain; Kahn, Peter                                                                                                                               | 2020 | Circulation                                                                                                                          | <a href="http://dx.doi.org/10.1161/circ.142.suppl_3.14058">http://dx.doi.org/10.1161/circ.142.suppl_3.14058</a> | No NLP focus/details       |
| August 2021 | Natural Language Processing of Clinical Notes on Chronic Diseases: Systematic Review                                                          | Sheikhalishahi, S.; Miotto, R.; Dudley, J. T.; Lavelli, A.; Rinaldi, F.; Osmani, V.                                                                                             | 2019 | JMIR Med Inform                                                                                                                      | 10.2196/12239                                                                                                   | Review/perspective article |
| August 2021 | CardioLearn: A Cloud Deep Learning Service for Cardiac Disease Detection from Electrocardiogram                                               | Shenda Hong; Zhaoji Fu; Rongbo Zhou; Jie Yu; Yongkui Li; Kai Wang; Guanlin Cheng                                                                                                | 2020 | Companion Proceedings of the Web Conference 2020                                                                                     | 10.1145/3366424.3383529                                                                                         | No NLP focus/details       |
| August 2021 | DocKG: A knowledge graph framework for health with doctor-in-the-loop                                                                         | Sheng, M.; Wang, J.; Zhang, Y.; Li, X.; Li, C.; Xing, C.; Li, Q.; Shao, Y.; Zhang, H.                                                                                           | 2019 | Lecture Notes in Computer Science (including subseries Lecture Notes in Artificial Intelligence and Lecture Notes in Bioinformatics) | 10.1007/978-3-030-32962-4_1                                                                                     | Non-cardiology focus       |

|             |                                                                                                                                                                             |                                                                                                                                                                                                                                                                                                                                                                                        |      |                                                                                   |                                                                                                                 |                      |
|-------------|-----------------------------------------------------------------------------------------------------------------------------------------------------------------------------|----------------------------------------------------------------------------------------------------------------------------------------------------------------------------------------------------------------------------------------------------------------------------------------------------------------------------------------------------------------------------------------|------|-----------------------------------------------------------------------------------|-----------------------------------------------------------------------------------------------------------------|----------------------|
| August 2021 | Identification and evaluation of patients with LDL-C >= 190 mg/dl at a tertiary academic center                                                                             | Sheth, Samip; Rader, Daniel; Jacoby, Douglas                                                                                                                                                                                                                                                                                                                                           | 2019 | Clinical Cardiology                                                               | <a href="http://dx.doi.org/10.1002/clc.23281">http://dx.doi.org/10.1002/clc.23281</a>                           | No NLP focus/details |
| August 2021 | Identifying a set of potential patients for familial hypercholesterolemia evaluation through a simple query and text-mining function                                        | Sheth, Samip; Rader, Daniel; Jacoby, Douglas                                                                                                                                                                                                                                                                                                                                           | 2019 | Clinical Cardiology                                                               | <a href="http://dx.doi.org/10.1002/clc.23281">http://dx.doi.org/10.1002/clc.23281</a>                           | Non-cardiology focus |
| August 2021 | Implementation of flag, identify, network, deliver: Find fh using the electronic medical record to identify familial hypercholesterolemia within a single healthcare system | Sheth, Samip; Williamson, Latoya; Chen, Jinbo; Staszak, David; Webb, Gayley; Risman, Marjorie; Borovskiy, Yuliya; Hossain, Erik; Hajj, Jihane; Diu, Kady; Larsen, Julia A.; Boring, Jennifer; Mays, Cynthia; Howard, William; Zuzick, Dave; Bajaj, Archana; Soffer, Daniel E.; Cuchel, Marina; Gidding, Samuel; Wilemon, Katherine A.; Rader, Daniel J.; Myers, Kelly; Jacoby, Douglas | 2019 | Circulation                                                                       | <a href="http://dx.doi.org/10.1161/circ.140.suppl_1.16536">http://dx.doi.org/10.1161/circ.140.suppl_1.16536</a> | Non-cardiology focus |
| August 2021 | Coronary Artery Disease Classification from Photoplethysmographic Signals                                                                                                   | Shibabroto Banerjee; Pourush Sood; Sujoy Ghose; Partha Pratim Das                                                                                                                                                                                                                                                                                                                      | 2020 | Proceedings of the 4th International Conference on Medical and Health Informatics | 10.1145/3418094.3418116                                                                                         | No NLP focus/details |
| August 2021 | Automatic data source identification for clinical trial eligibility criteria resolution                                                                                     | Shivade, C.; Hebert, C.; Regan, K.; Fosler-Lussier, E.; Lai, A. M.                                                                                                                                                                                                                                                                                                                     | 2016 | AMIA Annu Symp Proc                                                               |                                                                                                                 | Non-cardiology focus |
| August 2021 | Comparison of UMLS terminologies to identify risk of heart disease using clinical notes                                                                                     | Shivade, C.; Malewadkar, P.; Fosler-Lussier, E.; Lai, A. M.                                                                                                                                                                                                                                                                                                                            | 2015 | J Biomed Inform                                                                   | 10.1016/j.jbi.2015.08.025                                                                                       | Non-cardiology focus |

|             |                                                                                                                                                    |                                                                                                             |      |                                                                                                                                                                                        |                                                                                                               |                            |
|-------------|----------------------------------------------------------------------------------------------------------------------------------------------------|-------------------------------------------------------------------------------------------------------------|------|----------------------------------------------------------------------------------------------------------------------------------------------------------------------------------------|---------------------------------------------------------------------------------------------------------------|----------------------------|
| August 2021 | A first step towards on-device monitoring of body sounds in the wild                                                                               | Shyam A. Tailor;<br>Jagmohan Chauhan;<br>Cecilia Mascolo                                                    | 2020 | Adjunct Proceedings of the 2020 ACM International Joint Conference on Pervasive and Ubiquitous Computing and Proceedings of the 2020 ACM International Symposium on Wearable Computers | 10.1145/3410530.3414440                                                                                       | No NLP focus/details       |
| August 2021 | A Baseline Patient Model to Support Testing of Medical Cyber-Physical Systems                                                                      | Silva, L. C.; Perkusich, M.; Almeida, H. O.; Perkusich, A.; Lima, M. A.; Gorgvñnio, K. C.                   | 2015 | Stud Health Technol Inform                                                                                                                                                             |                                                                                                               | Non-cardiology focus       |
| August 2021 | VitaMon: measuring heart rate variability using smartphone front camera                                                                            | Sinh Huynh; Rajesh Krishna Balan; JeongGil Ko; Youngki Lee                                                  | 2019 | Proceedings of the 17th Conference on Embedded Networked Sensor Systems                                                                                                                | 10.1145/3356250.3360036                                                                                       | No NLP focus/details       |
| August 2021 | How Will Machine Learning Inform the Clinical Care of Atrial Fibrillation?                                                                         | Siontis, Konstantinos C.; Noseworthy, Peter A.; Yao, Xiaoxi; Philippakis, Anthony A.; Pirruccello, James P. | 2020 | Circulation Research                                                                                                                                                                   | <a href="http://dx.doi.org/10.1161/CIRCRESAHA.120.316401">http://dx.doi.org/10.1161/CIRCRESAHA.120.316401</a> | Review/perspective article |
| August 2021 | Improving guideline-directed medical therapy utilization for heart failure with reduced ejection fraction within a veteran's affairs health system | Slade, Justin J.; Lee, Michelle; Park, Jun; Liu, Alexander; Heidenreich, Paul A.; Allaudeen, Nazima         | 2020 | Circulation: Cardiovascular Quality and Outcomes                                                                                                                                       |                                                                                                               | Abstract only              |

|             |                                                                                                                                                                             |                                                                                                                                                                                                                                                                                                              |      |                                                                             |                                                                                                       |                      |
|-------------|-----------------------------------------------------------------------------------------------------------------------------------------------------------------------------|--------------------------------------------------------------------------------------------------------------------------------------------------------------------------------------------------------------------------------------------------------------------------------------------------------------|------|-----------------------------------------------------------------------------|-------------------------------------------------------------------------------------------------------|----------------------|
| August 2021 | Text mining applied to electronic cardiovascular procedure reports to identify patients with trileaflet aortic stenosis and coronary artery disease                         | Small, Aeron M.; Kiss, Daniel H.; Guerraty, Marie A.; Han, Yuchi; Anwaruddin, Saif; Chirinos, Julio A.; Wilensky, Robert L.; Giri, Jay; Zlatsin, Yevgeny; Holmes, John H.; Birtwell, David L.; Williams, Heather; Rader, Daniel J.                                                                           | 2017 | Journal of Biomedical Informatics                                           | <a href="http://dx.doi.org/10.1016/j.jbi.2017.06.016">http://dx.doi.org/10.1016/j.jbi.2017.06.016</a> | No NLP focus/details |
| August 2021 | FIB-4 stage of liver fibrosis is associated with incident heart failure with preserved, but not reduced, ejection fraction among people with and without HIV or hepatitis C | So-Armah, K. A.; Lim, J. K.; Lo Re, V.; Tate, J. P.; Chang, C. C. H.; Butt, A. A.; Gibert, C. L.; Rimland, D.; Marconi, V. C.; Goetz, M. B.; Ramachandran, V.; Brittain, E.; Long, M.; Nguyen, K. L.; Rodriguez-Barradas, M. C.; Budoff, M. J.; Tindle, H. A.; Samet, J. H.; Justice, A. C.; Freiberg, M. S. | 2020 | Progress in Cardiovascular Diseases                                         | <a href="https://doi.org/10.1016/j.pcad.2020.02.010">10.1016/j.pcad.2020.02.010</a>                   | Non-cardiology focus |
| August 2021 | Using Social Media to Predict Air Pollution during California Wildfires                                                                                                     | Sonya Sachdeva; Sarah McCaffrey                                                                                                                                                                                                                                                                              | 2018 | Proceedings of the 9th International Conference on Social Media and Society | <a href="https://doi.org/10.1145/3217804.3217946">10.1145/3217804.3217946</a>                         | Non-cardiology focus |
| August 2021 | Identifying Patient Phenotype Cohorts Using Prehospital Electronic Health Record Data                                                                                       | Sterman, R.; Bunning, T.; Grover, J.; Kitzmiller, R.; Patel, M. D.                                                                                                                                                                                                                                           | 2020 | Prehospital Emergency Care                                                  | <a href="https://doi.org/10.1080/10903127.2020.1859658">10.1080/10903127.2020.1859658</a>             | Non-cardiology focus |

|             |                                                                                                                                                                              |                                                                                                                     |      |                                                                                                  |                                                                                                                           |                      |
|-------------|------------------------------------------------------------------------------------------------------------------------------------------------------------------------------|---------------------------------------------------------------------------------------------------------------------|------|--------------------------------------------------------------------------------------------------|---------------------------------------------------------------------------------------------------------------------------|----------------------|
| August 2021 | Creating Fair Models of Atherosclerotic Cardiovascular Disease Risk                                                                                                          | Stephen Pfohl; Ben Marafino; Adrien Coulet; Fatima Rodriguez; Latha Palaniappan; Nigam H. Shah                      | 2019 | Proceedings of the 2019 AAAI/ACM Conference on AI, Ethics, and Society                           | 10.1145/3306618.3314278                                                                                                   | Non-cardiology focus |
| August 2021 | Novel Method to Flag Cardiac Implantable Device Infections by Integrating Text Mining with Structured Data in the Veterans Health Administration's Electronic Medical Record | Stolzmann, Kelly L.; Shin, Marlina H.; Kalver, Emily; Mull, Hillary J.; Schweizer, Marin L.; Branch-Elliman, Westyn | 2020 | JAMA Network Open                                                                                | <a href="http://dx.doi.org/10.1001/jama.networkopen.2020.12264">http://dx.doi.org/10.1001/jama.networkopen.2020.12264</a> | No NLP focus/details |
| August 2021 | Identifying risk factors for heart disease over time: Overview of 2014 i2b2/UTHealth shared task Track 2                                                                     | Stubbs, A.; Kotfila, C.; Xu, H.; Uzuner, vñ                                                                         | 2015 | J Biomed Inform                                                                                  | 10.1016/j.jbi.2015.07.001                                                                                                 | Non-cardiology focus |
| August 2021 | Annotating risk factors for heart disease in clinical narratives for diabetic patients                                                                                       | Stubbs, A.; Uzuner, vñ                                                                                              | 2015 | J Biomed Inform                                                                                  | 10.1016/j.jbi.2015.05.009                                                                                                 | Non-cardiology focus |
| August 2021 | Developing a cardiovascular disease risk factor annotated corpus of Chinese electronic medical records                                                                       | Su, J.; He, B.; Guan, Y.; Jiang, J.; Yang, J.                                                                       | 2017 | BMC Med Inform Decis Mak                                                                         | 10.1186/s12911-017-0512-7                                                                                                 | Non-cardiology focus |
| August 2021 | Extraction of risk factors for cardiovascular diseases from Chinese electronic medical records                                                                               | Su, Jia; Hu, Jinpeng; Jiang, Jingchi; Xie, Jing; Yang, Yang; He, Bin; Guan, Yi; Yang, Jinfeng                       | 2019 | Computer Methods and Programs in Biomedicine                                                     | <a href="http://dx.doi.org/10.1016/j.cmpb.2019.01.007">http://dx.doi.org/10.1016/j.cmpb.2019.01.007</a>                   | Non-cardiology focus |
| August 2021 | Detection of Paroxysmal Atrial Fibrillation using Attention-based Bidirectional Recurrent Neural Networks                                                                    | Supreeth P. Shashikumar; Amit J. Shah; Gari D. Clifford; Shamim Nemati                                              | 2018 | Proceedings of the 24th ACM SIGKDD International Conference on Knowledge Discovery & Data Mining | 10.1145/3219819.3219912                                                                                                   | No NLP focus/details |

|             |                                                                                               |                                                                                                                     |      |                                                                                                                              |                                                                                                   |                            |
|-------------|-----------------------------------------------------------------------------------------------|---------------------------------------------------------------------------------------------------------------------|------|------------------------------------------------------------------------------------------------------------------------------|---------------------------------------------------------------------------------------------------|----------------------------|
| August 2021 | Issues of Development of Smart Transport Assessment Indicators                                | Svetlana Gutman; Polina Vorontsova                                                                                  | 2020 | Proceedings of the International Scientific Conference - Digital Transformation on Manufacturing, Infrastructure and Service | 10.1145/3446434.3446438                                                                           | No NLP focus/details       |
| August 2021 | Identification of Sudden Cardiac Arrest (SCA) using Modified Wavelet Transform                | Syed Hassaan Ahmed; Nauman Razzaq; Tahir Zaidi                                                                      | 2017 | Proceedings of the 2nd International Conference on Biomedical Signal and Image Processing                                    | 10.1145/3133793.3133799                                                                           | No NLP focus/details       |
| August 2021 | S1 and S2 Heart Sound Recognition Using Deep Neural Networks                                  | T. E. Chen; S. I. Yang; L. T. Ho; K. H. Tsai; Y. H. Chen; Y. F. Chang; Y. H. Lai; S. S. Wang; Y. Tsao; C. C. Wu     | 2017 | IEEE Transactions on Biomedical Engineering                                                                                  | 10.1109/TBME.2016.2559800                                                                         | No NLP focus/details       |
| August 2021 | Numerical Data Extraction from ECG Paper Recording Using Image Processing Technique           | T. Tabassum; M. Ahmad                                                                                               | 2020 | 2020 11th International Conference on Electrical and Computer Engineering (ICECE)                                            | 10.1109/ICECE51571.2020.9393068                                                                   | No NLP focus/details       |
| August 2021 | The state of radiology AI: Considerations for purchase decisions and current market offerings | Tadavarthi, Yasasvi; Vey, Brianna; Krupinski, Elizabeth; Prater, Adam; Gichoya, Judy; Safdar, Nabile; Trivedi, Hari | 2020 | Radiology: Artificial Intelligence                                                                                           | <a href="http://dx.doi.org/10.1148/ryai.2020200004">http://dx.doi.org/10.1148/ryai.2020200004</a> | Review/perspective article |



|             |                                                                                                                                                |                                                                                                                                                   |      |                                                                          |                                     |                      |
|-------------|------------------------------------------------------------------------------------------------------------------------------------------------|---------------------------------------------------------------------------------------------------------------------------------------------------|------|--------------------------------------------------------------------------|-------------------------------------|----------------------|
| August 2021 | Prediction of heart disease using name entity recognition based on back propagation and whale optimization algorithms                          | Thambusamy, V.;<br>Umasankar, L.                                                                                                                  | 2019 | International Journal of Innovative Technology and Exploring Engineering | 10.35940/ijitee.J1081.08810S19      | Non-cardiology focus |
| August 2021 | Trends in Left Ventricular Ejection Fraction for Patients With a New Diagnosis of Heart Failure                                                | Tisdale, R. L.; Haddad, F.;<br>Kohsaka, S.;<br>Heidenreich, P. A.                                                                                 | 2020 | Circ Heart Fail                                                          | 10.1161/circheartfailure.119.006743 | No NLP focus/details |
| August 2021 | Natural Language Processing for Mimicking Clinical Trial Recruitment in Critical Care: A Semi-Automated Simulation Based on the LeoPARDS Trial | Tissot, H. C.; Shah, A. D.;<br>Brealey, D.; Harris, S.;<br>Agbakoba, R.; Folarin, A.;<br>Romao, L.; Roguski, L.;<br>Dobson, R.; Asselbergs, F. W. | 2020 | IEEE J Biomed Health Inform                                              | 10.1109/jbhi.2020.2977925           | Non-cardiology focus |
| August 2021 |                                                                                                                                                | 2016<br>Tomas, C.C.                                                                                                                               | 200  |                                                                          |                                     |                      |
| August 2021 | Proceedings of the 3rd IPLEiria's International Health Congress : Leiria, Portugal. 6-7 May 2017                                               | Tomas, C.C.                                                                                                                                       | 2016 | BMC Health Serv Res                                                      | 10.1186/s12913-016-1423-5           | Abstract only        |
| August 2021 | Mining Clinicians' Electronic Documentation to Identify Heart Failure Patients with Ineffective Self-Management: A Pilot Text-Mining Study     | Topaz, M.;<br>Radhakrishnan, K.; Lei, V.;<br>Zhou, L.                                                                                             | 2016 | Stud Health Technol Inform                                               |                                     | Duplicate            |
| August 2021 | Risk factor detection for heart disease by applying text analytics in electronic medical records                                               | Torii, M.; Fan, J. W.;<br>Yang, W. L.; Lee, T.;<br>Wiley, M. T.; Zisook, D. S.;<br>Huang, Y.                                                      | 2015 | J Biomed Inform                                                          | 10.1016/j.jbi.2015.08.011           | Non-cardiology focus |
| August 2021 | Deep Natural Language Processing Identifies Variation in Care Preference Documentation                                                         | Udelsman, B. V.;<br>Moseley, E. T.; Sudore, R. L.;<br>Keating, N. L.;<br>Lindvall, C.                                                             | 2020 | J Pain Symptom Manage                                                    | 10.1016/j.jpainsymman.2019.12.374   | Non-cardiology focus |

|             |                                                                                                                                   |                                                        |      |                                                                                            |                            |                            |
|-------------|-----------------------------------------------------------------------------------------------------------------------------------|--------------------------------------------------------|------|--------------------------------------------------------------------------------------------|----------------------------|----------------------------|
| August 2021 | Contactless seismocardiography via deep learning radars                                                                           | Unsoo Ha; Salah Assana; Fadel Adib                     | 2020 | Proceedings of the 26th Annual International Conference on Mobile Computing and Networking | 10.1145/3372224.3419982    | No NLP focus/details       |
| August 2021 | Mining heart disease risk factors in clinical text with named entity recognition and distributional semantic models               | Urbain, J.                                             | 2015 | J Biomed Inform                                                                            | 10.1016/j.jbi.2015.08.009  | Non-cardiology focus       |
| August 2021 | Heart Rhythm Abnormality Detection from PCG Signal                                                                                | V. Garg; A. Mathur; N. Mangla; A. S. Rawat             | 2019 | 2019 Twelfth International Conference on Contemporary Computing (IC3)                      | 10.1109/IC3.2019.8844950   | No NLP focus/details       |
| August 2021 | Botswana's Lab-In-A-Briefcase: A Position Paper                                                                                   | V. Lakshmi Narasimhan                                  | 2019 | Proceedings of the Australasian Computer Science Week Multiconference                      | 10.1145/3290688.3290716    | Review/perspective article |
| August 2021 | Continuous Health Interface Event Retrieval                                                                                       | Vaibhav Pandey; Nitish Nag; Ramesh Jain                | 2020 | Proceedings of the 2020 International Conference on Multimedia Retrieval                   | 10.1145/3372278.3390705    | Non-cardiology focus       |
| August 2021 | Comparing Artificial Intelligence Approaches to Retrieve Clinical Reports Documenting Implantable Devices Posing MRI Safety Risks | Valtchinov, V. I.; Lacson, R.; Wang, A.; Khorasani, R. | 2020 | Journal of the American College of Radiology                                               | 10.1016/j.jacr.2019.07.018 | Non-cardiology focus       |

|             |                                                                                                                                                          |                                                                                                                                                                                                                                                                                                                                                                                                                                                                                                                                                                                                                                                                                                                                                                                             |      |                          |                                                                                                         |                      |
|-------------|----------------------------------------------------------------------------------------------------------------------------------------------------------|---------------------------------------------------------------------------------------------------------------------------------------------------------------------------------------------------------------------------------------------------------------------------------------------------------------------------------------------------------------------------------------------------------------------------------------------------------------------------------------------------------------------------------------------------------------------------------------------------------------------------------------------------------------------------------------------------------------------------------------------------------------------------------------------|------|--------------------------|---------------------------------------------------------------------------------------------------------|----------------------|
| August 2021 | Genetic Predisposition to Coronary Artery Disease in Type 2 Diabetes Mellitus                                                                            | Ladenvall, C.; Voight, B. F.; Strawbridge, R. J.; Fernandez-Tajes, J.; Rayner, N. W.; Robertson, N. R.; Mahajan, A.; Vlachopoulou, E.; Goel, A.; Kleber, M. E.; Nelson, C. P.; Kwee, L. C.; Esko, T.; Mihailov, E.; MVŠgi, R.; Milani, L.; Fischer, K.; Kanoni, S.; Kumar, J.; Song, C.; Hartiala, J. A.; Pedersen, N. L.; Perola, M.; Gieger, C.; Peters, A.; Qu, L.; Willems, S. M.; Doney, A. S. F.; Morris, A. D.; Zheng, Y.; Sesti, G.; Hu, F. B.; Qi, L.; Laakso, M.; Thorsteinsdottir, U.; Grallert, H.; van Duijn, C.; Reilly, M. P.; Ingelsson, E.; Deloukas, P.; Kathiresan, S.; Metspalu, A.; Shah, S. H.; Sinisalo, J.; Salomaa, V.; Hamsten, A.; Samani, N. J.; MVŠrz, W.; Hazen, S. L.; Watkins, H.; Saleheen, D.; Morris, A. P.; Colhoun, H. M.; Groop, L.; McCarthy, M. I.; | 2020 | Circ Genom<br>Precis Med | 10.1161/circgen.119.002769                                                                              | Non-cardiology focus |
| August 2021 | PCV66 GUIDELINE-DIRECTED MEDICAL THERAPY AMONG HEART FAILURE PATIENTS FACILITATED BY NATURAL LANGUAGE PROCESSING OF AMBULATORY ELECTRONIC HEALTH RECORDS | Vasey, J.; Martinez, E.; Nguyen, N.; Oguntuga, A.; Sudaria, T.; Farah, J.; Wilk, A.; Sadiq, G.; Kallenbach, L.                                                                                                                                                                                                                                                                                                                                                                                                                                                                                                                                                                                                                                                                              | 2020 | Value in Health          | <a href="http://dx.doi.org/10.1016/j.jval.2020.04.169">http://dx.doi.org/10.1016/j.jval.2020.04.169</a> | Abstract only        |

|             |                                                                                                                                                                            |                                                                                                                                                                                                                                                                            |      |                            |                                      |                      |
|-------------|----------------------------------------------------------------------------------------------------------------------------------------------------------------------------|----------------------------------------------------------------------------------------------------------------------------------------------------------------------------------------------------------------------------------------------------------------------------|------|----------------------------|--------------------------------------|----------------------|
| August 2021 | Supervised methods to extract clinical events from cardiology reports in Italian                                                                                           | Viani, N.; Miller, T. A.; Napolitano, C.; Priori, S. G.; Savova, G. K.; Bellazzi, R.; Sacchi, L.                                                                                                                                                                           | 2019 | J Biomed Inform            | 10.1016/j.jbi.2019.103219            | Included             |
| August 2021 | Development and Validation of a Natural Language Processing Tool to Generate the CONSORT Reporting Checklist for Randomized Clinical Trials                                | Wang, F.; Schilsky, R. L.; Page, D.; Califf, R. M.; Cheung, K.; Wang, X.; Pang, H.                                                                                                                                                                                         | 2020 | JAMA Netw Open             | 10.1001/jamanetworkopen.2020.14661   | Non-cardiology focus |
| August 2021 | NLP based congestive heart failure case finding: A prospective analysis on statewide electronic medical records                                                            | Wang, Y.; Luo, J.; Hao, S.; Xu, H.; Shin, A. Y.; Jin, B.; Liu, R.; Deng, X.; Wang, L.; Zheng, L.; Zhao, Y.; Zhu, C.; Hu, Z.; Fu, C.; Hao, Y.; Zhao, Y.; Jiang, Y.; Dai, D.; Culver, D. S.; Alfreds, S. T.; Todd, R.; Stearns, F.; Sylvester, K. G.; Widen, E.; Ling, X. B. | 2015 | Int J Med Inform           | 10.1016/j.ijmedinf.2015.06.007       | Duplicate            |
| August 2021 | Drugs for preventing postoperative nausea and vomiting in adults after general anaesthesia: a network meta-analysis                                                        | Weibel, S.; Rvöcker, G.; Eberhart, L. H.; Pace, N. L.; Hartl, H. M.; Jordan, O. L.; Mayer, D.; Riemer, M.; Schaefer, M. S.; Raj, D.; Backhaus, I.; Helf, A.; Schlesinger, T.; Kienbaum, P.; Kranke, P.                                                                     | 2020 | Cochrane Database Syst Rev | 10.1002/14651858.CD012859.pub2       | Non-cardiology focus |
| August 2021 | Towards automated generation of curated datasets in radiology: Application of natural language processing to unstructured reports exemplified on CT for pulmonary embolism | Weikert, T.; Nestic, I.; Cyriac, J.; Bremerich, J.; Sauter, A. W.; Sommer, G.; Stieltjes, B.                                                                                                                                                                               | 2020 | Eur J Radiol               | 10.1016/j.ejrad.2020.108862          | Non-cardiology focus |
| August 2021 | Use of Natural Language Processing to Improve Identification of Patients With Peripheral Artery Disease                                                                    | Weissler, E. H.; Zhang, J.; Lippmann, S.; Rusincovitch, S.; Henao, R.; Jones, W. S.                                                                                                                                                                                        | 2020 | Circ Cardiovasc Interv     | 10.1161/circinterventions.120.009447 | Non-cardiology focus |
| August 2021 | Adapting and evaluating a deep learning language model for clinical why-question answering                                                                                 | Wen, A.; Elwazir, M. Y.; Moon, S.; Fan, J.                                                                                                                                                                                                                                 | 2020 | JAMIA Open                 | 10.1093/jamiaopen/ooz072             | Non-cardiology focus |

|             |                                                                                                                                                           |                                                                                                                                                                                                      |      |                                                                          |                                                                                                         |                      |
|-------------|-----------------------------------------------------------------------------------------------------------------------------------------------------------|------------------------------------------------------------------------------------------------------------------------------------------------------------------------------------------------------|------|--------------------------------------------------------------------------|---------------------------------------------------------------------------------------------------------|----------------------|
| August 2021 | Multivariate Sequential Analytics for Treatment Trajectory Forecasting                                                                                    | William Hsu; Jim Warren; Patricia Riddle                                                                                                                                                             | 2019 | Proceedings of the Australasian Computer Science Week Multiconference    | 10.1145/3290688.3290724                                                                                 | Non-cardiology focus |
| August 2021 | An attention-based multi-task model for named entity recognition and intent analysis of Chinese online medical questions                                  | Wu, C.; Luo, G.; Guo, C.; Ren, Y.; Zheng, A.; Yang, C.                                                                                                                                               | 2020 | J Biomed Inform                                                          | 10.1016/j.jbi.2020.103511                                                                               | Non-cardiology focus |
| August 2021 | SemEHR: A general-purpose semantic search system to surface semantic data from clinical notes for tailored care, trial recruitment, and clinical research | Wu, H.; Toti, G.; Morley, K. I.; Ibrahim, Z. M.; Folarin, A.; Jackson, R.; Kartoglu, I.; Agrawal, A.; Stringer, C.; Gale, D.; Gorrell, G.; Roberts, A.; Broadbent, M.; Stewart, R.; Dobson, R. J. B. | 2018 | J Am Med Inform Assoc                                                    | 10.1093/jamia/ocx160                                                                                    | Non-cardiology focus |
| August 2021 | Identification of patients with carotid stenosis using natural language processing                                                                        | Wu, Xiao; Zhao, Yuzhe; Radev, Dragomir; Malhotra, Ajay                                                                                                                                               | 2020 | European Radiology                                                       | <a href="http://dx.doi.org/10.1007/s00330-020-06721-z">http://dx.doi.org/10.1007/s00330-020-06721-z</a> | Non-cardiology focus |
| August 2021 | Designing an openEHR-Based Pipeline for Extracting and Standardizing Unstructured Clinical Data Using Natural Language Processing                         | Wulff, A.; Mast, M.; Hassler, M.; Montag, S.; Marschollek, M.; Jack, T.                                                                                                                              | 2020 | Methods Inf Med                                                          | 10.1055/s-0040-1716403                                                                                  | Non-cardiology focus |
| August 2021 | A Delay-Based Neuromorphic Processor for Arrhythmias Detection                                                                                            | X. Liang; H. Fan; J. Mercer; H. Heidari                                                                                                                                                              | 2020 | 2020 IEEE International Symposium on Circuits and Systems (ISCAS)        | 10.1109/ISCAS45731.2020.9181032                                                                         | No NLP focus/details |
| August 2021 | A Neural-Network Model for Deriving Analogous Three-vector ECGs of S-ICD from Standard Nine-lead ECGs                                                     | Xiaobiao Fan; Yuxiang Bu; Dakun Lai                                                                                                                                                                  | 2020 | 2020 2nd International Conference on Image Processing and Machine Vision | 10.1145/3421558.3421576                                                                                 | No NLP focus/details |

|             |                                                                                                       |                                                                                                                                                     |      |                                                                                                                                     |                                |                      |
|-------------|-------------------------------------------------------------------------------------------------------|-----------------------------------------------------------------------------------------------------------------------------------------------------|------|-------------------------------------------------------------------------------------------------------------------------------------|--------------------------------|----------------------|
| August 2021 | Non-contact home health monitoring based on low-cost high-performance accelerometers                  | Xiaoce Feng; Yong Xu; Ming Dong; Philip Levy                                                                                                        | 2017 | Proceedings of the Second IEEE/ACM International Conference on Connected Health: Applications, Systems and Engineering Technologies | 10.1109/chase.2017.119         | Non-cardiology focus |
| August 2021 | Learning an expandable EMR-based medical knowledge network to enhance clinical diagnosis              | Xie, J.; Jiang, J.; Wang, Y.; Guan, Y.; Guo, X.                                                                                                     | 2020 | Artificial Intelligence in Medicine                                                                                                 | 10.1016/j.artmed.2020.101927   | Non-cardiology focus |
| August 2021 | Enhancing ICD-Code-Based Case Definition for Heart Failure Using Electronic Medical Record Data       | Xu, Y.; Lee, S.; Martin, E.; D'Souza A, G.; Doktorchik, C. T. A.; Jiang, J.; Lee, S.; Eastwood, C. A.; Fine, N.; Hemmelgarn, B.; Todd, K.; Quan, H. | 2020 | J Card Fail                                                                                                                         | 10.1016/j.cardfail.2020.04.003 | No NLP focus/details |
| August 2021 | Novel blood pressure estimation method using single photoplethysmography feature                      | Y. Chen; S. Cheng; T. Wang; T. Ma                                                                                                                   | 2017 | 2017 39th Annual International Conference of the IEEE Engineering in Medicine and Biology Society (EMBC)                            | 10.1109/EMBC.2017.8037172      | No NLP focus/details |
| August 2021 | Preprocessing Method for Performance Enhancement in CNN-Based STEMI Detection From 12-Lead ECG        | Y. Park; I. D. Yun; S. H. Kang                                                                                                                      | 2019 | IEEE Access                                                                                                                         | 10.1109/ACCESS.2019.2930770    | No NLP focus/details |
| August 2021 | The Neural Network of One-Dimensional Convolution-An Example of the Diagnosis of Diabetic Retinopathy | Y. Sun                                                                                                                                              | 2019 | IEEE Access                                                                                                                         | 10.1109/ACCESS.2019.2916922    | Non-cardiology focus |

|             |                                                                                                                                   |                                                                                                         |      |                                                                                                             |                                |                      |
|-------------|-----------------------------------------------------------------------------------------------------------------------------------|---------------------------------------------------------------------------------------------------------|------|-------------------------------------------------------------------------------------------------------------|--------------------------------|----------------------|
| August 2021 | Early detection of heart failure with varying prediction windows by structured and unstructured data in electronic health records | Y. Wang; K. Ng; R. J. Byrd; J. Hu; S. Ebadollahi; Z. Daar; C. deFilippi; S. R. Steinhubl; W. F. Stewart | 2015 | 2015 37th Annual International Conference of the IEEE Engineering in Medicine and Biology Society (EMBC)    | 10.1109/EMBC.2015.7318907      | Non-cardiology focus |
| August 2021 | A hybrid model for automatic identification of risk factors for heart disease                                                     | Yang, H.; Garibaldi, J. M.                                                                              | 2015 | J Biomed Inform                                                                                             | 10.1016/j.jbi.2015.09.006      | Non-cardiology focus |
| August 2021 | Prediction of Double-High Biochemical Indicators Based on LightGBM and XGBoost                                                    | Yingying Song; Xueli Jiao; Yuheng Qiao; Xinrui Liu; Yiding Qiang; Zhiyong Liu; Lin Zhang                | 2019 | Proceedings of the 2019 International Conference on Artificial Intelligence and Computer Science            | 10.1145/3349341.3349400        | No NLP focus/details |
| August 2021 | Muscle Artifacts Cancellation Framework for ECG Signals Combining Convolution Auto-encoder and Average Beat Subtraction           | Yongfeng Huang; Zijian Ding; Guijin Wang; Jianpin Lin; Ping Zhang                                       | 2019 | Proceedings of the 2019 4th International Conference on Biomedical Signal and Image Processing (ICBIP 2019) | 10.1145/3354031.3354041        | No NLP focus/details |
| August 2021 | Tentative diagnosis prediction via deep understanding of patient narratives                                                       | Yu, Y.; Li, M.; Liu, L.; Wu, F. X.; Wang, J.                                                            | 2019 | Proceedings - 2019 IEEE International Conference on Bioinformatics and Biomedicine, BIBM 2019               | 10.1109/BIBM47256.2019.8983129 | Non-cardiology focus |

|             |                                                                                                                              |                                                                                                                              |      |                                                                                                                                                        |                            |                      |
|-------------|------------------------------------------------------------------------------------------------------------------------------|------------------------------------------------------------------------------------------------------------------------------|------|--------------------------------------------------------------------------------------------------------------------------------------------------------|----------------------------|----------------------|
| August 2021 | Muscleblazer: a wearable laser tag module powered by PGM-induced force-feedback                                              | Yusuke Kishishita;<br>Antonio Vega Ramirez;<br>Swagata Das; Chetan Thakur; Yohei Yanase; Yuichi Kurita                       | 2018 | Proceedings of the First Superhuman Sports Design Challenge: First International Symposium on Amplifying Capabilities and Competing in Mixed Realities | 10.1145/3210299.3210302    | No NLP focus/details |
| August 2021 | A Regularized Deep Learning Approach for Clinical Risk Prediction of Acute Coronary Syndrome Using Electronic Health Records | Z. Huang; W. Dong; H. Duan; J. Liu                                                                                           | 2018 | IEEE Transactions on Biomedical Engineering                                                                                                            | 10.1109/TBME.2017.2731158  | Non-cardiology focus |
| August 2021 | Automated brain extraction and associated 3D inspection layers for the Rhesus macaque MRI datasets                           | Zeqing Fu; Yiyi Deng; Xin Jia; Bin Gao; Xiaoming Zhu; Yanlin Luo                                                             | 2016 | Proceedings of the 15th ACM SIGGRAPH Conference on Virtual-Reality Continuum and Its Applications in Industry - Volume 1                               | 10.1145/3013971.3013984    | No NLP focus/details |
| August 2021 | A study of EMR-based medical knowledge network and its applications                                                          | Zhao, C.; Jiang, J.; Xu, Z.; Guan, Y.                                                                                        | 2017 | Computer Methods and Programs in Biomedicine                                                                                                           | 10.1016/j.cmpb.2017.02.016 | Non-cardiology focus |
| August 2021 | Automated abstraction of myocardial perfusion imaging reports using natural language processing                              | Zheng, C.; Sun, B. C.; Wu, Y. L.; Ferencik, M.; Lee, M. S.; Redberg, R. F.; Kawatkar, A. A.; Musigdilok, V. V.; Sharp, A. L. | 2020 | J Nucl Cardiol                                                                                                                                         | 10.1007/s12350-020-02401-z | Non-cardiology focus |



|             |                                                                                                                                                                                                                                 |                                                                                                                                                                                                                                                                                            |      |                                                                           |                         |                      |
|-------------|---------------------------------------------------------------------------------------------------------------------------------------------------------------------------------------------------------------------------------|--------------------------------------------------------------------------------------------------------------------------------------------------------------------------------------------------------------------------------------------------------------------------------------------|------|---------------------------------------------------------------------------|-------------------------|----------------------|
| August 2021 | Automated identification and extraction of exercise treadmill test results                                                                                                                                                      | Zheng, C.; Sun, B. C.; Wu, Y. L.; Lee, M. S.; Shen, E.; Redberg, R. F.; Ferencik, M.; Natsui, S.; Kawatkar, A. A.; Musigdilok, V. V.; Sharp, A. L.                                                                                                                                         | 2020 | Journal of the American Heart Association                                 | 10.1161/JAHA.119.014940 | Duplicate            |
| August 2021 | Web-based Real-Time Case Finding for the Population Health Management of Patients With Diabetes Mellitus: A Prospective Validation of the Natural Language Processing-Based Algorithm With Statewide Electronic Medical Records | Zheng, L.; Wang, Y.; Hao, S.; Shin, A. Y.; Jin, B.; Ngo, A. D.; Jackson-Browne, M. S.; Feller, D. J.; Fu, T.; Zhang, K.; Zhou, X.; Zhu, C.; Dai, D.; Yu, Y.; Zheng, G.; Li, Y. M.; McElhinney, D. B.; Culver, D. S.; Alfreds, S. T.; Stearns, F.; Sylvester, K. G.; Widen, E.; Ling, X. B. | 2016 | JMIR Med Inform                                                           | 10.2196/medinform.6328  | Non-cardiology focus |
| August 2021 | Effective Information Extraction Framework for Heterogeneous Clinical Reports Using Online Machine Learning and Controlled Vocabularies                                                                                         | Zheng, S.; Lu, J. J.; Ghasemzadeh, N.; Hayek, S. S.; Quyyumi, A. A.; Wang, F.                                                                                                                                                                                                              | 2017 | JMIR Med Inform                                                           | 10.2196/medinform.7235  | Non-cardiology focus |
| August 2021 | Personalized deep learning for ventricular arrhythmias detection on medical IoT systems                                                                                                                                         | Zhenge Jia; Zhepeng Wang; Feng Hong; Lichuan Ping; Yiyu Shi; Jingtong Hu                                                                                                                                                                                                                   | 2020 | Proceedings of the 39th International Conference on Computer-Aided Design | 10.1145/3400302.3415774 | No NLP focus/details |
| August 2021 | PAvessel: Practical 3D Vessel Structure Sensing through Photoacoustic Effects with Its Applications in Palm Biometrics                                                                                                          | Zhengxiong Li; Yuehang Wang; Aditya Singh Rathore; Chen Song; Nikhila Nyayapathi; Tri Vu; Jun Xia; Wenyao Xu                                                                                                                                                                               | 2018 | Proc. ACM Interact. Mob. Wearable Ubiquitous Technol.                     | 10.1145/3264932         | No NLP focus/details |

|             |                                                                                                                                                  |                                                                                                                                  |      |                                                                                       |                                                                                                     |                            |
|-------------|--------------------------------------------------------------------------------------------------------------------------------------------------|----------------------------------------------------------------------------------------------------------------------------------|------|---------------------------------------------------------------------------------------|-----------------------------------------------------------------------------------------------------|----------------------------|
| August 2021 | <i>IAfinder</i>: identifying potential implicit assumptions to facilitate validation in medical cyber-physical system                            | Zhicheng Fu; Zhao Wang; Chunhui Guo; Zhenyu Zhang; Shangping Ren; Lui Sha                                                        | 2018 | Proceedings of the 55th Annual Design Automation Conference                           | 10.1145/3195970.3196062                                                                             | Non-cardiology focus       |
| August 2021 | Medical Protocol Security: DICOM Vulnerability Mining Based on Fuzzing Technology                                                                | Zhiqiang Wang; Quanqi Li; Yazhe Wang; Biao Liu; Jianyi Zhang; Qixu Liu                                                           | 2019 | Proceedings of the 2019 ACM SIGSAC Conference on Computer and Communications Security | 10.1145/3319535.3363253                                                                             | Non-cardiology focus       |
| August 2021 | Advanced Data Analytics for Clinical Research Part II: Application to Cardiothoracic Surgery                                                     | Zhou, Nicolas; Corsini, Erin M.; Antonoff, Mara B.; Jin, Shida; Barbosa, Gregory R.; Kell, Trey; Antonoff, Michael H.            | 2020 | Innovations: Technology and Techniques in Cardiothoracic and Vascular Surgery         | <a href="http://dx.doi.org/10.1177/1556984520902824">http://dx.doi.org/10.1177/1556984520902824</a> | Review/perspective article |
| August 2021 | Nonadherence to Oral Antihyperglycemic Agents: Subsequent Hospitalization and Mortality among Patients with Type 2 Diabetes in Clinical Practice | Zhu, V. J.; Tu, W.; Rosenman, M. B.; Overhage, J. M.                                                                             | 2015 | Stud Health Technol Inform                                                            |                                                                                                     | Non-cardiology focus       |
| August 2021 | Incorporating patient deterioration when simulating utilization of a cardiovascular intensive care unit                                          | Ziqi Wang; Ambika Agrawal; Imani Carson; Luke Liu; Harini Pennathur; Hadi Saab; Amy Cohn; Amanda Moreno-Hernandez; Hitinder Gurm | 2020 | Proceedings of the Winter Simulation Conference                                       |                                                                                                     | Abstract only              |
| August 2021 | Study on Dairy Nutrition and Association with Chronic                                                                                            | Ziwei Liang                                                                                                                      | 2021 | 2020 4th International Conference on Computational Biology and Bioinformatics         | 10.1145/3449258.3449269                                                                             | Non-cardiology focus       |

|             |                                                                             |  |      |                                                                                                                                      |  |               |
|-------------|-----------------------------------------------------------------------------|--|------|--------------------------------------------------------------------------------------------------------------------------------------|--|---------------|
| August 2021 | 27th International Conference on Neural Information Processing, ICONIP 2020 |  | 2020 | Lecture Notes in Computer Science (including subseries Lecture Notes in Artificial Intelligence and Lecture Notes in Bioinformatics) |  | Abstract only |
| August 2021 | 27th International Conference on Neural Information Processing, ICONIP 2020 |  | 2020 | Lecture Notes in Computer Science (including subseries Lecture Notes in Artificial Intelligence and Lecture Notes in Bioinformatics) |  | Abstract only |
| August 2021 | 27th International Conference on Neural Information Processing, ICONIP 2020 |  | 2020 | Communication s in Computer and Information Science                                                                                  |  | Abstract only |
| August 2021 | 27th International Conference on Neural Information Processing, ICONIP 2020 |  | 2020 | Communication s in Computer and Information Science                                                                                  |  | Abstract only |

|             |                                                                             |  |      |                                                                                                                                      |  |               |
|-------------|-----------------------------------------------------------------------------|--|------|--------------------------------------------------------------------------------------------------------------------------------------|--|---------------|
| August 2021 | 27th International Conference on Neural Information Processing, ICONIP 2020 |  | 2020 | Lecture Notes in Computer Science (including subseries Lecture Notes in Artificial Intelligence and Lecture Notes in Bioinformatics) |  | Abstract only |
|-------------|-----------------------------------------------------------------------------|--|------|--------------------------------------------------------------------------------------------------------------------------------------|--|---------------|
